# Supplementary material for: A systematic map of machine learning in urban climate change mitigation
Source: Research Square preprint supplement (doi:10.21203/rs.3.rs-4242075/v1), 2024-05-08
Supplement: Supplementary file 1 [file 58c1897561cc169f0f5a4202.xlsx]

## Sheet: Sheet1
Cluster	Year	Title	Abstract	Keywords Author	Keywords Plus	Relevant - yes or no	Confirmed or consult	Impact area (primary)	Impact area (secondary)	Impact area (tertiary)	Journal	Publication Type	Document Type	WoS Citation Count	WoS Categories	Authors	Author Address	DOI	Cities	Countries
Urban Form	2020	Building CLIMATE ZONING in China USING supervised classification-based MACHINE LEARNING	The planning, design and construction of buildings are all influenced by CLIMATE. Building CLIMATE ZONING is significant for the formulation of building ENERGY EFFICIENCY strategies in various regions. However, there is overlapping among the variables USED for building CLIMATE ZONING (Temp(1) and Temp(7) in zones I and VI, and Temp(1) in zones II and VII) in the existing building CLIMATE ZONING s…	Building CLIMATE ZONING; Building ENERGY EFFICIENCY; Mahalanobis distance; Supervised classification algorithm	residential buildings; world map; design; zones; regionalization; construction; performance; comfort	Yes	Confirmed	Data provision/imputation			Building and environment	J	Article	0	Construction & Building Technology; Engineering, Environmental; Engineering, Civil	Yang, L; Lyu, KL; Li, HL; Liu, Y	[Yang, Liu; Lyu, Kailin; Li, Honglian; Liu, Yan] Xian Univ Architecture & Technol, State Key Lab Green Bldg Western China, Xian 710055, Shaanxi, Peoples R China; [Yang, Liu; Lyu, Kailin; Liu, Yan] Xian Univ Architecture & Technol, Sch Architecture, Xian 710055, Shaanxi, Peoples R China; [Li, Honglian] Xian Univ Architecture & Technol, Sch Informat & Control Engn, Xian 710055, Shaanxi, Peoples R C…	10.1016/j.buildenv.2020.106663		China
	2019	A short-term ENERGY prediction system based on edge computing for smart CITY	The development of Internet of Things technologies has provided potential for real-time monitoring and control of environment in smart CITIES. In the field of ENERGY management, ENERGY prediction can be carried out by sensing and analyzing dynamic environmental information of the ENERGY CONSUMPTION side, and provide decision support for ENERGY production to avoid excess or insufficient ENERGY sup…	Short-term ENERGY prediction; Internet of Things; Edge computing; Online DEEP LEARNING; Stream processing	neural-networks; data-management; CONSUMPTION; internet; ARCHITECTURE; things	Yes	Confirmed	Data provision/imputation	CO2 emission/energy consumption prediction		Future generation computer systems-the international journal of escience	J	Article	1	Computer Science, Theory & Methods	Luo, HD; Cai, HM; Yu, H; Sun, Y; Bi, ZM; Jiang, LH	[Luo, Haidong; Cai, Hongming; Yu, Han; Sun, Yan; Jiang, Lihong] Shanghai Jiao Tong Univ, Sch Software, 800 Dongchuan Rd, Shanghai, Peoples R China; [Bi, Zhuming] Purdue Univ, Dept Civil & Mech Engn, Ft Wayne, IN USA	10.1016/j.future.2019.06.030
	2019	PEV Charging Infrastructure SITING Based on Spatial-Temporal Traffic Flow Distribution	Plug-in electric vehicles (PEVs) offer a solution to REDUCE GREENHOUSE GAS emissions and decrease fossil FUEL CONSUMPTION. PEV charging infrastructure SITING mUST ensure not only a satisfactory charging service for PEV USERS but also a high utilization and profitability for the chosen facility locations. Thus, the various types of charging facilities should be located based on an accurate locatio…	Plug-in electric vehicle; charging infrastructure; SITING; traffic flow capturing; GAUSSIAN MIXTURE model; integer programming	electric vehicles; stations; location; models; formulation	Yes	Confirmed	Charging infrastructure			Ieee transactions on smart grid	J	Article	0	Engineering, Electrical & Electronic	Abdalrahman, A; Zhuang, WH	[Abdalrahman, Ahmed; Zhuang, Weihua] Univ Waterloo, Dept Elect & Comp Engn, Waterloo, ON N2L 3G1, Canada	10.1109/TSG.2019.2896697
	2019	GIS-based approach to identify CLIMATIC ZONING: A HIERARCHICAL CLUSTERING on PRINCIPAL COMPONENT ANALYSIS	In tropical environments, the design of bioCLIMATIC hoUSES adapted to their environment represents a crucial issue when considering thermal comfort and limiting ENERGY CONSUMPTION. A preliminary aspect of such design endeavors is the acquisition of accurate knowledge regarding the CLIMATIC conditions in each region of the studied territory. The objective of this paper is to propose a CLIMATIC ZON…	CLIMATIC ZONING; Madagascar; Multivariate analysis; ClUSTERING; GIS; Thermal comfort	thermal comfort; interpolation methods; world map; classification; temperature; performance; zones; strategies; buildings; tool	Yes	Confirmed	Data provision/imputation			Building and environment	J	Article	1	Construction & Building Technology; Engineering, Environmental; Engineering, Civil	Praene, JP; Malet-Damour, B; Radanielina, MH; Fontaine, L; Riviere, G	[Praene, Jean Philippe; Malet-Damour, Bruno; Fontaine, Ludovic] Univ Reunion, PIMENT Lab, 117 Rue Gen Ailleret, F-97430 Le Tampon, Reunion, France; [Radanielina, Mamy Harimisa] Univ Antananarivo, Inst Management Energy, POB 566, Antananarivo, Madagascar; [Riviere, Garry] Univ Reunion, Bldg Sci & Environm Dept, 117 Rue Gen Ailleret, F-97430 Le Tampon, Reunion, France	10.1016/j.buildenv.2019.106330	Fort-Liberté, Toliara, Antananarivo, Mahajanga, Nosy Be, Antsiranana, Sambava, Toamasina, Fianarantsoa	Madagascar
	2019	European Strategies for Adaptation to CLIMATE Change with the Mayors Adapt Initiative by SELF-ORGANIZING MAPs	The European Union (EU) has assigned MUNICIPAL governments a key role in the transformations needed to achieve its CLIMATE and ENERGY objectives. One of the main initiatives of the EU has been the "The Covenant of Mayors", launched in 2008, with impacts beyond Europe due to integration with the "Global Covenant of Mayors for CLIMATE and ENERGY". This research focUSES on local measures to adapt to…	European POLICIES; CLIMATE change; adaptation; profiles; pattern; ARTIFICIAL INTELLIGENCE; SELF-ORGANIZING MAPs; sUSTAINABILITY; URBAN PLANNING	ENERGY ACTION plans; decision-support; clUSTER-analysis; URBAN areas; covenant; MITIGATION; management; CITIES; framework; adoption	Yes	Confirmed	Multi-city study			Applied sciences-basel	J	Article	1	Chemistry, Multidisciplinary; Engineering, Multidisciplinary; Materials Science, Multidisciplinary; Physics, Applied	Abarca-Alvarez, FJ; Navarro-Ligero, ML; Valenzuela-Montes, LM; Campos-Sanchez, FS	[Javier Abarca-Alvarez, Francisco; Lorenzo Navarro-Ligero, Miguel; Miguel Valenzuela-Montes, Luis; Sergio Campos-Sanchez, Francisco] Univ Granada, Dept Urban & Spatial Planning, E-18071 Granada, Spain; [Javier Abarca-Alvarez, Francisco; Sergio Campos-Sanchez, Francisco] Univ Granada, Higher Tech Sch Architecture, E-18071 Granada, Spain; [Miguel Valenzuela-Montes, Luis] Univ Granada, Higher Tech S…	10.3390/app9183859		EU
	2019	A physical model-based method for retrieving URBAN land surface temperatures under cloudy conditions	Satellite-derived land surface temperature (LST), due to its synoptic coverage, has been widely USED for understanding surface ENERGY and carbon fluxes at local, regional, and global scales. Despite great achievements in developing practical algorithms to estimate LSTs from thermal infrared (TIR) data, the retrieval of LSTs for overcast conditions has received much less attention. Existing techni…	Land surface temperature; MODIS; Cloud contamination; URBAN canopy model; WRF; Thermal infrared	heat-island; soil-moisture; canopy model; modis lst; sensitivity; water; evapotranspiration; reconstruction; prediction; algorithm	Yes	Confirmed	Data provision/imputation			Remote sensing of environment	J	Article	1	Environmental Sciences; Remote Sensing; Imaging Science & Photographic Technology	Fu, P; Xie, YH; Weng, QH; Myint, S; Meacham-Hensold, K; Bernacchi, C	[Fu, Peng; Meacham-Hensold, Katherine; Bernacchi, Carl] Univ Illinois, Carl R Woese Inst Genom Biol, Dept Plant Biol, Urbana, IL 61820 USA; [Xie, Yanhua] Univ Wisconsin, Nelson Inst Ctr Sustainabil & Global Environm SAG, Madison, WI 53726 USA; [Weng, Qihao] Indiana State Univ, Dept Earth & Environm Syst, Ctr Urban & Environm Change, Terre Haute, IN 47809 USA; [Myint, Soe] Arizona State Univ, Sch …	10.1016/j.rse.2019.05.010
	2019	Forecasting ENERGY CONSUMPTION in Anhui province of China through two Box-Cox transformation quantile regression probability DENSITY methods	ENERGY CONSUMPTION can be taken as one of crucial indicators for economic development in any regions. Rapid development of economic, population and URBANIZATION in Anhui province of China has led ENERGY CONSUMPTION to grow rapidly. The considerable DEMAND for ENERGY has become an issue of great concern. For proper POLICY formulation, it is necessary to have reliable forecasts for ENERGY CONSUMPTI…	ENERGY CONSUMPTION; Probability DENSITY forecasting; Box-Cox transformation quantile regression; Stepwise regression method	neural-network; short-term; electriCITY CONSUMPTION; DEMAND; prediction; turkey; emissions; algorithm; impact; model	Yes	Confirmed	CO2 emission/energy consumption prediction			Measurement	J	Article	2	Engineering, Multidisciplinary; Instruments & Instrumentation	He, YY; Zheng, YY; Xu, QF	[He, Yaoyao; Zheng, Yaya; Xu, Qifa] Hefei Univ Technol, Sch Management, Hefei 230009, Anhui, Peoples R China; [He, Yaoyao; Zheng, Yaya; Xu, Qifa] Minist Educ, Key Lab Proc Optimizat & Intelligent Decis Making, Hefei 230009, Anhui, Peoples R China	10.1016/j.measurement.2019.01.008	Anhui	China
	2019	A hierarchical CLIMATIC ZONING method for ENERGY efficient building design applied in the region with diverse CLIMATE characteristics	The CLIMATE-responsive strategies for ENERGY efficient building design and management require a detailed understanding of the local CLIMATIC conditions, while CLIMATE zones are fundamental to building regulations and the application of technologies. Smaller and more homogeneous CLIMATE zones could help POLICY-makers and building designers to improve building ENERGY EFFICIENCY while improving the …	CLIMATIC ZONING; ENERGY efficient building design; Hierarchical AGGLOMERATIVE CLUSTERING (HAC); Passive design; Hot Summer and Cold Winter (HSCW) zone	residential buildings; hot summer; thermal comfort; performance; zones; impact; cold; classification; construction; CONSUMPTION	Yes	Confirmed	Data provision/imputation			Energy and buildings	J	Article	7	Construction & Building Technology; Energy & Fuels; Engineering, Civil	Xiong, J; Yao, RM; Grimmond, S; Zhang, QL; Li, BZ	[Xiong, Jie; Yao, Runming; Zhang, Qiulei; Li, Baizhan] Chongqing Univ, Minist Educ, Joint Int Res Lab Green Bldg & Built Environm, Chongqing 400045, Peoples R China; [Zhang, Qiulei; Li, Baizhan] Chongqing Univ, Minist Sci & Technol, Natl Ctr Int Res Low Carbon & Green Bldg, Chongqing 400045, Peoples R China; [Xiong, Jie; Yao, Runming] Univ Reading, Sch Built Environm, Reading RG6 6DF, Berks, Engl…	https://doi.org/10.1016/j.enbuild.2019.01.005		China
	2019	Analysis of Artificial NEURAL NETWORK ARCHITECTURES for Modeling Smart Lighting Systems for ENERGY SAVINGS	Currently, population growth is global and tends to concentrate in large CITIES, which increases the DEMAND for illuminating public spaces for safety, visual ORIENTATION, aesthetic considerations, and quality of life. The undesirable side effects are increase in ENERGY CONSUMPTION and light pollution. The current tools USED for designing public lighting systems are not suitable for optimizing mul…	Public lighting design; artificial NEURAL NETWORKS; multilayer PERCEPTRON; data modeling; ENERGY EFFICIENCY; uniformity ratio of luminance; sUSTAINABLE CITIES	improve	Yes	Confirmed	Street lighting			Ieee access	J	Article	0	Computer Science, Information Systems; Engineering, Electrical & Electronic; Telecommunications	Garces-Jimenez, A; Castillo-Sequera, JL; Del Corte-Valiente, A; Gomez-Pulido, JM; Gonzalez-Seco, EPD	[Garces-Jimenez, Alberto] Univ Francisco Vitoria, Ctr Res & Innovat Knowledge Management, Pozuelo De Alarcon 28223, Spain; [Luis Castillo-Sequera, Jose; Manuel Gomez-Pulido, Josi] Univ Alcala De Henares, Polytech Sch, Dept Comp Sci, Alcala De Henares 28871, Spain; [Del Corte-Valiente, Antonio] Univ Alcala De Henares, Polytech Sch, Dept Comp Engn, Alcala De Henares 28871, Spain; [Dominguez Gonzale…	10.1109/ACCESS.2019.2932055
	2019	Generative design and performance modeling for relationships between URBAN built forms, sky opening, solar radiation and ENERGY	For the past two decades, extensive research has been conducted to evaluate the performance of URBAN FORM scenarios such as SKY VIEW FACTORs, solar radiation, or ENERGY performance. Simulation-based performance analysis has been applied for optimizing URBAN DESIGN USING multiple performance criteria of ENERGY DEMANDS, daylighting, or radiance. Two major limitations exist in the performance evalua…	URBAN DESIGN; generative design; REINFORCEMENT LEARNING; parametric modeling; ENERGY performance		Yes	Confirmed	Urban/neighborhood design			Innovative solutions for energy transitions	S	Proceedings Paper	1	Energy & Fuels	Chang, S; Saha, N; Castro-Lacouture, D; Yang, PPJ	[Chang, Soowon; Castro-Lacouture, Daniel] Georgia Inst Technol, Sch Bldg Construct, Atlanta, GA 30332 USA; [Saha, Nirvik; Yang, Perry Pei-Ju] Georgia Inst Technol, Sch Architecture, Atlanta, GA 30332 USA; [Yang, Perry Pei-Ju] Georgia Inst Technol, Sch City & Reg Planning, Eco Urban Lab, Atlanta, GA 30332 USA	10.1016/j.egypro.2019.01.841	Shenzhen	China
	2019	Simulating URBAN growth boundaries USING a patch-based cellular automaton with economic and ecological constraints	URBAN growth boundaries (UGBs) have been applied in many rapid URBANizing areas to alleviate the problems of URBAN SPRAWL. Although empirical research has stressed the importance of ecological protection in UGB delineation, existing UGB models lack a component for the assessment of ecologically sensitive areas. To address this problem, we develop an innovative method that is capable of simulating…	URBAN growth boundary; SA-Patch-CA; AgentLA; ecological protection areas; scenario simulations	land-USE change; SUPPORT VECTOR MACHINES; agent-based model; logistic-regression; survival analysis; driving forces; optimization; expansion; area; construction	Yes	Confirmed	Spatial configurations/travel patterns			International journal of geographical information science	J	Article	9	Computer Science, Information Systems; Geography; Geography, Physical; Information Science & Library Science	Chen, YM; Li, X; Liu, XP; Huang, H; Ma, SF	[Chen, Yimin; Liu, Xiaoping] Sun Yat Sen Univ, Sch Geog & Planning, Guangzhou, Guangdong, Peoples R China; [Chen, Yimin; Liu, Xiaoping] Sun Yat Sen Univ, Guangdong Key Lab Urbanizat & Geosimulat, Guangzhou, Guangdong, Peoples R China; [Li, Xia] East China Normal Univ, Sch Geog Sci, Shanghai, Peoples R China; [Li, Xia] East China Normal Univ, Key Lab Geog Informat Sci, Minist Educ, Shanghai, Peopl…	10.1080/13658816.2018.1514119		China
	2018	Land-USE Carbon Emissions Estimation for the Yangtze River Delta URBAN Agglomeration USING 1994-2016 Landsat Image Data	The amount and growth rate of carbon emissions have been accelerated on a global scale since the indUSTRIAL revolution (1800), especially in recent decades. This has resulted in a significant influence on the natural environment and human societies. Therefore, carbon emission REDUCTION receives continuoUSLY increasing public attention and has long been under debate. In this study, we made USE of …	carbon dioxide; URBAN agglomeration; Yangtze River Delta; Landsat; land-USE; spatial autocorrelation	local morans i; ENERGY-CONSUMPTION; RANDOM FORESTS; china; cover; intensity; growth; sinks; co2; quantification	Yes	Confirmed	CO2 emission/energy consumption prediction			Remote sensing	J	Article	8	Remote Sensing	Cui, YF; Li, L; Chen, LQ; Zhang, Y; Cheng, L; Zhou, XS; Yang, XY	[Cui, Yifan; Li, Long; Chen, Longqian; Zhang, Yu; Cheng, Liang; Zhou, Xisheng; Yang, Xiaoyan] China Univ Min & Technol, Sch Environm Sci & Spatial Informat, Daxue Rd 1, Xuzhou 221116, Jiangsu, Peoples R China; [Li, Long] Vrije Univ Brussel, Dept Geog Earth Syst Sci, Pl Laan 2, B-1050 Brussels, Belgium; [Zhang, Yu; Yang, Xiaoyan] Jiangsu Normal Univ, Sch Geog Geomat & Planning, Shanghai Rd 101, Xu…	10.3390/rs10091334		China
	2018	USING Particle Swarm Optimization method to optimize the carbon sequestration potential of agricultural afforestation in Beijing, China	Agricultural afforestation is an important way to MITIGATE CLIMATE change and improve the environmental quality of CITY system. The major restriction of planning agricultural afforestation programs and optimize the carbon sequestration potential of these programs is the decrease of food productivity. The spatial heterogeneity of both the food productivity and carbon sequestration potential furthe…	Particle Swarm Optimization; Agricultural Afforestation; Carbon sequestration; URBAN PLANNING; Beijing	soil organic-carbon; land; model; mechanisms; allocation; cropland; POLICY; area	Yes	Confirmed				2018 ieee smartworld, ubiquitous intelligence & computing, advanced & trusted computing, scalable computing & communications, cloud & big data computing, internet of people and smart city innovation (smartworld/scalcom/uic/atc/cbdcom/iop/sci)	B	Proceedings Paper	0	Computer Science, Theory & Methods; Engineering, Electrical & Electronic	Yao, JT; Kong, XB; Lal, R	[Yao, Jingtao; Kong, Xiangbin] China Agr Univ, Coll Land Sci & Technol, Beijing, Peoples R China; [Lal, Rattan] Ohio State Univ, Carbon Management & Sequestrat Ctr, Columbus, OH 43210 USA	10.1109/SmartWorld.2018.00348	Beijing	China
	2018	An Improved DBSCAN Method for Self-sufficient Microgrid Design	Self-sufficiency is a key feature of a microgrid with distributed ENERGY resources (DERs) and ENERGY storage. Due to sizing interdependency between DERs and ENERGY storage, the size relationship across them is investigated based on given models. For SITING of DERs and storage, the new proposed method, DBSCAN based on load-impedance DENSITY, is applied to identify high load-impedance areas. For se…	Load-impedance DENSITY; DBSCAN; clUSTERING; microgrid; power loss		Yes	Confirmed	Utility infrastructure planning			2018 north american power symposium (naps)	S	Proceedings Paper	0	Energy & Fuels; Engineering, Electrical & Electronic	Ren, HD; Schulz, NN	[Ren, Hongda; Schulz, Noel N.] Washington State Univ, Sch Elect Engn & Comp Sci, Pullman, WA 99164 USA	10.1109/NAPS.2018.8600608
	2018	Mining transition rules of cellular automata for simulating URBAN expansion by USING the DEEP LEARNING techniques	Along with the gradually accelerated URBANIZATION process, simulating and predicting the future pattern of the CITY is of great importance to the prediction and prevention of some environmental, economic and URBAN issues. Previous studies have generally integrated traditional MACHINE LEARNING with cellular automaton (CA) models to simulate URBAN development. Nevertheless, difficulties still exist…	URBAN expansion; cellular automata; large scale; DEEP LEARNING; Markov chain	pearl river delta; land-USE changes; markov-chain; integrated approach; ENERGY-CONSUMPTION; zhujiang delta; san-francisco; model; growth; gis	Yes	Confirmed	Spatial configurations/travel patterns			International journal of geographical information science	J	Article	9	Computer Science, Information Systems; Geography; Geography, Physical; Information Science & Library Science	He, JL; Xia, L; Yao, Y; Ye, H; Zhang, JB	[Xia Li] East China Normal Univ, Minist Educ, Key Lab Geog Informat Sci, Sch Geog Sci, Shanghai, Peoples R China; [He, Jialv; Xia Li; Zhang Jinbao] Sun Yat Sen Univ, Guangdong Key Lab Urbanizat & Geosimulat, Sch Geog & Planning, Guangzhou, Guangdong, Peoples R China; [Yao Yao] China Univ Geosci, Sch Informat Engn, Wuhan, Hubei, Peoples R China; [Yao Yao] Alibaba Grp, Dept Data Technol & Prod, Han…	10.1080/13658816.2018.1480783		China
	2018	CARBON DYNAMIC SHIFTS WITH LAND USE CHANGE IN MARGALLAH HILLS NATIONAL PARK, ISLAMABAD (PAKISTAN) FROM 1990 TO 2017	LAND USE change (LUC) particularly the conversion of forest to other LAND USES, determines the scale of forest carbon shifts. Here, remotely sensed data Multispectral Satellite Images (MSI) of the study area for the year 1990, 2000, 2010, 2017 and geographic information system (GIS) tools were USED to analyze the LAND USE change patterns. For biomass calculation and related forest carbon losses i…	remote sensing; forest loss; satellite images; LAND USE change; carbon loss	conterminous united-states; remote-sensing data; cover change; tropical regions; protected areas; forest biomass; CLIMATE-change; deforestation; management; delta	Yes	Confirmed	Spatial configurations/travel patterns			Applied ecology and environmental research	J	Article	6	Ecology; Environmental Sciences	Mannan, A; Feng, Z; Ahmad, A; Liu, J; Saeed, S; Mukete, B	[Mannan, A.; Feng, Z.; Liu, J.] Beijing Forestry Univ, Beijing Key Lab Precis Forestry, Beijing 100083, Peoples R China; [Feng, Z.; Liu, J.; Saeed, S.; Mukete, B.] Beijing Forestry Univ, Minist Educ, Key Lab Silviculture & Conservat, Beijing 100083, Peoples R China; [Ahmad, A.] Beijing Forestry Univ, Dept Forest Sci, Beijing 100083, Peoples R China; [Ahmad, A.] Shaheed Benazir Bhutto Univ, Sherin…	10.15666/aeer/1603_31973214	Islamabad	Pakistan
	2017	Barriers against and ACTIONS TOWARDS renewable ENERGY technologies diffUSION: A PRINCIPAL COMPONENT ANALYSIS for residential ground source heat pump (GSHP) systems	The residential sector is responsible for 20% of the total ENERGY CONSUMPTION worldwide, with fossil FUELs being its main ENERGY source. Ground Source Heat Pump (GSHP) systems are an alternative option for heating, cooling and Domestic Hot Water (DHW) production in the residential sector, offering several advantages compared to conventional systems. Through a survey, this paper examines the views…	Renewable ENERGY sources; Ground source heat pumps; Residential sector; DiffUSION barriers; DiffUSION ACTIONS; PRINCIPAL COMPONENT ANALYSIS	exploratory factor-analysis; geothermal-ENERGY; grouting materials; experimental performance; sUSTAINABLE development; cold CLIMATE; exchangers; EFFICIENCY; buildings; design	Yes	Confirmed	Fuel switch			Renewable & sustainable energy reviews	J	Review	13	Green & Sustainable Science & Technology; Energy & Fuels	Karytsas, S; Choropanitis, I	[Karytsas, Spyridon; Choropanitis, Ioannis] Ctr Renewable Energy Sources & Saving CRES, Geothermal Energy Dept, 19th Km Marathonos Ave, Athens 19009, Greece	10.1016/j.rser.2017.04.060
	2017	FAMILIAR AND UNFAMILIAR DATA SETS IN SUSTAINABLE URBAN PLANNING	Achieving ENERGY efficient URBAN PLANNING requires a multi-disciplinary planning approach. The huge increase in data from sensors and simulations does not help to REDUCE the burden of planners. On the contrary, unfamiliar multi-disciplinary data sets can bring planners into a hopeless tangle. This paper applies SEMI-SUPERVISED LEARNING methods to address such planning data issues. A case study is…	ENERGY performance; S3VM; decision TREE; familiar and unfamiliar	data-mining approach; frechet distance; ENERGY USE	Yes	Confirmed	Urban/neighborhood design	Multi-stakeholder planning process		Proceedings of the 22nd international conference on computer-aided architectural design research in asia (caadria 2017): protocols, flows and glitches	B	Proceedings Paper	0	Architecture; Computer Science, Interdisciplinary Applications	Liu, YZ; Stouffs, R	[Liu, Yuezhong; Stouffs, Rudi] Natl Univ Singapore, Singapore, Singapore
	2016	Management and estimation of thermal comfort, carbon dioxide emission and economic growth by SUPPORT VECTOR MACHINE	URBANIZATION and CLIMATE change are two defining environmental phenomena and these two processes are increasingly interconnected, as rapid URBANIZATION is often accompanied by a change in lifestyle, increasing CONSUMPTIONs and ENERGY USES, which contribute heavily TOWARDS CLIMATE change and thermal comfort. Success of public URBAN areas in attrACTION of residents depends on thermal comfort of the…	Thermal comfort; Economic growth; Carbon dioxide emission; SUPPORT VECTOR MACHINE	heat-pump system; neural-networks; URBAN FORMS; parameters; model; hot; algorithm; CLIMATE; gender; spaces	Yes	Confirmed	CO2 emission/energy consumption prediction			Renewable & sustainable energy reviews	J	Review	12	Green & Sustainable Science & Technology; Energy & Fuels	Mladenovic, I; Sokolov-Mladenovic, S; Milovancevic, M; Markovic, D; Simeunovic, N	[Mladenovic, Igor; Sokolov-Mladenovic, Svetlana] Univ Nis, Fac Econ, Trg Kralja Aleksandra 11, Nish 18000, Serbia; [Milovancevic, Milos; Markovic, Dusan] Univ Nis, Fac Mech Engn, Aleksandra Medvedeva 14, Nish 18000, Serbia; [Simeunovic, Nenad] Fac Tech Sci, Trg Dositeja Obradovica 6, Novi Sad 21000, Serbia	10.1016/j.rser.2016.06.034
	2016	A simulation model for visitors' thermal comfort at URBAN public squares USING non-probabilistic binary-linear classifier through soft-computing methodologies	SUSTAINING outdoor life in CITIES is decreasing becaUSE of the recent rapid URBANISATION without considering CLIMATE-responsive URBAN DESIGN concepts. Such inadvertent CLIMATIC modifications at the indoor level have imposed considerable DEMAND on the URBAN ENERGY resources. It is important to provide comfortable ambient CLIMATE at open URBAN squares. Researchers need to predict the comfortable co…	Thermal comfort conditions; Outdoor spaces; SUPPORT VECTOR MACHINE; Wavelet algorithm; MicroCLIMATE	SUPPORT VECTOR MACHINES; antarctic tourism; wavelet transform; outdoor; environments; parameters; gender; hot; predictions; perspective	Yes	Confirmed	Urban/neighborhood design			Energy	J	Article	5	Thermodynamics; Energy & Fuels	Kariminia, S; Shamshirband, S; Hashim, R; Saberi, A; Petkovic, D; Roy, C; Motamedi, S	[Kariminia, Shahab] Islamic Azad Univ, Najafabad Branch, Fac Art Architecture & Urban Planning, Dept Architecture, Najafabad, Isfahan, Iran; [Shamshirband, Shahaboddin] Univ Malaya, Fac Comp Sci & Informat Technol, Dept Comp Syst & Technol, Kuala Lumpur 50603, Malaysia; [Hashim, Roslan; Roy, Chandrabhushan; Motamedi, Shervin] Univ Malaya, Fac Engn, Dept Civil Engn, Kuala Lumpur 50603, Malaysia; […	10.1016/j.energy.2016.02.021	Isfahan	Iran
	2015	URBAN VEGETATION cover extrACTION from hyperspectral imagery and geographic information system spatial analysis techniques: case of Athens, Greece	The present study aimed at evaluating the performance of two different pixel-based classifiers [spectral angle mapper (SAM) and SUPPORT VECTOR MACHINES (SVMs)] in discriminating different land-cover classes in a typical URBAN SETTING, focUSING particularly on URBAN VEGETATION cover by utilizing hyperspectral (EO-1 Hyperion) data. As a case study, the CITY of Athens, Greece, was USED. Validation o…	Earth observation; geographical information systems; Hyperion; SUPPORT VECTOR MACHINES; spectral angle mapper; Athens; Greece	SUPPORT VECTOR MACHINES; object-based classification; burnt area delineation; spectral angle mapper; ecosystem services; neural-network; SHADE TREES; ENERGY USE; land; identification	Yes	Confirmed	Zoning/land use/green space	Data provision/imputation		Journal of applied remote sensing	J	Article	10	Environmental Sciences; Remote Sensing; Imaging Science & Photographic Technology	Petropoulos, GP; Kalivas, DP; Georgopoulou, IA; Srivastava, PK	[Petropoulos, George P.] Aberystwyth Univ, Dept Geog & Earth Sci, Aberystwyth SY23 3DB, Dyfed, Wales; [Petropoulos, George P.; Kalivas, Dionissios P.; Georgopoulou, Iro A.] Agr Univ Athens, Dept Nat Resources Management & Agr Engn, Athens 11855, Greece; [Srivastava, Prashant K.] NASA, Goddard Space Flight Ctr, Hydrol Sci Branch, Greenbelt, MD 20771 USA; [Srivastava, Prashant K.] Univ Maryland, Ea…	10.1117/1.JRS.9.096088	Athens	Greece
	2015	Predictive Control of Thermal Storage Systems Designed for Multi-ENERGY DISTRICT Boilers: A Case Study in France	The present work deals with improving the operation of a multi-ENERGY DISTRICT boiler by adding to the plant an optimally-designed thermal storage tank and developing a model-based predictive controller in order to manage it. The proposed ARCHITECTURE generates optimal command sequences dealing with the amount of thermal ENERGY to be stored or released. In order to implement such a controller, on…	multi-ENERGY DISTRICT boiler; thermal ENERGY storage; model predictive control; artificial NEURAL NETWORKS; power DEMAND	feedforward networks; wavelet transforms; algorithm; model; strategy	Yes	Confirmed	District heating and cooling	CO2 emission/energy consumption prediction		Proceedings of the ises solar world conference 2015	B	Proceedings Paper	0	Construction & Building Technology; Green & Sustainable Science & Technology; Energy & Fuels	Labidi, M; Eynard, J; Faugeroux, O; Grieu, S	[Labidi, Mouchira] Cofely GDF Suez, Cylergie, 18 Ave Tony Gamier, F-69007 Lyon, France; [Eynard, Julien; Faugeroux, Olivier; Grieu, Stephane] Univ Perpignan, F-66860 Perpignan, France; [Eynard, Julien; Faugeroux, Olivier; Grieu, Stephane] Tecnosud, PROMES CNRS, Rambla Thermodynam, F-66100 Perpignan, France	10.18086/swc.2015.02.09	Alsace	France
	2014	A systematic sensitivity analysis of constrained cellular automata model for URBAN growth simulation based on different transition rules	Cellular automata (CA) have emerged as a primary tool for URBAN growth modeling due to its simpliCITY, transparency, and ease of implementation. Sensitivity analysis is an important component in CA modeling for a better understanding of errors or uncertainties and their propagation. Most studies on sensitivity analyses in URBAN CA modeling focus on specific component such as NEIGHBORHOOD configur…	uncertainty analysis; stochastic perturbation; ensemble; logistic regression; CART	ENERGY-CONSUMPTION; scale sensitivity; china; expansion; URBANIZATION; patterns; behavior; form	Yes	Confirmed	Spatial configurations/travel patterns			International journal of geographical information science	J	Article	37	Computer Science, Information Systems; Geography; Geography, Physical; Information Science & Library Science	Li, XC; Liu, XP; Yu, L	[Li, Xuecao; Yu, Le] Tsinghua Univ, Ctr Earth Syst Sci, Ministry Educ, Key Lab Earth Syst Modeling, Beijing 100084, Peoples R China; [Li, Xuecao; Liu, Xiaoping] Sun Yat Sen Univ, Sch Geog & Planning, Guangzhou 510275, Guangdong, Peoples R China; [Li, Xuecao; Liu, Xiaoping] Sun Yat Sen Univ, Guangdong Key Lab Urbanizat & Geosimulat, Guangzhou 510275, Guangdong, Peoples R China	10.1080/13658816.2014.883079	Guangzhou	China
	2013	Comprehensive EFFICIENCY evaluation model for electrical distribution system considering social and URBAN factors	This paper addresses a comprehensive EFFICIENCY evaluation model for electrical distribution system. Concerning the EFFICIENCY of different resources including ENERGY, infrastructure and human resources, the overall distribution system EFFICIENCY is determined on the basis of relevant EFFICIENCY indicators. The employed EFFICIENCY indicators comprising loss, utilization factor, power factor, load…	EFFICIENCY indicators; Electrical distribution system; External factors; Sensitivity analysis	ENERGY EFFICIENCY; DEMAND response; loss REDUCTION; optimization; sector; impact; heat	Yes	Confirmed	Utility infrastructure planning			Energy	J	Article	11	Thermodynamics; Energy & Fuels	Dashti, R; Yousefi, S; Moghaddam, MP	[Dashti, Reza] Iran Univ Sci & Technol IUST, Sch Elect Engn, Dept Elect Engn, Tehran 16844, Iran; [Yousefi, Shaghayegh] Iranian Res Org Sci & Technol, Tehran, Iran; [Moghaddam, Mohsen Parsa] Tarbiat Modares Univ, Dept Elect & Comp Engn, Tehran, Iran	10.1016/j.energy.2013.07.042	Boushehr	Iran
	2010	AGA (Asset GOVERNANCE Assessment) for analyzing affect of subsidy on MC (Marginal Cost) in electriCITY distribution sector	Nowadays subsidy payments on electrical ENERGY have to be managed and controlled to prevent any side effect particularly in developing countries. Effects of some external factors on ENERGY CONSUMPTION and electriCITY distribution indices are analyzed in this paper. External factors are classified into three categories of social behavior, GOVERNANCE and URBAN PLANNING. MC (Marginal Cost) of electr…	ElectriCITY distribution; Asset GOVERNANCE; Marginal cost; Subsidy	POLICY	Yes	Confirmed	Multi-stakeholder planning process			Energy	J	Article	3	Thermodynamics; Energy & Fuels	Dashti, R; Afsharnia, S; Ghaderi, F	[Dashti, Reza; Afsharnia, Saeed] Univ Tehran, Sch Elect & Comp Engn, Tehran, Iran; [Ghaderi, Farid] Univ Tehran, Dept Ind Engn, Tehran, Iran	10.1016/j.energy.2010.08.022	Bushehr	Iran
	2010	Mapping global URBAN areas USING MODIS 500-m data: New methods and datasets based on 'URBAN ecoregions'	Although CITIES, TOWNS and SETTLEMENTS cover only a tiny frACTION (<1%) of the world's surface, URBAN areas are the nexus of human activity with more than 50% of the population and 70-90% of economic activity. As such, material and ENERGY CONSUMPTION, air pollution, and expanding IMPERVIOUS SURFACE are all concentrated in URBAN areas, with important environmental implications at local, regional a…	URBAN areas; URBANIZATION; CITIES; Global monitoring; LAND COVER; Environment; Classification; Decision TREES; MACHINE LEARNING	land-cover; logistic-regression; classification; ecosystem; growth; model; map; validation; phenology; DENSITY	Yes	Confirmed	Data provision/imputation			Remote sensing of environment	J	Article	318	Environmental Sciences; Remote Sensing; Imaging Science & Photographic Technology	Schneider, A; Friedl, MA; Potere, D	[Schneider, Annemarie] Univ Wisconsin, Nelson Inst Environm Studies, Ctr Sustainabil & Global Environm, Madison, WI 53726 USA; [Friedl, Mark A.] Boston Univ, Dept Geog & Environm, Boston, MA 02215 USA; [Potere, David] Princeton Univ, Off Populat Res, Princeton, NJ 08544 USA	10.1016/j.rse.2010.03.003
	2021	A real-time predictive software prototype for simulating urban-scale energy consumption based on surrogate models	This paper discusses the development of an experimental software prototype that uses surrogate models for predicting the monthly energy consumption of urban-scale community design scenarios in real time. The surrogate models were prepared by training artificial neural networks on datasets of urban form and monthly energy consumption values of all zip codes in San Diego county. The surrogate model…	Artificial neural networks; simulation; surrogate modeling; urban-scale energy modeling	FORM; FRAMEWORK; CLIMATE; IMPACT	Yes	Confirmed	CO2 emission/energy consumption prediction	Urban/neighborhood design		AI EDAM-ARTIFICIAL INTELLIGENCE FOR ENGINEERING DESIGN ANALYSIS AND MANUFACTURING	J	Article	0	Computer Science, Artificial Intelligence; Computer Science, Interdisciplinary Applications; Engineering, Multidisciplinary; Engineering, Manufacturing	Rahimian, M; Duarte, JP; Iulo, LD	[Rahimian, Mina] Penn State Univ, Stuckeman Sch Architecture & Landscape Architectu, University Pk, PA 16802 USA; [Duarte, Jose Pinto] Penn State Univ, Stuckeman Ctr Design Comp, Stuckeman Sch Architecture & Landscape Architectu, University Pk, PA 16802 USA; [Iulo, Lisa Domenica] Penn State Univ, Hamer Ctr Community Design, Stuckeman Sch Architecture & Landscape Architectu, University Pk, PA 1680…	10.1017/S0890060421000184	San Diego	USA
	2021	A collaborative predictive multi-agent system for forecasting carbon emissions related to energy consumption	Energy production and consumption are one of the largest sources of greenhouse gases (GHG), along with industry, and is one of the highest causes of global warming. Forecasting the environmental cost of energy production is necessary for better decision making and easing the switch to cleaner energy systems in order to reduce air pollution. This paper describes a hybrid approach based on Artifici…	Neural networks; agent-based architecture; short-term forecasting; carbon dioxide; renewable energy	ARTIFICIAL NEURAL-NETWORK; CO2 EMISSIONS; MODEL; GENERATION; ENSEMBLE; DEMAND; AGENTS	Yes	Confirmed	CO2 emission/energy consumption prediction			MULTIAGENT AND GRID SYSTEMS	J	Article	1	Computer Science, Theory & Methods	Bouziane, SE; Khadir, MT; Dugdale, J	[Bouziane, Seif Eddine; Khadir, Mohamed Tarek] Univ Badji Mokhtar, Dept Comp Sci, Lab Gest Elect Documents, Annaba, Algeria; [Dugdale, Julie] Univ Grenoble Alps, Lab Informat Grenoble UMR 5217, Grenoble, France	10.3233/MGS-210342	Annaba	Algeria
	2020	Energy Consumption Prediction in Vietnam with an Artificial Neural Network-Based Urban Growth Model	In developing countries, energy planning is important in the development planning due to high rates of economic growth and energy demand. However, existing approaches of energy prediction, using gross domestic product, hardly demonstrate how much energy specific regions or cities may need in the future. Thus, this study seeks to predict the amount of energy demand by considering urban growth as a…	artificial neural network; energy consumption; energy demand; urban growth; night-time satellite light data	LAND-COVER; CITY; GIS	Yes	Confirmed	CO2 emission/energy consumption prediction	Utility infrastructure planning		ENERGIES	J	Article	2	Energy & Fuels	Lee, HY; Jang, KM; Kim, Y	[Lee, Hye-Yeong; Jang, Kee Moon; Kim, Youngchul] Korea Adv Inst Sci & Technol, Dept Civil & Environm Engn, KAIST Urban Design Lab, Daejeon 34141, South Korea	10.3390/en13174282	Ho Chi Minh City, Hanoi	Vietnam
	2020	A novel method of building climate subdivision oriented by reducing building energy demand	Climatic zoning is an important tool in building energy policy and regulations, smaller and more homogeneous climate zones could help enhance the rationality of energy policymaking. In most countries, climate zoning is based on simplified climate models, and it is difficult to accurately represent the energy demand characteristics of buildings. Therefore, this paper proposes a novel climate subdi…	Climatic zoning; Building energy demand; Cluster analysis; Uncertainty analysis; Discriminant analysis	RESIDENTIAL BUILDINGS; DESIGN; UNCERTAINTY; PERFORMANCE; CONSUMPTION; EFFICIENCY; OPTIMIZATION; SIMULATION; PREDICTION; EUROPE	Yes	Confirmed	Urban/neighborhood design	CO2 emission/energy consumption prediction		ENERGY AND BUILDINGS	J	Article	3	Construction & Building Technology; Energy & Fuels; Engineering, Civil	Wang, R; Lu, SL	[Wang, Ran; Lu, Shilei] Tianjin Univ, Sch Environm Sci & Engn, 92 Weijin Rd, Tianjin 300072, Peoples R China	10.1016/j.enbuild.2020.109999		China
	2021	Prediction of energy consumption and evaluation of affecting factors in a full-scale WWTP using a machine learning approach	Treatment of municipal wastewater to meet the stringent effluent quality standards is an energyintensive process and the main contributor to the costs of wastewater treatment plants (WWTPs). Analysis and prediction of energy consumption (EC) are essential in designing and operating sustainable energy-saving WWTPs. In this study, the effect of wastewater, hydraulic, and climate-based parameters on…	Machine learning; Energy consumption; Power-grid prediction; WWTP; Feature selection; Wastewater characteristics	MODELS; REGRESSION	Yes	Confirmed	CO2 emission/energy consumption prediction	Utility infrastructure planning		PROCESS SAFETY AND ENVIRONMENTAL PROTECTION	J	Article	1	Engineering, Environmental; Engineering, Chemical	Bagherzadeh, F; Nouri, AS; Mehrani, MJ; Thennadil, S	[Bagherzadeh, Faramarz] Gdansk Univ Technol, Fac Mech & Ship Engn, Narutowicza St 11-12, PL-80233 Gdansk, Poland; [Nouri, Amirreza Shojaei] Univ Stuttgart, Fac Civil & Environm Engn, D-70049 Stuttgart, Germany; [Mehrani, Mohamad-Javad] Gdansk Univ Technol, Fac Civil & Environm Engn, Narutowicza St 11-12, PL-80233 Gdansk, Poland; [Mehrani, Mohamad-Javad] Univ Duisburg Essen, Dept Urban Water & Was…	10.1016/j.psep.2021.08.040	Melbourne	Australia
	2020	Evaluation of spatially heterogeneous driving forces of the urban heat environment based on a regression tree model	The urban heat environment, represented by land surface temperature (LST), is highly heterogeneous. Previous studies have investigated the universal physical laws during LST modeling. However, spatial patterns of the driving forces and their temporal differences have not been well examined. In this study, spatially heterogeneous effects of two important urban biophysical compositions, Normalized …	Land surface temperature (LST); Urban biophysical composition; Spatially heterogeneous driving forces; Regression tree model	LAND-SURFACE TEMPERATURE; WINDOW ALGORITHM; ISLAND; IMPACT; PATTERN; COVER; CLASSIFICATION; URBANIZATION; VARIABILITY; INDICATORS	Yes	Confirmed	Urban/neighborhood design			SUSTAINABLE CITIES AND SOCIETY	J	Article	0	Construction & Building Technology; Green & Sustainable Science & Technology; Energy & Fuels	Guo, GH; Wu, ZF; Chen, YB	[Guo, Guanhua; Wu, Zhifeng; Chen, Yingbiao] Guangzhou Univ, Sch Geog Sci, Guangzhou 510006, Guangdong, Peoples R China; [Guo, Guanhua; Wu, Zhifeng; Chen, Yingbiao] Guangzhou Univ, Guangdong Prov Engn Technol Res Ctr Geog Condit M, Guangzhou 510006, Guangdong, Peoples R China	10.1016/j.scs.2019.101960
	2021	Green standard model using machine learning: identifying threats and opportunities facing the implementation of green building in Iran	Residential buildings consume a major portion of energy resources and hence are seriously involved in environmental pollution. In Iran, fossil fuel consumption is growing, such that it increased by more than 400% from 1990 to 2018. One of the fundamental solutions for reducing fossil fuel consumption and creating a healthy environment inside and outside buildings is implementing and developing gr…	Green standard; Machine learning; Energy consumption; Environmental pollution; Iran	ENERGY-CONSUMPTION; SOLAR COLLECTOR; CO2 EMISSIONS; BARRIERS; PERSPECTIVE; MANAGEMENT; BENEFITS; SYSTEM	Yes	Confirmed	Urban/neighborhood design			ENVIRONMENTAL SCIENCE AND POLLUTION RESEARCH	J	Article	0	Environmental Sciences	Rajabi, M; Sardroud, JM; Kheyroddin, A	[Rajabi, Mohamad; Sardroud, Javad Majrouhi] Islamic Azad Univ, Cent Tehran Branch, Dept Civil & Construct Engn, Tehran, Iran; [Kheyroddin, Ali] Semnan Univ, Dept Civil Engn, Semnan, Iran	10.1007/s11356-021-14991-3	Isfahan, Yazd, Kerman	Iran
	2021	A hybrid RNN model for mid-to-long term electricity demand forecasting incorporating weather influences	In the daily operation of the city, the power supply should be non-interruptible, which brings challenges to the modern power management. Energy demand forecasting can optimize the strategy of power management and improve energy efficiency. The traditional Long Short-Term Memory model, based on the encodingdecoding structure, encodes all the historical information as a fixed-length vector, which …	time series data; deep learning; energy optimization; word embedding	ENERGY-CONSUMPTION; LOAD; TEMPERATURE	Yes	Confirmed	CO2 emission/energy consumption prediction	Modeling method contribution		AT-AUTOMATISIERUNGSTECHNIK	J	Article	0	Automation & Control Systems	Peng, JY; Wang, DK; Kimmig, A; Langovoy, MA; Wang, JH; Ovtcharova, J	[Peng Jieyang; Wang Jiahai] Tongji Univ, Chinesich Deutsch Zentrum Maschinenbau, Shanghai 200092, Peoples R China; [Wang Dongkun] Univ Stuttgart, Keplerstr 7, D-70174 Stuttgart, Germany; [Kimmig, Andreas; Langovoy, Mikhail A.; Ovtcharova, Jivka] Karlsruhe Inst Technol, Inst Informationsmanagement Ingn IMI, D-76133 Karlsruhe, Germany	10.1515/auto-2020-0033	Shanghai	China
	2021	Spatial-Temporal Changes and Associated Determinants of Global Heating Degree Days	The heating degree days (HDDs) could indicate the climate impact on energy consumption and thermal environment conditions effectively during the winter season. Nevertheless, studies on the spatial-temporal changes in global HDDs and their determinants are scarce. This study used multi-source data and several methods to explore the rules of the spatial distribution of global HDDs and their interan…	climate change; energy consumption; thermal environment; Hurst exponents; influence factors; enhanced vegetation index; PMlbedo; remote sensing; general regression neural network	LAND-USE CHANGE; SPATIOTEMPORAL CHANGES; CLIMATE-CHANGE; ENERGY DEMAND; URBAN; IMPACT; TEMPERATURE; URBANIZATION; VULNERABILITY; VARIABILITY	Yes	Confirmed	CO2 emission/energy consumption prediction			INTERNATIONAL JOURNAL OF ENVIRONMENTAL RESEARCH AND PUBLIC HEALTH	J	Article	1	Environmental Sciences; Public, Environmental & Occupational Health	Li, YZ; Li, JY; Xu, A; Feng, ZZ; Hu, CJ; Zhao, GS	[Li, Yuanzheng; Li, Jinyuan; Xu, Ao; Feng, Zhizhi] Henan Univ Econ & Law, Sch Resources & Environm, Zhengzhou 450046, Peoples R China; [Li, Yuanzheng] Acad Lab Urban & Rural Spatial Data Min Henan Pro, Zhengzhou 450046, Peoples R China; [Hu, Chanjuan] Henan Acad Sci, Inst Geog Sci, Zhengzhou 450052, Peoples R China; [Zhao, Guosong] China Univ Geosci, Sch Geog & Informat Engn, Wuhan 430074, People…	10.3390/ijerph18126186
	2021	Estimating District-Level Electricity Consumption Using Remotely Sensed Data in Eastern Economic Corridor, Thailand	The intensive industrial development in special economic zones, such as Thailand's Eastern Economic Corridor, increases energy consumption, leading to an imbalance of energy supply and a challenge for energy management. Electricity consumption at a local level is crucial for utility planners to manage and invest in the electrical grid. With this study, we propose an electricity consumption estima…	electricity consumption; locally prediction model; remote sensing; decision tree; regression method; machine learning; nighttime imagery	ENERGY-CONSUMPTION; REGRESSION-ANALYSIS; SATELLITE IMAGERY; SELECTION; TREE	Yes	Confirmed	CO2 emission/energy consumption prediction			REMOTE SENSING	J	Article	0	Environmental Sciences; Geosciences, Multidisciplinary; Remote Sensing; Imaging Science & Photographic Technology	Hutasavi, S; Chen, DM	[Hutasavi, Sirikul; Chen, Dongmei] Queens Univ, Dept Geog & Planning, Lab Geog Informat & Spatial Anal LaGISA, Kingston, ON K7L 3N6, Canada	10.3390/rs13224654	Rayong, Chonburi, Chachoengsao Province	Thailand
	2021	Evaluation of Optimal Occasional Tilt on Photovoltaic Power Plant Energy Efficiency and Land Use Requirements, Iran	The paper studies the optimum panel horizontal orientation angle toward the Sun and the optimum time interval of the panel's movement. The optimum time intervals or panel movement can change the rate of input energy to the panel surface in Iran. For this purpose, a neural network has been trained to estimate the intensity of solar radiation in Iran. After model validation, the intensity of solar …	solar energy; manual sun tracker; solar energy efficiency; land-use requirements	SOLAR-RADIATION; PV; TRACKING; SYSTEM; PERFORMANCE; TECHNOLOGY; DESIGN	Yes	Confirmed	Utility infrastructure planning	Multi-city study		SUSTAINABILITY	J	Article	0	Green & Sustainable Science & Technology; Environmental Sciences; Environmental Studies	Fathi, A; Ledari, MB; Saboohi, Y	[Fathi, Amirhossein] Shiraz Univ, Sch Mech Engn, Shiraz 7155713876, Iran; [Ledari, Masoomeh Bararzadeh; Saboohi, Yadollah] Sharif Univ Technol, Dept Energy Engn, Azadi Ave, Tehran 111558639, Iran	10.3390/su131810213		Iran
	2020	Grid clustering and fuzzy reinforcement-learning based energy-efficient data aggregation scheme for distributed WSN	The widely acceptable problem in wireless sensor networks (WSNs) is to develop a practical scheme for data aggregation in the massive range of sensor nodes that are randomly distributed over a network region. The essential operation of cluster heads (CHs) in such a network is to transmit the aggregated data to the sink node through multi-hop communication, thus the energy to be used in a better w…	learning (artificial intelligence); pattern clustering; optimisation; wireless sensor networks; fuzzy set theory; telecommunication computing; grid clustering; fuzzy reinforcement-learning based energy-efficient data; distributed WSN; wireless sensor networks; data aggregation; sensor nodes; network region; cluster heads; network lifetime; cluster formation; fuzzy rule system-based reinforcement …	WIRELESS SENSOR NETWORKS	Yes	Confirmed	Utility infrastructure planning			IET COMMUNICATIONS	J	Article	11	Engineering, Electrical & Electronic	Gandhi, GS; Vikas, K; Ratnam, V; Babu, KS	[Sanjay Gandhi, Gundabatini; Vikas, K.; Ratnam, Vijayananda; Suresh Babu, Kolluru] Vasireddy Venkatadri Inst Technol, Dept CSE, Guntur 522508, AP, India	10.1049/iet-com.2019.1005
	2021	Random forest analysis of factors affecting urban carbon emissions in cities within the Yangtze River Economic Belt	China became the country with the largest global carbon emissions in 2007. Cities are regional population and economic centers and are the main sources of carbon emissions. However, factors influencing carbon emissions from cities can vary with geographic location and the development history of the cities, rendering it difficult to explicitly quantify the influence of individual factors on carbon…		DIOXIDE EMISSIONS; ENERGY-CONSUMPTION; DECOMPOSITION ANALYSIS; INDUSTRIAL-STRUCTURE; INTERNATIONAL-TRADE; VARIABLE IMPORTANCE; REGRESSION TREES; CO2 EMISSIONS; CHINA; IMPACT	Yes	Confirmed	CO2 emission/energy consumption prediction	Multi-city study		PLOS ONE	J	Article	1	Multidisciplinary Sciences	Wang, ZH; Zhao, ZJ; Wang, CX	[Wang, Zhaohan; Wang, Chengxin] Shandong Normal Univ, Coll Geog & Environm, Jinan, Shandong, Peoples R China; [Zhao, Zijie] Univ Melbourne, Sch Earth Sci, Melbourne, Vic 3010, Australia; [Zhao, Zijie] Australian Res Council, Ctr Excellence Climate Extremes, Melbourne, Vic, Australia	10.1371/journal.pone.0252337		China
	2020	Application of Artificial Neural Networks for Natural Gas Consumption Forecasting	The present research study explores three types of neural network approaches for forecasting natural gas consumption in fifteen cities throughout Greece; a simple perceptron artificial neural network (ANN), a state-of-the-art Long Short-Term Memory (LSTM), and the proposed deep neural network (DNN). In this research paper, a DNN implementation is proposed where variables related to social aspects…	machine learning; artificial neural networks; natural gas; demand forecasting	FUZZY COGNITIVE MAPS; ELECTRICITY DEMAND; GENETIC ALGORITHM; MODEL; COMBINATION; PERCEPTRON; PREDICTION	Yes	Confirmed	CO2 emission/energy consumption prediction	Multi-city study		SUSTAINABILITY	J	Article	11	Green & Sustainable Science & Technology; Environmental Sciences; Environmental Studies	Anagnostis, A; Papageorgiou, E; Bochtis, D	[Anagnostis, Athanasios; Papageorgiou, Elpiniki; Bochtis, Dionysis] Ctr Res & Technol Hellas CERTH, Inst Bioecon & Agritechnol iBO, GR-57001 Thessaloniki, Greece; [Anagnostis, Athanasios] Univ Thessaly, Dept Comp Sci, GR-35131 Lamia, Greece; [Papageorgiou, Elpiniki] Univ Thessaly, Fac Technol, Dept Energy Syst, Geopolis Campus Ring Rd Larissa Trikala, GR-41500 Larisa, Greece	10.3390/su12166409	Athens, Larissa	Greece
	2021	Rapid Mapping and Annual Dynamic Evaluation of Quality of Urban Green Spaces on Google Earth Engine	In order to achieve the United Nations 2030 Sustainable Development Goals (SDGs) related to green spaces, monitoring dynamic urban green spaces (UGSs) in cities around the world is crucial. Continuous dynamic UGS mapping is challenged by large computation, time consumption, and energy consumption requirements. Therefore, a fast and automated workflow is needed to produce a high-precision UGS map.…	urban green spaces; Google Earth Engine (GEE); Random Forest (RF); Sentinel-2; Beijing; dynamic evaluation	CLASSIFICATION; ACCESSIBILITY; OPTIMIZATION; ASSOCIATIONS; EXTRACTION; PROVISION; SELECTION; TEXTURE; IMAGERY; CITIES	Yes	Confirmed	Zoning/land use/green space			ISPRS INTERNATIONAL JOURNAL OF GEO-INFORMATION	J	Article	0	Computer Science, Information Systems; Geography, Physical; Remote Sensing	Chen, Q; Zhong, CP; Jing, CF; Li, YY; Cao, BL; Cheng, QH	[Chen, Qiang; Zhong, Cuiping; Jing, Changfeng; Li, Yuanyuan; Cao, Beilei; Cheng, Qianhao] Beijing Univ Civil Engn & Architecture, Sch Geomat & Urban Spatial Informat, Beijing 102616, Peoples R China	10.3390/ijgi10100670	Beijing, Chaoyang	China
	2021	A classification approach for urban metabolism using the CART model and its application in China	Exploring resource utilization strategies for different types of cities is essential for achieving the sustainable development of cities. Urban metabolism is a systems-oriented approach to understanding the interrelationship between urban socioeconomic status and natural environment through resource utilization. Recognition and identification of urban metabolic types could help in formulating tar…	Urban metabolism; Classification; CART; Sustainable development; China; Cities	DECISION TREE; ENERGY-CONSUMPTION; REGRESSION; SYSTEM; AREAS; PERSPECTIVE; CITIES; CITY; URBANIZATION; MITIGATION	Yes	Confirmed	Utility infrastructure planning			ECOLOGICAL INDICATORS	J	Article	1	Biodiversity Conservation; Environmental Sciences	Xu, L; Du, HR; Zhang, XL	[Xu, Li; Du, Hongru] Xinjiang Univ, Coll Resource & Environm Sci, Urumqi 830046, Peoples R China; [Xu, Li; Du, Hongru; Zhang, Xiaolei] Chinese Acad Sci, Xinjiang Inst Ecol & Geog, Urumqi 830011, Peoples R China; [Xu, Li; Du, Hongru; Zhang, Xiaolei] Univ Chinese Acad Sci, Beijing 100049, Peoples R China	10.1016/j.ecolind.2021.107345		China
	2020	A spatial finer electric load estimation method based on night-light satellite image	As a fundamental parameter of the electric grid, obtaining spatial electric load distribution is the premise and basis for numerous studies. As a public, world-wide, and spatialized dataset, NPP/VIIRS night-light satellite image has been long used for socio-economic information estimation, including electric consumption, while little attention has been given to the electric load estimation. Addit…	Night-light image; Electric load; Spatial scale; Super-resolution; Deep learning	SIMULTANEOUS-OPTIMIZATION; SPATIOTEMPORAL PATTERNS; ENERGY-CONSUMPTION; POWER CONSUMPTION; ECONOMIC-ACTIVITY; POPULATION; FLOW	Yes	Confirmed	CO2 emission/energy consumption prediction			ENERGY	J	Article	2	Thermodynamics; Energy & Fuels	Li, PR; Zhang, HR; Wang, X; Song, X; Shibasaki, R	[Li, Peiran; Zhang, Haoran; Song, Xuan; Shibasaki, Ryosuke] Univ Tokyo, Ctr Spatial Informat Sci, 5-1-5 Kashiwanoha, Kashiwa, Chiba 2778568, Japan; [Wang, Xin] Tongji Univ, Coll Architecture & Urban Planning, MOE Joint Int Res Lab Eco Urban Design, 1239 Siping Rd, Shanghai 200092, Peoples R China	10.1016/j.energy.2020.118475	Shanghai	China
	2020	An Energy-Efficient, Parallel Neighborhood and Adaptation Functions for Hardware Implemented Self-Organizing Maps Applied in Smart Grid	Smart Grids (SGs) can be successfully supported by Wireless Sensor Networks (WSNs), especially through these consisting of intelligent sensors, which are able to efficiently process the still growing amount of data. We propose a contribution to the development of such intelligent sensors, which in an advanced version can be equipped with embedded low-power artificial neural networks (ANNs), suppo…	smart grid; intelligent sensors; artificial neural networks; parallel data processing; ASIC; CMOS technology	SENSOR NETWORKS; ARCHITECTURE; CHALLENGES; COVERAGE	Yes	Confirmed	Utility infrastructure planning			ENERGIES	J	Article	2	Energy & Fuels	Kolasa, M	[Kolasa, Marta] UTP Univ Sci & Technol, Fac Telecommun Comp Sci & Elect Engn, Ul Kaliskiego 7, PL-85796 Bydgoszcz, Poland	10.3390/en13051197
	2021	A Deep Learning and GIS Approach for the Optimal Positioning of Wave Energy Converters	Renewable Energy Sources provide a viable solution to the problem of ever-increasing climate change. For this reason, several countries focus on electricity production using alternative sources. In this paper, the optimal positioning of the installation of wave energy converters is examined taking into account geospatial and technical limitations. Geospatial constraints depend on Land Use classes…	wave energy converters; deep neural networks; renewable energy sources; spatial planning; sentinel satellite imagery	SITE SELECTION; OFFSHORE WIND; SYSTEMS	Yes	Confirmed	Utility infrastructure planning	Modeling method contribution		ENERGIES	J	Article	0	Energy & Fuels	Batsis, G; Partsinevelos, P; Stavrakakis, G	[Batsis, Georgios; Stavrakakis, Georgios] Tech Univ Crete, Sch Elect & Comp Engn, Khania 73100, Greece; [Partsinevelos, Panagiotis] Tech Univ Crete, Senselab Res, Sch Mineral Resources Engn, Khania 73100, Greece	10.3390/en14206773	Sines	Portugal
	2020	Estimation of anthropogenic heat emissions in China using Cubist with points-of-interest and multisource remote sensing data	Rapid urbanization and industrialization in China stimulated the great increase of energy consumption, which leads to drastic rise in the emission of anthropogenic waste heat. Anthropogenic heat emission (AHE) is a crucial component of urban energy budget and has direct implications for investigating urban climate and environment. However, reliable and accurate representation of AHE across China …	Anthropogenic heat; Cubist; Points-of-interest; Remote sensing; China	URBAN LAND-USE; RANDOM FORESTS; AIR-QUALITY; REGIONAL METEOROLOGY; CLIMATE; IMPACTS; ISLAND; MODEL; CITY; FLUX	Yes	Confirmed	Zoning/land use/green space			ENVIRONMENTAL POLLUTION	J	Article	12	Environmental Sciences	Chen, Q; Yang, XC; Ouyang, ZT; Zhao, NZ; Jiang, QT; Ye, TT; Qi, J; Yue, WZ	[Chen, Qian; Yang, Xuchao; Jiang, Qutu; Ye, Tingting] Zhejiang Univ, Ocean Coll, Zhoushan Campus,Haike Bldg 357,1 Zheda Rd, Zhoushan 316021, Peoples R China; [Ouyang, Zutao] Stanford Univ, Dept Earth Syst Sci, Stanford, CA 94305 USA; [Zhao, Naizhuo] Northeastern Univ, Sch Humanities & Law, Inst Land Resource Management, Shenyang, Peoples R China; [Zhao, Naizhuo] McGill Univ, Div Clin Epidemiol, H…	10.1016/j.envpol.2020.115183		China
	2020	Deep learning: To better understand how human activities affect the value of ecosystem services-A case study of Nanjing	The value of ecosystem services is affected by increasing human activities. However, the anthropogenic driving mechanisms of ecosystem services are poorly understood. Here, we established a deep learning model to approximate the ecosystem service value (ESV) of Nanjing City using 23 socioeconomic factors. A multi-view analysis was then conducted on feasible impact mechanisms using model disassemb…		URBANIZATION; BUNDLES; IMPACTS; AREAS; CITY; NEED	Yes	Confirmed	Zoning/land use/green space			PLOS ONE	J	Article	0	Multidisciplinary Sciences	Liu, C; Qi, Y; Wang, ZB; Yu, JL; Li, S; Yao, H; Ni, TH	[Liu, Chang; Yu, Junlan; Li, Shan; Ni, Tianhua] Nanjing Univ, Sch Geog & Ocean Sci, Nanjing, Peoples R China; [Qi, Yi] Nanjing Univ, Sch Architecture & Urban Planning, Nanjing, Peoples R China; [Wang, Zhenbo] Chinese Acad Sci, Inst Geog Sci & Nat Resources Res, Beijing, Peoples R China; [Yao, Hong] Nantong Univ, Sch Geog, Nantong, Peoples R China	10.1371/journal.pone.0238789	Nanjing	China
	2022	Research of Carbon Emission Reduction Potentials in the Yellow River Basin, Based on Cluster Analysis and the Logarithmic Mean Divisia Index (LMDI) Method	China has implemented many green transition policies to reach its carbon peak target, some of which do not consider the actual carbon reduction pressures that localities can afford, thus lowering the living standards of residents and economic growth, which makes the green transition process unsustainable. The Yellow River Basin plays an important role in China's energy, food, manufacturing, and e…	Yellow River; carbon emission reduction potential; cluster analysis	CO2 EMISSIONS; DECOMPOSITION ANALYSIS; ENERGY; INTENSITY; STIRPAT; CHINA; SEQUESTRATION; GROWTH; IMPACT	Yes	Confirmed	CO2 emission/energy consumption prediction			SUSTAINABILITY	J	Article	0	Green & Sustainable Science & Technology; Environmental Sciences; Environmental Studies	Li, JC; Li, MG	[Li, Jingcheng] Beijing Jiaotong Univ, Sch Econ & Management, Beijing 100044, Peoples R China; [Li, Jingcheng; Li, Menggang] Beijing Jiaotong Univ, Beijing Lab Natl Econ Secur Early Warning Engn, Beijing 100044, Peoples R China	10.3390/su14095284		China
	2022	A Clustering Approach for the Optimal Siting of Recharging Stations in the Electric Vehicle Routing Problem with Time Windows	Transportation has been incorporating electric vehicles (EVs) progressively. EVs do not produce air or noise pollution, and they have high energy efficiency and low maintenance costs. In this context, the development of efficient techniques to overcome the vehicle routing problem becomes crucial with the proliferation of EVs. The vehicle routing problem concerns the freight capacity and battery a…	charging stations; electric vehicles; k-means algorithm; location routing problem with time windows; mixed-integer linear programming; vehicle routing	LOCATION	Yes	Confirmed	Charging infrastructure			ENERGIES	J	Article	0	Energy & Fuels	Sanchez, DG; Tabares, A; Faria, LT; Rivera, JC; Franco, JF	[Sanchez, Danny Garcia; Franco, John Fredy] Sao Paulo State Univ UNESP, Dept Elect Engn, BR-15385000 Ilha Solteira, SP, Brazil; [Tabares, Alejandra] Los Andes Univ, Dept Ind Engn, Bogota 111711, Colombia; [Faria, Lucas Teles; Franco, John Fredy] Sao Paulo State Univ UNESP, Dept Energy Engn, BR-19274000 Rosana, SP, Brazil; [Rivera, Juan Carlos] EAFIT Univ, Dept Math Sci, Medellin 050022, Colombia	10.3390/en15072372
	2020	Quick energy prediction and comparison of options at the early design stage	The energy-efficient building design requires building performance simulation (BPS) to compare multiple design options for their energy performance. However, at the early stage, BPS is often ignored, due to uncertainty, lack of details, and computational time. This article studies probabilistic and deterministic approaches to treat uncertainty; detailed and simplified zoning for creating zones; a…	Probabilistic; Zoning; Energy simulation; Machine learning; Prediction gap; Building Information Modelling (BIM)	BUILDING PERFORMANCE SIMULATION; MULTICRITERIA DECISION-MAKING; SPACE EXPLORATION; UNCERTAINTY; BIM; INFORMATION; FRAMEWORK; IMPLEMENTATION; METHODOLOGY; CONSUMPTION	Yes	Confirmed	CO2 emission/energy consumption prediction	Modeling method contribution	building-level	ADVANCED ENGINEERING INFORMATICS	J	Article	7	Computer Science, Artificial Intelligence; Engineering, Multidisciplinary	Singh, MM; Singaravel, S; Klein, R; Geyer, P	[Singh, Manav Mahan; Singaravel, Sundaravelpandian; Geyer, Philipp] Katholieke Univ Leuven, Dept Architecture, Kasteelpk Arenberg 1, B-3001 Leuven, Belgium; [Klein, Ralf] Katholieke Univ Leuven, Bldg Phys & Sustainable Design, Ghent & Aalst Technol Campuses, B-9000 Ghent, Belgium; [Geyer, Philipp] Berlin Univ Technol, Digital Architecture & Sustainabil Grp, Str 17 Juni 152,A61, D-10623 Berlin, Ge…	10.1016/j.aei.2020.101185	Munich	Germany
	2020	Novel electricity pattern identification system based on improved I-nice algorithm	As a result of the rapid increase in smart-metre popularity, a large volume of smart electricity data has been generated. The underlying information contained within such data sets is very helpful and useful to businesses and power companies. However, effective mining of this valuable knowledge is challenging for both industry and academia. Current research mainly focuses on application of statis…	Smart metres; Smart electricity data; Electricity pattern identification; I-nice clustering; Kernel density estimation	ENERGY-CONSUMPTION; LOAD PROFILE; URBAN; MODEL	Yes	Confirmed				COMPUTERS & INDUSTRIAL ENGINEERING	J	Article	1	Computer Science, Interdisciplinary Applications; Engineering, Industrial	He, YL; Qin, HL; Huang, JZ; Jin, Y	[He, Yu-Lin; Qin, Hong-Lian; Huang, Joshua Zhexue] Shenzhen Univ, Coll Comp Sci & Software Engn, Big Data Inst, Shenzhen 518060, Peoples R China; [He, Yu-Lin; Qin, Hong-Lian; Huang, Joshua Zhexue] Shenzhen Univ, Natl Engn Lab Big Data Syst Comp Technol, Shenzhen 518060, Peoples R China; [He, Yu-Lin; Huang, Joshua Zhexue] Shenzhen Univ, Guangdong Lab Artificial Intelligence & Digital E, Shenzhen 5…	10.1016/j.cie.2020.106908
	2020	Spatial Variation of Land Use/Cover Composition and Impact on Surface Urban Heat Island in a Tropical Sub-Saharan City of Accra, Ghana	Rapid urbanization is one of the most crucial issues in the world of the 21st century. Notably, the urban heat island phenomenon is becoming more prominent in megacities and their hinterlands in temperate and subtropical climatic regions. In the daytime in summer, there exists a high possibility of accelerating the land surface temperature (LST) in desert cities, due to the alterations made by hu…	urban heat island; land surface temperature; Accra; urban landscape pattern; tasseled cap transformation; sustainable cities	ENVIRONMENTAL DEGRADATION; ENERGY-CONSUMPTION; TEMPERATURE; URBANIZATION; PATTERN; LANDSCAPE; COVER; CHINA; CONFIGURATION; PHOENIX	Yes	Confirmed	Zoning/land use/green space			SUSTAINABILITY	J	Article	10	Green & Sustainable Science & Technology; Environmental Sciences; Environmental Studies	Athukorala, D; Murayama, Y	[Athukorala, Darshana] Univ Tsukuba, Grad Sch Life & Environm Sci, 1-1-1 Tennodai, Tsukuba, Ibaraki 3058572, Japan; [Murayama, Yuji] Univ Tsukuba, Fac Life & Environm Sci, 1-1-1 Tennodai, Tsukuba, Ibaraki 3058572, Japan	10.3390/su12197953	Accra	Ghana
	2021	Modeling urban evapotranspiration using remote sensing, flux footprints, and artificial intelligence	As climate change progresses, urban areas are increasingly affected by water scarcity and the urban heat island effect. Evapotranspiration (ET) is a crucial component of urban greening initiatives of cities worldwide aimed at mitigating these issues. However, ET estimation methods in urban areas have so far been limited. An expanding number of flux towers in urban environments provide the opportu…	Urban water; Eddy covariance; Latent heat flux; 1D convolutional neural networks (CNN); Deep learning; Harmonized Landsat and Sentinel-2	EDDY COVARIANCE CO2; ENERGY-BALANCE; HEAT WAVES; WATER REQUIREMENTS; SURFACE; LANDSCAPE; BERLIN; AREA; VALIDATION; EXCHANGES	Yes	Confirmed	Zoning/land use/green space	Modeling method contribution		SCIENCE OF THE TOTAL ENVIRONMENT	J	Article	10	Environmental Sciences	Vulova, S; Meier, F; Rocha, AD; Quanz, J; Nouri, H; Kleinschmit, B	[Vulova, Stenka; Rocha, Alby Duarte; Kleinschmit, Birgit] Tech Univ Berlin, Dept Landscape Architecture & Environm Planning, Geoinformat Environm Planning Lab, D-10623 Berlin, Germany; [Meier, Fred; Quanz, Justus] Tech Univ Berlin, Inst Ecol, Chair Climatol, D-12165 Berlin, Germany; [Quanz, Justus] HafenC Univ Hamburg, Dept Environmentally Sound Urban & Infrastruct Pl, D-20457 Hamburg, Germany; […	10.1016/j.scitotenv.2021.147293	Berlin	Germany
	2021	A city-scale estimation of rooftop solar photovoltaic potential based on deep learning	The estimation of rooftop solar photovoltaic (PV) potential is crucial for policymaking around sustainable energy plans. But it is difficult to accurately estimate the availability of rooftop area for solar radiation on a city-scale. In this study, a generic framework for estimating the rooftop solar PV potential on a city-scale using publicly available high-resolution satellite images is propose…	rooftop solar photovoltaic (PV) potential; geographic information systems (GIS); Deep learning; Sampling strategy; City-scale	LIDAR DATA; ENERGY; METHODOLOGY; TECHNOLOGY; RADIATION; INDUSTRY; FACADES; FOREST; AREA	Yes	Confirmed	Utility infrastructure planning	Urban/neighborhood design		APPLIED ENERGY	J	Article	8	Energy & Fuels; Engineering, Chemical	Zhong, T; Zhang, ZX; Chen, M; Zhang, K; Zhou, ZX; Zhu, R; Wang, YJ; Lu, GN; Yan, JY	[Zhong, Teng; Zhang, Zhixin; Chen, Min; Zhang, Kai; Zhou, Zixuan; Wang, Yijie; Lu, Guonian] Nanjing Normal Univ, Minist Educ PRC, Key Lab Virtual Geog Environm, Nanjing 210023, Peoples R China; [Zhong, Teng; Zhang, Zhixin; Chen, Min; Zhang, Kai; Zhou, Zixuan; Wang, Yijie; Lu, Guonian] State Key Lab Cultivat Base Geog Environm Evolut, Nanjing 210023, Peoples R China; [Zhong, Teng; Zhang, Zhixin; C…	10.1016/j.apenergy.2021.117132	Nanjing	China
	2021	Estimation of the losses in potential concentrated solar thermal power electricity production due to air pollution in China	The concentrated solar thermal power (CSP) industry is projected to expand rapidly in China in the next 30 years. However, anthropogenic aerosol emissions reduce direct radiation (Rdir) reaching the surface, resulting in the losses of potential CSP electricity production in China. In this study, we applied various models to estimate daily Rdir, and the results showed that the gradient boosting wi…	Direct radiation; Concentrating solar thermal power; Air pollution; Potential electricity production; China	BROAD-BAND MODELS; ARTIFICIAL-INTELLIGENCE; IRRADIANCE PREDICTIONS; DECADAL VARIABILITY; RADIATION RECORDS; ENERGY PRODUCTION; EMPIRICAL-MODELS; TREND ANALYSIS; IMPACT; TRANSMITTANCE	Yes	Confirmed	Urban/neighborhood design	CO2 emission/energy consumption prediction		SCIENCE OF THE TOTAL ENVIRONMENT	J	Article	1	Environmental Sciences	Zhou, ZG; Lin, AW; Wang, LC; Qin, WM; Zhao, L; Sun, S; Zhong, Y; He, LJ; Chen, FY	[Zhou, Zhigao; Lin, Aiwen; Zhao, Lin; Zhong, Yang; He, Lijie] Wuhan Univ, Sch Resource & Environm Sci, Wuhan 430079, Peoples R China; [Wang, Lunche; Qin, Wenmin] China Univ Geosci, Sch Geog & Informat Engn, Wuhan 430074, Peoples R China; [Sun, Shao] China Meteorol Adm, Natl Climate Ctr, Beijing 100081, Peoples R China; [Chen, Feiyan] Xinyang Normal Univ, Sch Geog Sci, Xinyang 464000, Peoples R Ch…	10.1016/j.scitotenv.2021.147214		China
	2021	Deep learning for the prediction and classification of land use and land cover changes using deep convolutional neural network	The importance of timely and accurate information about the land resources and the natural resources increased rapidly. Due to the impact of urbanization, the we face hasty climatic change. To mitigate the urban heat island in the developed and developing cities, a very accurate land cover classification has to be developed. Through which we can identify the changes in build-up areas, water bodie…	Land use; Land cover; Changes; Satellite; Encoding; Decoding; HEVGG; Classification; Prediction		Yes	Confirmed	Zoning/land use/green space	Modeling method contribution		ECOLOGICAL INFORMATICS	J	Article	1	Ecology	Jagannathan, J; Divya, C	[Jagannathan, J.; Divya, C.] Manonmaniam Sundaranar Univ, Ctr Informat Technol & Engn, Tirunelveli, India	10.1016/j.ecoinf.2021.101412	Chennai	India
	2021	Urban Sub-Center Design Framework Based on theWalkability Evaluation Method: Taking Coomera Town Sub-Center as an Example	As current society's reflection on the rapid development of motorization and increasing emphasis on the ecological environment, the study of walkable cities has become one of the key points of urban sustainable design. Creating a walkable city is an effective way to build a low-carbon and healthy city. With the development of cities, walkability concepts and theories are constantly being given ne…	walkability; urban sustainability; walkability evaluation; urban sub-center	WALKABILITY; COMMUNITY; DENSITY; IMPACT; CITY	Yes	Confirmed	Street network design	Micromobility	Urban/neighborhood design	SUSTAINABILITY	J	Article	0	Green & Sustainable Science & Technology; Environmental Sciences; Environmental Studies	Shao, JZ; Yang, MG; Liu, G; Li, Y; Luo, D; Tan, YR; Zhang, YX; Song, QZ	[Shao, Jizhong; Yang, Minge; Liu, Guan; Li, Ye; Luo, Dan; Tan, Yanran; Zhang, Yuxin] Huazhong Agr Univ, Landscape Architecture Dept, Wuhan 430070, Peoples R China; [Shao, Jizhong; Song, Qize] Nanjing Tech Univ, Sch Architecture, Nanjing 211816, Peoples R China	10.3390/su13116259		Australia
	2021	Quantifying coastal flood vulnerability for climate adaptation policy using principal component analysis	With increasing population growth and urban sprawl, many coastal lowlands are unprecedentedly vulnerable to climate change and its impacts, such as rising sea levels, increasing extreme storm events, and coastal flooding. Quantifying coastal flood vulnerability serves as a tool to identify a system's weakness, monitor its change, and support making targeted climate adaptation policies. The assess…	Coastal flood; Vulnerability indicator; Climate change; Principal component analysis; Adaptation policy	SUSTAINABLE DEVELOPMENT; ADAPTIVE CAPACITY; COMPOSITE INDEX; INDICATORS; RESILIENCE; DECISION; RISK	Yes	Confirmed	Spatial configurations/travel patterns	Zoning/land use/green space	Multi-city study	ECOLOGICAL INDICATORS	J	Article	4	Biodiversity Conservation; Environmental Sciences	Wu, T	[Wu, Tao] Univ Connecticut, Dept Plant Sci & Landscape Architecture, 1376 Storrs Rd, Storrs, CT 06269 USA; [Wu, Tao] Nanjing Agr Univ, Fac Dept Landscape Architecture, 1 Weigang, Nanjing 210095, Jiangsu, Peoples R China	10.1016/j.ecolind.2021.108006	Connecticut	USA
	2021	Impacts of urbanization and long-term meteorological variations on global PM2.(5) and its associated health burden	PM2.5 pollution has adverse health effects on humans. Urbanization and long-term meteorological variations play important roles in influencing the PM2.5 concentration and its associated health effects. Our results indicate that the urbanization process can enhance the PM2.5 concentration globally. The PM2.5 caused mortality density (deaths/100 km(2)) is also positively correlated with the urbaniz…	Global PM2.5; Urbanization; Mortality density; Machine learning; Meteorological variation; Climate	PARTICULATE MATTER; AIR-QUALITY; CHINA; COMBUSTION; EMISSIONS; POLLUTION; REGION; HAZE	Yes	Confirmed	CO2 emission/energy consumption prediction	Urban/neighborhood design		ENVIRONMENTAL POLLUTION	J	Article	6	Environmental Sciences	Lu, XC; Yuan, DH; Chen, Y; Fung, JCH	[Lu, Xingcheng; Chen, Yiang; Fung, Jimmy C. H.] Hong Kong Univ Sci & Technol, Div Environm & Sustainabil, Clear Water Bay, Hong Kong, Peoples R China; [Yuan, Dehao; Fung, Jimmy C. H.] Hong Kong Univ Sci & Technol, Dept Math, Clear Water Bay, Hong Kong, Peoples R China	10.1016/j.envpol.2020.116003
	2019	3D Modeling of URBAN Environment for Efficient Renewable ENERGY Production in the Smart CITY	One of the major challenges faced by the humanity in the next century is the CLIMATE change and global warming. CLIMATE change is caUSED by the rapid emission of GREENHOUSE GASES. ENERGY production indUSTRY is facing the challenge of providing the ENERGY require by the rapidly expanding need of URBANized societies while REDUCING their emission. Clean and renewable ENERGY sources such as solar and…	3D modelling; Computer simulation; Renewable ENERGY; DEEP LEARNING; Smart CITY		Yes	Confirmed	Data provision/imputation	Siting (others than buildings)		2019 7th iranian joint congress on fuzzy and intelligent systems (cfis)	B	Proceedings Paper	0	Computer Science, Artificial Intelligence; Engineering, Electrical & Electronic	Anbari, S; Majidi, B; Movaghar, A	[Anbari, Shiva; Majidi, Babak; Movaghar, Ali] Khatam Univ, Dept Comp Engn, Tehran, Iran	10.1109/CFIS.2019.8692154		Iran
	2021	Dynamic Changes in Community Deprivation of Access to Urban Green Spaces by Multiple Transport Modes	Urban green spaces (UGSs) improve the quality of life of urban inhabitants. With the acceleration of urbanization and changes in traffic networks, it remains unclear whether changes in the distribution of UGSs can satisfy the needs of all inhabitants and offer equal services to inhabitants from different socioeconomic backgrounds. This study addresses this issue by analyzing dynamic changes in UG…	urban green spaces; dynamic changes; deprivation; multiple transportation modes; distribution disparity	PARK AVAILABILITY; SPATIAL EQUITY; SOCIAL INEQUALITIES; ECOSYSTEM SERVICES; POLITICAL-ECONOMY; ACCESSIBILITY; QUALITY; CITY; NEIGHBORHOODS; PERCEPTIONS	Yes		Zoning/land use/green space				J	Article	0	Public, Environmental & Occupational Health	Cheng, SQ; Liao, ZQ; Zhu, Y	[Cheng, Shunqi; Zhu, Yu] Fujian Normal Univ, Inst Geog, Fuzhou, Peoples R China; [Liao, Zhiqiang] Fujian Mapping Inst, Fuzhou, Peoples R China; [Zhu, Yu] Shanghai Univ, Asian Demog Res Inst, Shanghai, Peoples R China; [Zhu, Yu] Fujian Normal Univ, Minist Sci & Technol & Fujian Prov, State Key Lab Subtrop Mt Ecol, Fuzhou, Peoples R China	10.3389/fpubh.2021.615432	Fuzhou	China
	2021	A human-centred assessment framework to prioritise heat mitigation efforts for active travel at city scale	Hot weather not only impacts upon human physical comfort and health, but also impacts the way that people access and experience active travel options such as walking and cycling. By evaluating the street thermal environment of a city alongside an assessment of those communities that are the most vulnerable to the effects of heat, we can prioritise areas in which heat mitigation interventions are …	Tree shade; Sky view factor (SVF); Heat vulnerability index (HVI); Deep teaming; Active travel; GIS	SKY VIEW FACTOR; THERMAL COMFORT; NEIGHBORHOOD WALKABILITY; URBAN CLIMATE; HUMAN HEALTH; TREE COVER; IMPACT; ISLAND; VULNERABILITY; TEMPERATURE	Yes		Zoning/land use/green space				J	Article	5	Environmental Sciences	Sun, Q; Macleod, T; Both, A; Hurley, J; Butt, A; Amati, M	[Sun, Qian (Chayn)] RMIT Univ, Sch Sci, Geospatial Sci, GPO Box 2476V, Melbourne, Vic 3001, Australia; [Macleod, Tania] City Greater Bendigo, Urban Planner, Victoria, Australia; [Both, Alan; Hurley, Joe; Butt, Andrew; Amati, Marco] RMIT Univ, Ctr Urban Res, Melbourne, Vic, Australia; [Hurley, Joe; Butt, Andrew; Amati, Marco] RMIT Univ, Global Urban & Social Studies, Melbourne, Vic, Australia; [Su…	10.1016/j.scitotenv.2020.143033
	2021	The Traj2Vec model to quantify residents' spatial trajectories and estimate the proportions of URBAN LAND-USE types	The formulation of mixed URBAN LAND USES is not only intended to find the ideal scenario of LAND USE but also reGARDED as a way TOWARD sUSTAINABLE URBAN development. We propose a geo-semantic mining approach Traj2Vec to quantify the trajectories of residents as high-dimensional semantic vectors. Then, a RANDOM FOREST (RF) method is USED to model the relationship between the semantic vectors and m…	Mixed URBAN LAND-USE patterns; mobile phone positioning data; residents' spatial trajectories; traj2vec; geo-semantic mining	social media data; mobile phone; scene classification; points; time; areas	Yes	Confirmed	Spatial configurations/travel patterns	Zoning/land use/green space		International journal of geographical information science	J	Article; Early Access	0	Computer Science, Information Systems; Geography; Geography, Physical; Information Science & Library Science	Zhang, JB; Li, X; Yao, Y; Hong, Y; He, JY; Jiang, ZW; Sun, JC	[Zhang, Jinbao; He, Jialyu] Sun Yat Sen Univ, Sch Geog & Planning, Guangdong Key Lab Urbanizat & Geosimulat, Guangzhou, Peoples R China; [Li, Xia] East China Normal Univ, Sch Geog Sci, Key Lab Geog Informat Sci, Minist Educ, Shanghai, Peoples R China; [Yao, Yao] China Univ Geosci, Sch Geog & Informat Engn, Wuhan, Peoples R China; [Hong, Ye] Swiss Fed Inst Technol, Dept Civil Environm & Geomat Eng…	10.1080/13658816.2020.1726923	Shenzhen	China
	2020	Integrating Remote Sensing and STREET View Images to Quantify URBAN FOREST Ecosystem Services	There is an urgent need for holistic tools to assess the health impacts of CLIMATE change MITIGATION and adaptation POLICIES relating to increasing public green spaces. URBAN VEGETATION provides numerous ecosystem services on a local scale and is therefore a potential adaptation strategy that can be USED in an era of global warming to offset the increasing impacts of human activity on URBAN envir…	URBAN FOREST; LANDSCAPE meTRICS; LiDAR; aerial images; STREET view images; semantic segmentation; convolutional NEURAL NETWORK (CNN); spatial clUSTERING	spatial-pattern; green space; TREE; regionalization; VEGETATION; LANDSCAPE; quality; impact; risk; form	Yes	Confirmed	Zoning/land use/green space			Remote sensing	J	Article	0	Remote Sensing	Barbierato, E; Bernetti, I; Capecchi, I; Saragosa, C	[Barbierato, Elena; Bernetti, Iacopo; Capecchi, Irene] Univ Florence, Dept Agr Food Environm & Forestry, Piazzale Cascine 18, I-50144 Florence, Italy; [Saragosa, Claudio] Univ Florence, Dept Architecture, Via Mattonaia 14, I-50121 Florence, Italy	10.3390/rs12020329	Viareggio	Italy
	2019	USING Real-Time ElecTRICITY Prices to Leverage ElecTRICAL ENERGY Storage and Flexible Loads in a Smart Grid Environment Utilizing MACHINE LEARNING Techniques	With exposure to real-time market pricing sTRUCTURES, consumers would be incentivized to invest in elecTRICAL ENERGY storage systems and smart predictive automation of their HOME ENERGY systems. Smart HOME automation through optimizing HVAC (heating, ventilation, and air conditioning) temperature set points, along with disTRIBUTED ENERGY storage, could be utilized in the process of optimizing the…	ENERGY storage; smart grid; renewable ENERGY; solar ENERGY; smart HOUSES; dynamic real-time optimization; MACHINE LEARNING; artificial NEURAL NETWORKS; real-time pricing; duck curve	DEMAND-side management; optimization; system; ARCHITECTURE; prediction; VEHICLES; model	Yes	Confirmed	CO2 emission/energy consumption prediction	Demand response		Processes	J	Article	0	Engineering, Chemical	Sheha, M; Powell, K	[Sheha, Moataz; Powell, Kody] Univ Utah, Dept Chem Engn, Salt Lake City, UT 84112 USA	10.3390/pr7120870
	2019	An integrated data-DRIVEN framework for URBAN ENERGY USE modeling (UEUM)	Many URBAN ENERGY USE modeling tools and methods have been developed to understand ENERGY USE in CITIES, but often have limitations in aggregating across multiple scales and end-USES, which adversely affects accuracy and utility. Increased data availability and developments in MACHINE LEARNING (ML) provide new possibilities for improving the accuracy and complexity of URBAN ENERGY USE models. Thi…	URBAN ENERGY USE modeling; Data-DRIVEN; BUILDING operational ENERGY; TRANSPORTATION ENERGY; URBAN socio-spatial patterns; MACHINE LEARNING	artificial neural-networks; BUILDING ENERGY; socioeconomic-factors; elecTRICITY CONSUMPTION; occupant behavior; input-variables; performance; DEMAND; simulation; regression	Yes	Confirmed	CO2 emission/energy consumption prediction			Applied energy	J	Article	0	Energy & Fuels; Engineering, Chemical	Abbasabadi, N; Ashayeri, M; Azari, R; Stephens, B; Heidarinejad, M	[Abbasabadi, Narjes; Ashayeri, Mehdi; Azari, Rahman] IIT, Coll Architecture, 3360 S State St, Chicago, IL 60616 USA; [Stephens, Brent; Heidarinejad, Mohammad] IIT, Dept Civil Architectural & Environm Engn, 3201 S Dearborn St, Chicago, IL 60616 USA	10.1016/j.apenergy.2019.113550	Chicago	USA
	2019	Examining threshold effects of BUILT ENVIRONMENT elements on TRAVEL-related CARbon-dioxide emissions	Understanding how BUILT ENVIRONMENT features are associated with TRAVEL-related CARbon-dioxide (CO2) emissions is essential for pLANNERS to encourage environmentally sUSTAINABLE TRAVEL through TRANSPORTATION and LAND USE POLICIES. Applying GRADIENT BOOSTING decision TREES to the data from the MinneaPOLIS-St. Paul METROPOLITAN area, this study addresses two gaps in the literature by identifying cr…	URBAN FORM; TRAVEL behavior; CLIMATE change; GREENHOUSE GAS emissions; MACHINE LEARNING	HOUSEHOLD VEHICLE emissions; LAND-USE; co2 emissions; NEIGHBORHOOD; insights; behavior; impact; form; link	Yes	Confirmed	Spatial configurations/travel patterns	Zoning/land use/green space		Transportation research part d-transport and environment	J	Article	1	Environmental Studies; Transportation; Transportation Science & Technology	Wu, XY; Tao, T; Cao, JS; Fan, YL; Ramaswami, A	[Wu, Xinyi; Tao, Tao; Cao, Jason; Fan, Yingling; Ramaswami, Anu] Univ Minnesota Twin Cities, Humphrey Sch Publ Affairs, 301 19th Ave South, Minneapolis, MN 55455 USA	10.1016/j.trd.2019.08.018	Minneapolis	USA
	2019	Spatial-temporal inference of URBAN TRAFFIC emissions based on TAXI trajectories and multi-source URBAN data	VEHICLE trajectory data collected via GPS-enabled devices have played increasingly important roles in estimating network-wide TRAFFIC, given their bROAD spatial-temporal coverage and representativeness of TRAFFIC dynamics. This paper exploits TAXI GPS data, license plate recognition (LPR) data, and geographical information for reconsTRUCTING the spatial and temporal patterns of URBAN TRAFFIC emis…	Spatial-temporal emission pattern; TAXI trajectories; GPS; Multi-source data	FUEL CONSUMPTION; PASSENGER CARS; inventories; VEHICLES; model; china; nox	Yes	Confirmed	CO2 emission/energy consumption prediction	Spatial configurations/travel patterns		Transportation research part c-emerging technologies	J	Article	3	Transportation Science & Technology	Liu, JL; Han, K; Chen, XQ; Ong, GP	[Liu, Jielun; Ong, Ghim Ping] Natl Univ Singapore, Dept Civil & Environm Engn, Singapore 117576, Singapore; [Han, Ke] Imperial Coll London, Dept Civil & Environm Engn, Ctr Transport Studies, London SW7 2BU, England; [Chen, Xiqun (Michael)] Zhejiang Univ, Coll Civil Engn & Architecture, B828 Anzhong Bldg,866 Yuhangtang Rd, Hangzhou 310058, Zhejiang, Peoples R China	10.1016/j.trc.2019.07.005	Hangzhou	China
	2019	Downscaling of URBAN LAND Surface Temperature Based on Multi-Factor Geographically Weighted Regression	LAND surface temperature (LST) is an important input parameter to characterize URBAN environmental heat change. Existing satellite-borne thermal infrared sensor technology cannot completely support the applications USING high spatial resolution LST, such as analysis of URBAN thermal environment and ENERGY CONSUMPTION assessment. Downscaling LST is an alternative method to reTRIEVE LST of high spa…	Factor selection; geographically weighted regression; spatial non-STATIONARITY; URBAN LAND surface temperature downscaling	heat-isLAND; VEGETATION index; disaggregation; algorithm; cover; area	Yes	Confirmed	Data provision/imputation			Ieee journal of selected topics in applied earth observations and remote sensing	J	Article	0	Engineering, Electrical & Electronic; Geography, Physical; Remote Sensing; Imaging Science & Photographic Technology	Wu, JH; Zhong, B; Tian, SF; Yang, AX; Wu, JJ	[Wu, Jinhua; Zhong, Bo; Yang, Aixia; Wu, Junjun] Chinese Acad Sci, Inst Remote Sensing & Digital Earth, State Key Lab Remote Sensing Sci, Beijing 100101, Peoples R China; [Wu, Jinhua; Tian, Shufang] China Univ Geosci, Sch Earth Sci & Resources, Beijing 100083, Peoples R China	10.1109/JSTARS.2019.2919936
	2019	Creating an emission model based on portable emission measurement system for the purpose of a roundabout	ROAD TRANSPORT is the main source of pollution to the environment in URBAN areas; therefore, there is a need to accurately estimate the amount of exhaUST gases emitted by motor VEHICLES. The development of systems for measuring emissions of exhaUST gases caUSED the exit from STATIONARY chassis dynamometers to real ROAD test. This paper presents an analysis of emission data from the PEMS system fo…	Air pollution; Roundabout emission modeling; VEHICLE emission; ExhaUST measurements; Portable emissions measurement systems (PEMS)	VEHICLE FUEL CONSUMPTION; exhaUST emissions; intersections; acceleration; signal; co2	Yes	Confirmed	CO2 emission/energy consumption prediction			Environmental science and pollution research	J	Article	1	Environmental Sciences	Jaworski, A; Madziel, M; Lejda, K	[Jaworski, Artur; Madziel, Maksymilian; Lejda, Kazimierz] Rzeszow Univ Technol, Dept Combust Engines & Transport, Fac Mech Engn & Aeronaut, 8 Powstancow Warszawy Ave, PL-35959 Rzeszow, Poland	10.1007/s11356-019-05264-1	Rzeszow	Czech Republic
	2019	Artificial NEURAL NETWORK based Smart and ENERGY Efficient STREET Lighting System: A Case Study for RESIDENTIAL area in Hosur	Smart CITY is the term described to integrate all facilities to the people in a frequently accessible manner. STREET lighting system is one of the part of the facility provided in smart CITIES. The unwanted utilisation of the STREET lighting affects the economic status of the country indirectly. Power CONSUMPTION through STREET lighting is major problem, hence ACTION plan is taken to promote the …	STREET lighting; Artificial NEURAL NETWORK; Fuzzy logic controller; Sensors	decision-making; improvements	Yes	Confirmed	Street lighting			Sustainable cities and society	J	Article	0	Construction & Building Technology; Green & Sustainable Science & Technology; Energy & Fuels	Mohandas, P; Dhanaraj, JSA; Gao, XZ	[Mohandas, Prabu] Natl Inst Technol, Dept Comp Sci & Engn, Calicut, Kerala, India; [Dhanaraj, Jerline Sheebha Anni] VIT, Vellore, Tamil Nadu, India; [Gao, Xiao-Zhi] Univ Eastern Finland, Sch Comp, Kuopio, Finland	10.1016/j.scs.2019.101499	Hosur	India
	2019	Mapping URBAN Extent at Large Spatial Scales USING MACHINE LEARNING Methods with VIIRS Nighttime Light and MODIS Daytime NDVI Data	URBANIZATION poses significant challenges on sUSTAINABLE development, disaster resilience, CLIMATE change MITIGATION, and environmental and resource management. Accurate URBAN extent datasets at large spatial scales are essential for researchers and POLICYMAKERS to better understand URBANIZATION dynamics and its socioeconomic DRIVERS and impacts. While high-resolution URBAN extent data products -…	URBANIZATION; URBAN extent; URBAN LAND USE; remote sensing; MACHINE LEARNING; VIIRS; MODIS	URBANIZATION dynamics; mixture analysis; CITIES; areas; classification; population; index; time; map	Yes	Confirmed	Data provision/imputation	Zoning/land use/green space		Remote sensing	J	Article	2	Remote Sensing	Liu, X; de Sherbinin, A; Zhan, YN	[Liu, Xue; de Sherbinin, Alex; Zhan, Yanni] Columbia Univ, CIESIN, Earth Inst, Palisades, NY 10964 USA	10.3390/rs11101247		USA
	2019	Comparison between local CLIMATE zones maps derived from administrative datasets and satellite observations	This paper proposes a method for generating maps of Local CLIMATE Zones (LCZs) within a GIS USING administrative and 2.5D BUILDING databases. The LCZs are computed from MORPHOLOGICAL indicators and BUILDING typology, on vector reference spatial units that correspond to URBAN islets, i.e. blocks of BUILDINGS surrounded by nearby ROADS. The main originality is that, while mean BUILDING height crite…	Local CLIMATE zones; MApUCE; WUDAPT; URBAN databases	BUILDING ENERGY-CONSUMPTION; URBAN CLIMATE	Yes	Confirmed	Data provision/imputation	Multi-city study		Urban climate	J	Article	6	Environmental Sciences; Meteorology & Atmospheric Sciences	Hidalgo, J; Dumas, G; Masson, V; Petit, G; Bechtel, B; Bocher, E; Foley, M; Schoetter, R; Mills, G	[Hidalgo, Julia; Dumas, Guillaume] CNRS, UT2J, LISST UMR 5193, Toulouse, France; [Masson, Valery; Schoetter, Robert] CNRS, CNRM UMR 3589, Meteo France, Toulouse, France; [Petit, Gwendall; Bocher, Erwan] CNRS, Lab STICC UMR 6285, Vannes, France; [Bechtel, Benjamin] Univ Hamburg, Ctr Earth Syst Res & Sustainabil, Hamburg, Germany; [Foley, Michael; Mills, Gerald] UCD, Sch Geog, Dublin, Ireland	10.1016/j.uclim.2018.10.004	Nantes, Paris	France
	2018	Potential of three variant machine-learning models for forecasting DISTRICT level medium-term and long-term ENERGY DEMAND in smart grid environment	Medium-term and long-term ENERGY prediction is essential for the pLANNING and operations of the smart grid eco-system. The prediction of next year and next month ENERGY DEMAND of grid STATION, independent power producers, commercial, domestic and indUSTRIAL consumers are allowed administrators to optimize and plan their resources. To address the forecasting problems, the basic intention of this s…	ANN-NAEM1; MLRM; ADABOOST; ENERGY prediction; MACHINE LEARNING models	SUPPORT VECTOR MACHINE; neural-network; elecTRICITY CONSUMPTION; RESIDENTIAL BUILDINGS; ADABOOST algorithm; data-DRIVEN; management; wind; load; prediction	Yes	Confirmed	CO2 emission/energy consumption prediction			Energy	J	Article	11	Thermodynamics; Energy & Fuels	Ahmad, T; Chen, HX	[Ahmad, Tanveer; Chen, Huanxin] Huazhong Univ Sci & Technol, Sch Energy & Power Engn, Wuhan, Hubei, Peoples R China	10.1016/j.energy.2018.07.084
	2018	Analyzing long-term spatio-temporal patterns of LAND surface temperature in response to rapid URBANIZATION in the mega-CITY of Tehran	Analyzing and monitoring spatial and temporal URBANIZATION is vital for a better understanding of LAND surface temperature (LST) variations. Only a few studies have examined LST variations in mega-CITIES regarding longterm spatial and temporal scales. First, this study compared heat differences between URBAN and sub-URBAN areas (referred to hereafter as the regional scale) in the entire mega-CITY…	LAND surface temperature; CLIMATE; Long-term; LAND COVER; Mega-CITY of Tehran	URBAN heat-isLAND; CLIMATE-change; ENERGY-CONSUMPTION; neural-network; los-angeles; cover; VEGETATION; impact; variability; LANDSCAPE	Yes	Confirmed	Zoning/land use/green space			Land use policy	J	Article	11	Environmental Studies	Tayyebi, A; Shafizadeh-Moghadam, H; Tayyebi, AH	[Tayyebi, Amin] Monsanto Co, Geospatial Data, St Louis, MO 63146 USA; [Shafizadeh-Moghadam, Hossein] Tarbiat Modares Univ, Dept GIS & Remote Sensing, Tehran, Iran; [Tayyebi, Amir H.] Univ Houston, Cullen Coll Engn, Dept Civil & Environm Engn, Houston, TX 77004 USA	10.1016/j.landusepol.2017.11.023	Tehran	Iran
	2017	A spatially-explicit methodological framework based on NEURAL NETWORKS to assess the effect of URBAN FORM on ENERGY DEMAND	URBAN FORM is an important DRIVER of ENERGY DEMAND and therefore of GHG emissions in URBAN areas. Yet, research on URBAN FORM and ENERGY remains sectorial and hasn't been able to deliver a full understanding of the impact of the physical sTRUCTURE of CITIES upon their ENERGY DEMAND. Most common approaches feature engineering models in BUILDINGS, and statistical models in TRANSPORTs. This study ai…	URBAN FORM; ENERGY DEMAND; Model; Artificial NEURAL NETWORKS; GIS	RESIDENTIAL BUILDINGS; BUILT ENVIRONMENTs; TRAVEL behavior; CONSUMPTION; TRANSPORT; HOUSEHOLD; DENSITY; design; CITIES; emissions	Yes	Confirmed	Spatial configurations/travel patterns	Zoning/land use/green space	Urban/neighborhood design	Applied energy	J	Article	12	Energy & Fuels; Engineering, Chemical	Silva, MC; Horta, IM; Leal, V; Oliveira, V	[Silva, Mafalda C.; Horta, Isabel M.; Leal, Vitor; Oliveira, Vitor] Univ Porto, Fac Engn, Oporto, Portugal; [Silva, Mafalda C.] INEGI, Inst Ciencia & Inovacao Engn Mecan & Engn Ind, Oporto, Portugal; [Oliveira, Vitor] Ctr Invest Terr Transportes & Ambiente, Oporto, Portugal	10.1016/j.apenergy.2017.05.113	Porto	Portugal
	2017	TOWER-based GREENHOUSE GAS measurement network design-The National Institute of Standards and Technology North East Corridor Testbed	The North-East Corridor (NEC) Testbed project is the 3rd of three NIST (National Institute of Standards and Technology) GREENHOUSE GAS emissions testbeds designed to adVANce GREENHOUSE GAS measurements capabilities. A design approach for a DENSE observing network combined with atmospheric inversion methodologies is described. The AdVANced Research Weather Research and Forecasting Model with the S…	GREENHOUSE GASES; network design; clUSTERING analysis; Kalman filter; OSSE	co2 emissions; weather research; model; quantification; verification; convection; forecasts	Yes	Confirmed	Data provision/imputation			Advances in atmospheric sciences	J	Article	7	Meteorology & Atmospheric Sciences	Lopez-Coto, I; Ghosh, S; Prasad, K; Whetstone, J	[Lopez-Coto, Israel; Ghosh, Subhomoy; Prasad, Kuldeep; Whetstone, James] NIST, Gaithersburg, MD 20899 USA	10.1007/s00376-017-6094-6	Washington D. C., Baltimore	USA
	2016	On the influence of the URBAN HEAT ISLAND on the cooling load of a school BUILDING in Athens, Greece	The present study investigates the effect of the URBAN HEAT ISLAND (UHI) phenomenon, measured in the Greater Athens Area (GM), on the ENERGY CONSUMPTION of a typical modern school BUILDING. The ENERGY performance of the selected BUILDING has been calculated USING an accurate, extensively validated, transient simulation model for 17 different sites of the GAA, for the summer period. Calculations s…	URBAN HEAT ISLAND; Cooling load; NEURAL NETWORK; Transient simulation model	time-series; NEURAL NETWORKS; simulation; behavior; areas	Yes	Confirmed	Building-level			Journal of atmospheric and solar-terrestrial physics	J	Article	4	Geochemistry & Geophysics; Meteorology & Atmospheric Sciences	Bagiorgas, HS; Mihalakakou, G	[Bagiorgas, H. S.; Mihalakakou, G.] Univ Patras, Sch Engn, Dept Environm & Nat Resources Management, 2 G Seferi St, Agrinion 30100, Greece	10.1016/j.jastp.2016.01.002	Athens	Greece
	2016	FORECASTING BUILDING ENERGY DEMANDS FOR NEW YORK CITY WITH A COUPLED WEATHER BUILDING ENERGY MODEL	Major METROPOLITAN centers experience challenges during management of peak elecTRICAL loads, typically occurring during extreme summer events. These peak loads expose the reliability of the elecTRICAL grid and cUSTOMERS may incur in additional charges for peak load management in regulated DEMAND-response markets. This opens the need for the development of analytical tools that can inform BUILDING…		artificial neural-network; CLIMATE-change; CONSUMPTION; performance; simulation; parameterization; impact; loads	Yes	Confirmed	CO2 emission/energy consumption prediction	Spatial configurations/travel patterns		Proceedings of the asme 10th international conference on energy sustainability, 2016, vol 1	B	Proceedings Paper	0	Green & Sustainable Science & Technology; Energy & Fuels; Engineering, Mechanical	Ortiz, LE; Gonzalez, JE; Gutierrez, E; Arend, M; Legbandt, T; Neufeld, S	[Ortiz, Luis E.; Gonzalez, Jorge E.; Gutierrez, Estatio] City Coll New, Dept Mech Engn, New York, NY 10031 USA; [Arend, Mark; Legbandt, Thomas; Neufeld, Stephen] City Coll New, Dept Elect Engn, New York, NY 10031 USA	10.1115/ES2016-59153	New York City	USA
	2015	URBAN NEIGHBORHOOD characteristics influence on a BUILDING indoor environment	The URBAN HEAT ISLAND (UHI) is exacerbated during heat waves, which have been reported to be more frequent in recent years. Unwanted consequences of the UHI not only include an increase in mean/peak ENERGY DEMAND, but an escalation in the heat-related mortality and disease. Although UHI MITIGATION strategies are being implemented by CITIES, they serve as mid to long-term solutions. The implementa…	URBAN HEAT ISLAND; Indoor environment; Green; Artificial NEURAL NETWORK; Health; LAND-USE/LAND-cover; MITIGATE; URBAN PLANNING	heat-isLAND; thermal condition; LAND-cover; mortality; configuration; prediction; regression; impacts; CITIES; waves	Yes	Confirmed	Zoning/land use/green space			Sustainable cities and society	J	Article	17	Construction & Building Technology; Green & Sustainable Science & Technology; Energy & Fuels	Mirzaei, PA; Olsthoorn, D; Torjan, M; Haghighat, F	[Mirzaei, Parham A.] Univ Nottingham, Architecture & Built Environm Dept, Nottingham NG7 2RD, England; [Olsthoorn, Dave; Torjan, Michael; Haghighat, Fariborz] Concordia Univ, Dept Bldg Civil & Environm Engn, Montreal, PQ H3G 1M8, Canada	10.1016/j.scs.2015.07.008	Montreal	Canada
	2015	Suitable configurations for forested URBAN canyons to MITIGATE the UHI in the CITY of Mendoza, Argentina	URBAN HEAT ISLAND is a phenomenon that affects RESIDENTIAL ENERGY CONSUMPTION, air quality and outdoor comfort, among others. This work focUSES on the semi-arid CITY of Mendoza, Argentina defined by its wide and TREE-lined STREETS. Our research aims to define and quantify which URBAN variables-URBAN FOREST, MORPHOLOGICAL, material and microCLIMATIC-determine day and nighttime air temperatures and…	URBAN HEAT ISLAND; Thermal behavior; MicroCLIMATE measurements; Multivariate analysis; URBAN FOREST configurations		Yes	Confirmed	Zoning/land use/green space			Urban climate	J	Article	7	Environmental Sciences; Meteorology & Atmospheric Sciences	Ruiz, MA; Sosa, MB; Cantaloube, ENC; Canton, MA	[Angelica Ruiz, M.; Belen Sosa, M.; Correa Cantaloube, Erica N.; Alicia Canton, M.] Consejo Nacl Invest Cient & Tecn, CCT Mendoza, Inst Ciencias Humanas Sociales & Ambientales INCI, LAHV, Av Ruiz Leal S-N,Parque Gral San Martin, RA-5500 Mendoza, Argentina	10.1016/j.uclim.2015.05.005	Mendoza	Argentina
	2014	Modeling diurnal LAND temperature cycles over Los Angeles USING downscaled GOES imagery	LAND surface temperature is a key parameter for monitoring URBAN HEAT ISLANDS, assessing heat related risks, and estimating BUILDING ENERGY CONSUMPTION. These environmental issues are characterized by high temporal variability. A possible solution from the remote sensing perspective is to utilize geoSTATIONARY satellites images, for instance, images from GeoSTATIONARY Operational Environmental Sy…	LAND surface temperature; URBAN HEAT ISLAND; Diurnal temperature cycle; Thermal downscaling; Data fUSION; Temporal resolution	URBAN heat-isLAND; surface-ENERGY-baLANCE; thermal imagery; soil-moisture; united-states; time-series; svm; evapotranspiration; parameters; resolution	Yes	Confirmed	Urban/neighborhood design			Isprs journal of photogrammetry and remote sensing	J	Article	34	Geography, Physical; Geosciences, Multidisciplinary; Remote Sensing; Imaging Science & Photographic Technology	Weng, QH; Fu, P	[Weng, Qihao; Fu, Peng] Indiana State Univ, Ctr Urban & Environm Change, Dept Earth & Environm Syst, Terre Haute, IN 47809 USA	10.1016/j.isprsjprs.2014.08.009	Los Angeles	USA
	2013	Simulating URBAN FORM and ENERGY CONSUMPTION in the Pearl River Delta Under Different Development Strategies	China is currently the world's largest ENERGY consumer. The rapid growth in ENERGY CONSUMPTION has resulted in many problems in this country. The Chinese government has realized the necessity of improving ENERGY EFFICIENCY and REDUCING ENERGY CONSUMPTION. As a USEFUL decision-support tool, simulation models can be USED to examine the potential impacts of different pLANS on URBAN development and E…	cellular automata; ENERGY CONSUMPTION; SUPPORT VECTOR REGRESSION; URBAN FORMS	SUPPORT VECTOR REGRESSION; cellular-automata; accuracy assessment; BUILT ENVIRONMENT; TRAVEL behavior; china; complexity; models; optimization; expansion	Yes	Confirmed	Spatial configurations/travel patterns	CO2 emission/energy consumption prediction		Annals of the association of american geographers	J	Article	16	Geography	Chen, YM; Li, X; Wang, SJ; Liu, XP; Ai, B	[Chen, Yimin; Li, Xia; Wang, Shujie; Liu, Xiaoping] Sun Yat Sen Univ, Sch Geog & Planning, Guangzhou 510275, Guangdong, Peoples R China; [Chen, Yimin; Li, Xia; Wang, Shujie; Liu, Xiaoping; Ai, Bin] Sun Yat Sen Univ, Guangdong Key Lab Urbanizat & Geosimulat, Guangzhou 510275, Guangdong, Peoples R China; [Ai, Bin] Sun Yat Sen Univ, Sch Marine Sci, Guangzhou 510275, Guangdong, Peoples R China	10.1080/00045608.2012.740360	Pearl River Delta	China
	2010	A validated methodology for the prediction of heating and cooling ENERGY DEMAND for BUILDINGS within the URBAN HEAT ISLAND Case-study of London	This paper describes a method for predicting air temperatures within the URBAN HEAT ISLAND at discreet locations based on input data from one meteorological STATION for the time the prediction is required and historic measured air temperatures within the CITY It USES London as a case-study to describe the method and its applications The prediction model is based on Artificial NEURAL NETWORK (ANN)…	URBAN; Heat; IsLAND; Prediction; Heating; Cooling; BUILDINGS; ANN	air-temperature; simulation; intensity; CLIMATES; athens; model; area	Yes	Confirmed	Building-level			Solar energy	J	Article	50	Energy & Fuels	Kolokotroni, M; Davies, M; Croxford, B; Bhuiyan, S; Mavrogianni, A	[Kolokotroni, Maria; Bhuiyan, Saiful] Brunel Univ, Mech Engn Sch Engn & Design, Uxbridge UB8 3PH, Middx, England; [Davies, Michael; Croxford, Ben; Mavrogianni, Anna] UCL, Bartlett Sch Grad Studies, London, England	10.1016/j.solener.2010.08.002	London	United Kingdom
	2010	DeforeSTATION DRIVEN by URBAN population growth and agricultural trade in the twenty-first century	REDUCING atmospheric CARbon emissions from tropical deforeSTATION is at present considered a cost-effective option for MITIGATING CLIMATE change. However, the forces associated with tropical forest loss are uncertain(1). Here we USE satellite-based estimates of forest loss for 2000 to 2005 (ref. 2) to assess economic, agricultural and demographic correlates across 41 counTRIES in the humid tropic…			Yes	Confirmed	Spatial configurations/travel patterns			Nature geoscience	J	Article	565	Geosciences, Multidisciplinary	DeFries, RS; Rudel, T; Uriarte, M; Hansen, M	[DeFries, Ruth S.; Uriarte, Maria] Columbia Univ, Dept Ecol Evolut & Environm Biol, New York, NY 10027 USA; [Rudel, Thomas] Rutgers State Univ, Dept Human Ecol, Piscataway, NJ 08854 USA; [Rudel, Thomas] Rutgers State Univ, Dept Sociol, Piscataway, NJ 08854 USA; [Hansen, Matthew] S Dakota State Univ, Geog Informat Sci Ctr Excellence, Brookings, SD 57007 USA	10.1038/NGEO756
	2009	Heating and cooling degree day prediction within the London URBAN HEAT ISLAND area	This paper describes the London Site Specific Air Temperature prediction model, which comprises of a suite of artificial NEURAL NETWORK (ANN) models to predict site-specific hourly air temperature within the Greater London Area (GLA). The model was developed USING a back-propagation ANN model based on hourly air temperature measurements at 77 fixed temperature STATIONS (FTS) and hourly meteorolog…		air-temperature; simulation; intensity; ventilation; dynamics; CLIMATE; athens; DEMAND; canyon; impact	Yes	Confirmed	District heating and cooling			Building services engineering research & technology	J	Article	22	Construction & Building Technology	Kolokotroni, M; Zhang, Y; Giridharan, R	[Kolokotroni, M.; Zhang, Y.; Giridharan, R.] Brunel Univ, Sch Engn & Design, Uxbridge UB8 3PH, Middx, England	10.1177/0143624409104733	London	United Kingdom
	2007	The London Heat IsLAND and BUILDING cooling design	London's URBAN HEAT ISLAND increases the mean air temperature which affects the DEMAND for heating and cooling BUILDINGS. Measured air temperature data have been USED as input to a BUILDING ENERGY simulation computer program to assess the heating and cooling load of a typical air-conditioned office BUILDING positioned at 24 different locations within the London Heat IsLAND. It is found that the U…	Heat IsLAND; London; ENERGY DEMAND; BUILDING design	URBAN CLIMATE; ENERGY; model; simulation; dynamics; albedo; athens	Yes	Confirmed	Building-level			Solar energy	J	Article	96	Energy & Fuels	Kolokotroni, M; Zhang, YP; Watkins, R	Brunel Univ, Sch Engn & Design, Uxbridge UB8 3PH, Middx, England	10.1016/j.solener.2006.06.005	London	United Kingdom
	2019	Data-DRIVEN approach to prediction of RESIDENTIAL ENERGY CONSUMPTION at URBAN scales in London	Development of ENERGY prediction models plays an integral part in management and enhancement of the ENERGY EFFICIENCY of BUILDINGS, including CARbon emission REDUCTION. Simplified and data-DRIVEN models are often the preferred option when detailed information of simulation is not available and the fast responses are required. This study developed data-DRIVEN models for predicting elecTRICITY and …	URBAN PLANNING; Green infrasTRUCTURE; Prediction model; BUILDING ENERGY at URBAN scales; Multilayer NEURAL NETWORK; London	uk HOUSING stock; elecTRICITY CONSUMPTION; regression-analysis; commercial BUILDINGS; socio-demographics; RANDOM FORESTS; models; machine; DEMAND; behaviors	Yes	Confirmed	CO2 emission/energy consumption prediction			Energy	J	Article	1	Thermodynamics; Energy & Fuels	Gassar, AAA; Yun, GY; Kim, S	[Gassar, Abdo Abdullah Ahmed; Yun, Geun Young] Kyung Hee Univ, Dept Architectural Engn, 1732 Deogyeong Daero, Yongin 17104, Gyeonggi Do, South Korea; [Kim, Sumin] Yonsei Univ, Dept Architecture & Architectural Engn, Seoul 03722, South Korea	10.1016/j.energy.2019.115973	London	United Kingdom
	2019	Comparison between convolutional NEURAL NETWORKS and RANDOM FOREST for local CLIMATE zone classification in mega URBAN areas USING LANDSAT images	The Local CLIMATE Zone (LCZ) scheme is a classification system providing a standardization framework to present the characteristics of URBAN FORMS and functions, especially for URBAN HEAT ISLAND (UHI) research. LANDSAT-based 100 m resolution LCZ maps have been classified by the World URBAN Database and Portal Tool (WUDAPT) method USING a RANDOM FOREST (RF) MACHINE LEARNING classifier. Some studie…	Local CLIMATE zone; Convolutional NEURAL NETWORKS; RANDOM FOREST; URBAN CLIMATE; LANDSAT	SUPPORT VECTOR MACHINE; heat-isLAND intensity; cover classification; semantic segmentation; surface temperature; ENERGY-CONSUMPTION; imbaLANCED data; MITIGATION; wudapt; CITIES	Yes	Confirmed	Data provision/imputation	Zoning/land use/green space		Isprs journal of photogrammetry and remote sensing	J	Article	3	Geography, Physical; Geosciences, Multidisciplinary; Remote Sensing; Imaging Science & Photographic Technology	Yoo, C; Han, D; Im, J; Bechtel, B	[Yoo, Cheolhee; Han, Daehyeon; Im, Jungho] UNIST, Sch Urban & Environm Engn, Ulsan 44919, South Korea; [Bechtel, Benjamin] Ruhr Univ Bochum, Dept Geog, D-44801 Bochum, Germany	10.1016/j.isprsjprs.2019.09.009	Rome, Madrid, Chicago	Italy, Spain, USA
	2019	Development of artificial NEURAL NETWORK models for predicting thermal comfort evaluation in URBAN PARKS in summer and winter	This study has successfully formulated artificial NEURAL NETWORK models to predict thermal comfort evaluation in outdoor URBAN PARKS in Hong Kong, a sub-tropical CITY, for both summer and winter periods. The artificial NEURAL NETWORK models embracing two-hidden layers outperformed other types of commonly adopted thermal comfort models. The model prediction performance was considerably improved by…	Outdoor thermal comfort; URBAN park design; Artificial NEURAL NETWORKS	physiological equivalent temperature; BUILDING ENERGY-CONSUMPTION; sensitivity-analysis; outdoor spaces; CLIMATE-change; sensation; indoor; adaptation; isLAND; environments	Yes	Confirmed	Zoning/land use/green space			Building and environment	J	Article	0	Construction & Building Technology; Engineering, Environmental; Engineering, Civil	Chan, SY; Chau, CK	[Chan, Sin Yi; Chau, Chi Kwan] Hong Kong Polytech Univ, Dept Bldg Serv Engn, Hung Hom, Kowloon, Hong Kong, Peoples R China	10.1016/j.buildenv.2019.106364	Hong Kong	Hong Kong
	2019	ClUSTERED spatially and temporally resolved global heat and cooling ENERGY DEMAND in the RESIDENTIAL sector	CLIMATIC conditions, population DENSITY, geography, and SETTLEMENT sTRUCTURE all have a strong influence on the heating and cooling DEMAND of a country, and thus on resulting ENERGY USE and GREENHOUSE GAS emissions. In particular, the choice of heating or cooling system is influenced by available ENERGY disTRIBUTION infrasTRUCTURE, where the cost of such infrasTRUCTURE is strongly related to the …	Heat DEMAND; Cooling DEMAND; Spatially resolved; Temporally resolved; ENERGY systems; Integrated assessment	integrated assessment; elecTRICITY DEMAND; CLIMATE-change; BUILDING stock; systems; model; CONSUMPTION; MITIGATION; pathways; number	Yes	Confirmed	CO2 emission/energy consumption prediction			Applied energy	J	Article	1	Energy & Fuels; Engineering, Chemical	Sachs, J; Moya, D; Giarola, S; Hawkes, A	[Sachs, Julia; Moya, Diego; Hawkes, Adam] Imperial Coll London, Dept Chem Engn, London SW7 2AZ, England; [Giarola, Sara] Imperial Coll London, Dept Earth Sci & Engn, London SW7 2AZ, England; [Moya, Diego] Univ Tecn Ambato, Fac Ingn Civil & Mecan, Carrera Ingn Mecan, Av Los Chasquis & Rio Payamino, Ambato 1801314, Ecuador; [Moya, Diego] Inst Appl Sustainabil Res, Av Granados E13-55 & Isla Marchena…	10.1016/j.apenergy.2019.05.011	Turin	Italy
	2019	Influence of CLIMATE on the creation of multilayer PERCEPTRONs to analyse the risk of FUEL poverty	Many studies are focUSED on the diagnosis of FUEL poverty. However, its prediction before occupying HOUSEHOLDS is a developing research area. This research studies the feasibility of implementing the FUEL Poverty Potential Risk Index (FPPRI) in different CLIMATE zones of Chile by means of regression models based on artificial NEURAL NETWORKS (ANNs). A total of 116,640 representative case studies …	FUEL poverty; FUEL Poverty Potential Risk Index (FPPRI); CLIMATE zone; Multilayer PERCEPTRONs; Social HOUSING; POLICYMAKING	artificial neural-networks; excess winter deaths; ENERGY poverty; RESIDENTIAL BUILDINGS; linear-regression; POLICY; CONSUMPTION; models; index; context	Yes	Confirmed	Consumer behavior(buildings)	Multi-city study		Energy and buildings	J	Article	2	Construction & Building Technology; Energy & Fuels; Engineering, Civil	Bienvenido-Huertas, D; Perez-Fargallo, A; Alvarado-Amador, R; Rubio-Bellido, C	[Bienvenido-Huertas, David] Univ Seville, Dept Graph Express & Bldg Engn, Seville, Spain; [Perez-Fargallo, Alexis; Alvarado-Amador, Raul] Univ Bio Bio, Dept Bldg Sci, Concepcion, Chile; [Rubio-Bellido, Carlos] Univ Seville, Dept Bldg Construct 2, Seville, Spain	10.1016/j.enbuild.2019.05.063	Santiago, Concepcion, Valparaiso	Chile
	2019	Quantifying how LANDSCAPE composition and configuration affect URBAN LAND surface temperatures USING MACHINE LEARNING and neutral LANDSCAPES	The URBAN HEAT ISLAND effect is an important 21st century issue becaUSE it intersects with the complex challenges of URBAN population growth, global CLIMATE change, public health and increasing ENERGY DEMAND for cooling. While the effects of URBAN LANDSCAPE composition on LAND surface temperature (LST) are well-studied, less attention has been paid to the spatial arrangement of LAND COVER types e…	URBAN HEAT ISLANDS; LAND surface temperature; Neutral LANDSCAPES; LAND-sharing and LAND-sparing; Ecosystem services	heat-isLAND; cover data; CITY; impact; waves; area; variability; simulation; SETTLEMENT; regression	Yes	Confirmed	Zoning/land use/green space			Computers environment and urban systems	J	Article	1	Computer Science, Interdisciplinary Applications; Engineering, Environmental; Environmental Studies; Geography; Operations Research & Management Science; Regional & Urban Planning	Osborne, PE; Alvares-Sanches, T	[Osborne, Patrick E.] Univ Southampton, Fac Environm & Life Sci, Ctr Environm Sci, Southampton S017 1BJ, Hants, England; [Alvares-Sanches, Tatiana] Univ Southampton, Fac Engn & Phys Sci, Sustainable Energy Res Grp, Energy & Climate Change Div, Southampton S017 1BJ, Hants, England	10.1016/j.compenvurbsys.2019.04.003	Southampton	United Kingdom
	2019	Scenario simulation of URBAN ENERGY-related CO2 emissions by coupling the socioeconomic factors and spatial sTRUCTURES	As CITIES constitute the main sources of CO2 emissions, accurate simulation and prediction of URBAN CO2 emissions are becoming increasingly necessary for understanding environmental impacts and supporting the POLICY making TOWARD a LOW-CARBON development. However, most previous studies on estimating CO2 emissions have only considered the effects of socioeconomic driving factors while disregarding…	CO2 emissions; Socioeconomic development; URBAN spatial sTRUCTURE; Cellular automata; Scenario simulation	CARbon-dioxide emissions; panel-data analysis; LAND-USE; system dynamics; cellular-automaton; china; form; optimization; CONSUMPTION; environment	Yes	Confirmed	CO2 emission/energy consumption prediction	Spatial configurations/travel patterns		Applied energy	J	Article	4	Energy & Fuels; Engineering, Chemical	Liu, XP; Ou, JP; Chen, YM; Wang, SJ; Li, X; Jiao, LM; Liu, YL	[Liu, Xiaoping; Ou, Jinpei; Wang, Shaojian] Sun Yat Sen Univ, Sch Geog & Planning, Guangdong Key Lab Urbanizat & Geosimulat, 135 West Xingang Rd, Guangzhou 510275, Guangdong, Peoples R China; [Chen, Yimin; Li, Xia] East China Normal Univ, Sch Geog Sci, Key Lab Geog Informat Sci, Minist Educ, 500 Dongchuan Rd, Shanghai 200241, Peoples R China; [Jiao, Limin; Liu, Yaolin] Wuhan Univ, Sch Resource & …	10.1016/j.apenergy.2019.01.173	Guangzhou	China
	2019	Identifying URBAN geomeTRIC types as ENERGY performance patterns	This paper aims to find the impact of geomeTRIC parameters on the ENERGY performance of BUILDINGS, to USING them to identify types regarding major geomeTRIC characteristics of a target area. Conventional approaches to control ENERGY EFFICIENCY of BUILDINGS mainly focus on materials and capaCITY of insulation, but rarely consider URBAN and BUILDING geomeTRIES. By examining ENERGY impacts on URBAN …	URBAN block; URBAN FORM; URBAN geometry; ENERGY; ClUSTER analysis; Typology	optimum insulation thickness; outdoor thermal comfort; vertical surfaces; solar access; daylight; canyon; impact; ORIENTATION; MORPHOLOGY; radiation	Yes	Confirmed	Spatial configurations/travel patterns	building-level		Energy for sustainable development	J	Article	4	Green & Sustainable Science & Technology; Energy & Fuels	Oh, M; Kim, Y	[Oh, Minseok; Kim, Youngchul] Korea Adv Inst Sci & Technol, Dept Civil & Environm Engn, 291 Daehak Ro, Daejeon 34141, South Korea	10.1016/j.esd.2018.12.002
	2019	LANDSAT 8 thermal data to support URBAN management and pLANNING in the CLIMATE change era: a case study in Torino area (NW Italy)	LAND surface temperature (LST) is an important factor in global CLIMATE change, VEGETATION growth, and URBAN HEAT ISLAND (UHI). LST is one of the most important environmental variables measured by satellite remote sensing. Public domain data are available from the operational LANDSAT-8 Thermal Infrared Sensor (TIRS). The present study focUSES on determining and mapping UHI for the METROPOLITAN CI…	LANDSAT 8 TIRS; LST; NDVI; UHI; mapping; MITIGATION; CLIMATE change; URBAN FORESTRY	surface temperature reTRIEVAL; heat-isLAND; CITY; URBANIZATION; emissivity; impact; roofs; south	Yes	Confirmed	Zoning/land use/green space			Remote sensing technologies and applications in urban environments iv	S	Proceedings Paper	0	Environmental Sciences; Remote Sensing; Optics	Orusa, T; Mondino, EB	[Orusa, T.] Univ Turin, Green Off Climate Energy & Change Grp, Turin, Italy; [Mondino, E. Borgogno] Torino Univ, Dept Agr Forest & Food Sci, DISAFA, Lgo P Braccini 2, Grugliasco, TO, Italy	10.1117/12.2533110	Turin	Italy
	2019	Mapping Long-Term Dynamics of Population and DWELLINGS Based on a Multi-Temporal Analysis of URBAN MORPHOLOGIES	Information on the disTRIBUTION and dynamics of DWELLINGS and their inhabitants is essential to support decision-making in various fields such as ENERGY provision, LAND USE pLANNING, risk assessment and disaster management. However, as various different of approaches to estimate the current disTRIBUTION of population and DWELLINGS exists, further evidence on past dynamics is needed for a better u…	URBAN MORPHOLOGY; topographic maps; multi-temporal; population; DWELLING units; estimation; dynamics; URBAN PLANNING; dasymeTRIC mapping; historical demography	BUILDING population; high-resolution; topographic maps; information; interpolation; patterns; systems; models; cover; stock	Yes	Confirmed	Data provision/imputation			Isprs international journal of geo-information	J	Article	3	Geography, Physical; Remote Sensing	Hecht, R; Herold, H; Behnisch, M; Jehling, M	[Hecht, Robert; Herold, Hendrik; Behnisch, Martin; Jehling, Mathias] Leibniz Inst Ecol Urban & Reg Dev, Weberpl 1, D-01217 Dresden, Germany	10.3390/ijgi8010002	Landau	Germany
	2018	Data-DRIVEN URBAN ENERGY Simulation (DUE-S): A framework for integrating engineering simulation and MACHINE LEARNING methods in a multi-scale URBAN ENERGY modeling workflow	The world is rapidly URBANizing, and the ENERGY intensive BUILT ENVIRONMENT is becoming increasingly responsible for the world's ENERGY CONSUMPTION and associated environmental emissions. As a result, significant efforts have been put forth to develop methods that can accurately model and characterize BUILDING ENERGY CONSUMPTION in CITIES. These models aim to utilize physics-based BUILDING ENERGY…	BUILDING ENERGY; Data-DRIVEN; MACHINE LEARNING; Multi-scale; Simulation; URBAN ENERGY modeling; URBAN context	RESIDENTIAL BUILDINGS; regression-analysis; CONSUMPTION; performance; impact; calibration; network; NEIGHBORHOODS; prediction; TREE	Yes	Confirmed	Building-level	Urban/neighborhood design		Applied energy	J	Article; Proceedings Paper	9	Energy & Fuels; Engineering, Chemical	Nutkiewicz, A; Yang, Z; Jain, RK	[Nutkiewicz, Alex; Yang, Zheng; Jain, Rishee K.] Stanford Univ, Dept Civil & Environm Engn, Urban Informat Lab, 473 Via Ortega, Stanford, CA 94305 USA	10.1016/j.apenergy.2018.05.023
	2018	Estimating RESIDENTIAL ENERGY CONSUMPTION in METROPOLITAN areas: A microsimulation approach	Prior research has shown that LAND USE patterns and the SPATIAL CONFIGURATIONS of CITIES have a significant impact on RESIDENTIAL ENERGY DEMAND. Given the pressing issues surrounding ENERGY security and CLIMATE change, there is renewed interest in developing and retrofitting CITIES to make them more ENERGY efficient. Yet deriving micro-scale RESIDENTIAL ENERGY FOOTprints of METROPOLITAN areas is …	RESIDENTIAL ENERGY CONSUMPTION; Data synthesis; Statistical matching; MACHINE LEARNING	URBAN FORM; regression; sector; URBANIZATION; appliance; space; stock	Yes	Confirmed	CO2 emission/energy consumption prediction			Energy	J	Article	4	Thermodynamics; Energy & Fuels	Zhang, WW; Robinson, C; Guhathakurta, S; Garikapati, VM; Dilkina, B; Brown, MA; Pendyala, RM	[Zhang, Wenwen] Virginia Polytech Inst & State Univ, Dept Urban Affairs & Planning, Blacksburg, VA 24061 USA; [Robinson, Caleb] Georgia Inst Technol, Sch Computat Sci & Engn, Atlanta, GA 30332 USA; [Guhathakurta, Subhrajit] Georgia Inst Technol, Sch City & Reg Planning, Atlanta, GA 30332 USA; [Garikapati, Venu M.] Natl Renewable Energy Lab, Golden, CO USA; [Dilkina, Bistra] Univ Southern Calif, D…	10.1016/j.energy.2018.04.161	Phoenix	USA
	2018	A geoprocessing framework to compute URBAN indicators: The MApUCE tools chain	A growing DEMAND from URBAN PLANNING services and various research thematics concerns URBAN FABRIC characterization. Several projects (such as WUDAPT) are currently lead in the URBAN CLIMATE field to answer this DEMAND. However there is currently a need to propose standardized methods to calculate URBAN indicators and to automatically classify the URBAN FABRIC for any CITY in the world as well as…	MORPHOLOGICAL indicators; Local CLIMATE zone; GIS; URBAN HEAT ISLAND; Open source	ENERGY-CONSUMPTION; heat-isLAND; CLIMATE; BUILDINGS; mortality; meTRICS; form	Yes	Confirmed	Spatial configurations/travel patterns			Urban climate	J	Article	8	Environmental Sciences; Meteorology & Atmospheric Sciences	Bocher, E; Petit, G; Bernard, J; Palominos, S	[Bocher, Erwan; Bernard, Jeremy; Palominos, Sylvain] CNRS, UMR 6285, Lab STICC Lab, Vannes, France; [Petit, Gwendall] Univ Bretagne Sud, UMR 6285, Lab STICC Lab, Vannes, France	10.1016/j.uclim.2018.01.008
	2018	Mapping BUILDING CARbon emissions within local CLIMATE zones in Shanghai	The CARbon emission pattern of the BUILT ENVIRONMENT is closely associated with its MORPHOLOGICAL and functional sTRUCTURES. Based on the online volunteered geographic information and some publicly available official data sources, this study intends to provide a standardized framework for estimating the indirect BUILDING CARbon emissions within the boundaries of various types of Local CLIMATE Zon…	BUILDING CARbon Emission; Local CLIMATE Zone; RANDOM FOREST; Shanghai		Yes	Confirmed	CO2 emission/energy consumption prediction	Spatial configurations/travel patterns		Cleaner energy for cleaner cities	S	Proceedings Paper	0	Energy & Fuels; Environmental Sciences	Wu, YH; Sharifi, A; Yang, P; Borjigin, H; Murakami, D; Yamagata, Y	[Wu, Yihan; Yang, Perry] Tongji Univ, Coll Architecture & Urban Planning, Sino US Eco Urban Lab, Shanghai, Peoples R China; [Wu, Yihan; Yang, Perry] Georgia Inst Technol, Eco Urban Lab, Sch City & Reg Planning, Atlanta, GA 30332 USA; [Wu, Yihan; Yang, Perry] Georgia Inst Technol, Sch Architecture, Atlanta, GA 30332 USA; [Wu, Yihan; Sharifi, Ayyoob] Natl Inst Environm Studies, Global Carbon Projec…	10.1016/j.egypro.2018.09.195	Shanghai	China
	2018	Technomass and cooling DEMAND in South America: a superlinear relationship?	The impact of the increasing technomass (TM) on cooling DEMAND in BUILDINGS is explored for CITIES in South America. The entangled double nature of the BUILDING-environment interrelation in an URBAN context is analyzed. The research question is whether an increase in the BUILDING DENSITY produces a superlinear increase of ENERGY CONSUMPTION at the URBAN scale. AdVANced spatially explicit quantita…	BUILDING performance simulation; cooling loads; DENSITY; ENERGY DEMAND; microCLIMATES; technomass: URBAN CLIMATE; URBAN DESIGN; URBAN FABRIC; URBAN FORM; URBAN HEAT ISLAND	URBAN heat-isLAND; ENERGY-CONSUMPTION; CLIMATE-change; performance; metabolism; BUILDINGS; DENSITY; design; impact; CITIES	Yes	Confirmed	Spatial configurations/travel patterns	Multi-city study		Building research and information	J	Article	5	Construction & Building Technology	Palme, M; Inostroza, L; Salvati, A	[Palme, Massimo; Salvati, Agnese] Univ Catololica Norte, Escuela Arquitectura, Antofagasta, Chile; [Inostroza, Luis] Rhur Univ Bochum, Inst Geog, Bochum, Germany; [Inostroza, Luis] Univ Autonoma Chile, Temuco, Chile; [Salvati, Agnese] Brunel Univ London, Dept Mech Aerosp & Civil Engn, Uxbridge, Middx, England	10.1080/09613218.2018.1483868
	2017	URBAN weather data and BUILDING models for the inclUSION of the URBAN HEAT ISLAND effect in BUILDING performance simulation	This data article presents files supporting calculation for URBAN HEAT ISLAND (UHI) inclUSION in BUILDING performance simulation (BPS). Methodology is USED in the research article "From URBAN CLIMATE to ENERGY CONSUMPTION. Enhancing BUILDING performance simulation by including the URBAN HEAT ISLAND effect" (Palme et al., 2017) [1]. In this research, a Geographical Information System (GIS) study i…	BUILDING performance simulation; URBAN HEAT ISLAND; Geographical Information Systems; URBAN Weather Generator; PRINCIPAL COMPONENT ANALYSIS		Yes	Confirmed	Spatial configurations/travel patterns	Multi-city study		Data in brief	J	Article; Data Paper	1	Multidisciplinary Sciences	Palme, M; Inostroza, L; Villacreses, G; Lobato, A; Carrasco, C	[Palme, M.] Univ Catolica Norte, Antofagasta, Chile; [Palme, M.; Villacreses, G.; Lobato, A.] Inst Nacl Eficiencia Energet & Energias Renovable, Quito, Ecuador; [Inostroza, L.] Ruhr Univ Bochum, Inst Geog, Bochum, Germany; [Inostroza, L.] Univ Autonoma Chile, Temuco, Chile; [Carrasco, C.] Univ Valparaiso, Valparaiso, Chile	10.1016/j.dib.2017.08.035	Guayaquil, Lima, Antofagasta, Valparaiso	Chile
	2017	Classification and grouping of Brazilian CITIES in heating and cooling degrees-day: 1960 to 2013	Degree-days is commonly USED worldwide to estimate BUILDINGS ENERGY CONSUMPTION due to heating and /or cooling. However, in Brazil, there is no a technical standard calculation method and / or a degree-days ZONING. The database is composed by the CLIMATOLOGICAL Norms and monthly averages of the Meteorological Database for Teaching and Research of INMET. These data allow to evaluate the evolution …	CLIMATIC ZONING; ENERGY EFFICIENCY; Degrees-day; Adaptive indices		Yes	Confirmed	Data provision/imputation	Multi-city study		Urbe-revista brasileira de gestao urbana	J	Article	1	Urban Studies	Stensjo, IP; Ferreira, CC; Loura, RM	[Stensjo, Iraci Pereira; Ferreira, Camila Carvalho; Loura, Rejane Magiag] Univ Fed Minas Gerais, Belo Horizonte, MG, Brazil	10.1590/2175-3369.009.SUPL1.A003		Brazil
	2017	BUILDING classification from Lidar data for spatio-temporal assessment of 3D URBAN developments	Three dimensional calculations of elements of URBAN FORM such as BUILDINGS and VEGETATION volumes are necessary for assessment of trends in spatio-temporal sUSTAINABLE 3D URBAN FORM becaUSE the volume of VEGETATION and BUILDINGS affect the level of ENERGY CONSUMPTION and REDUCTION of air pollution. For such studies, the first step is to acquire 3D point clouds of URBAN FORM such as by airborne li…	Airborne Lidar; MACHINE LEARNING; 3D URBAN FORM; GLCM; sUSTAINABILITY	images; statistics	Yes	Confirmed	Data provision/imputation	Spatial configurations/travel patterns		International high-performance built environment conference - a sustainable built environment conference 2016 series (sbe16), ihbe 2016	S	Proceedings Paper	12	Construction & Building Technology; Green & Sustainable Science & Technology; Engineering, Environmental; Engineering, Civil	Shirowzhan, S; Trinder, J	[Shirowzhan, Sara; Trinder, John] Univ New South Wales, Sch Civil & Environm Engn, Sydney, NSW 2052, Australia	10.1016/j.proeng.2017.04.308	New South Wales	Australia
	2016	Discrimination of SETTLEMENT and IndUSTRIAL Area USING LANDSCAPE MeTRICS in Rural Region	Detailed and precise information of LAND-USE and LAND-cover (LULC) in rural area is essential for LAND-USE pLANNING, environment and ENERGY management. The confUSION in mapping RESIDENTIAL and indUSTRIAL areas brings problems in ENERGY management, environmental management and sUSTAINABLE LAND USE development. However, they remain ambiguous in the former rural LULC mapping, and this insufficient s…	LAND-USE and LAND-cover (LULC); object-based image analysis (OBIA); LANDSCAPE meTRICS; SUPPORT VECTOR MACHINE (SVM); very high resolution (VHR); rural SETTLEMENT	object-based classification; high-resolution imagery; remote-sensing data; LAND-cover classification; effective mesh size; oriented classification; sensed images; fragmentation; multiresolution; segmentation	Yes	Confirmed	Data provision/imputation	Zoning/land use/green space		Remote sensing	J	Article	3	Remote Sensing	Zheng, XY; Wang, Y; Gan, MY; Zhang, J; Teng, LM; Wang, K; Shen, ZQ; Zhang, L	[Zheng, Xinyu; Wang, Yang; Gan, Muye; Zhang, Jing; Wang, Ke; Shen, Zhangquan; Zhang, Ling] Zhejiang Univ, Inst Agr Remote Sensing & Informat Technol, Coll Environm & Resource Sci, Hangzhou 310058, Zhejiang, Peoples R China; [Teng, Longmei] Inst Zhejiang Land Surveying & Planning, Hangzhou 310007, Zhejiang, Peoples R China	10.3390/rs8100845	Chongfu Town, Shimeng Town	China
	2016	ElecTRICITY Load Forecasting for URBAN Area USING Weather Forecast Information	The global DEMAND for ENERGY is increasing daily with the expansion of ENERGY infrasTRUCTURE and the addition of new appliances. Efficient ENERGY Management System (EMS) is the need of the day. All RESIDENTIAL and commercial BUILDINGS can achieve better ENERGY EFFICIENCY and CONSUMPTION with the USE of EMS. Load forecasting is one of the methods to enable EMS to work efficiently. The accuracy of …	load prediction; elecTRICAL load forecasting; URBAN area elecTRICAL load; ann; REGRESSION TREES; meteorological data		Yes	Confirmed	CO2 emission/energy consumption prediction			2016 ieee international conference on power and renewable energy (icpre)	B	Proceedings Paper	7	Green & Sustainable Science & Technology; Energy & Fuels; Engineering, Electrical & Electronic	Dehalwar, V; Kalam, A; Kolhe, ML; Zayegh, A	[Dehalwar, Vasudev; Kalam, Akhtar; Zayegh, Aladin] Victoria Univ, Coll Engn & Sci, POB 14428, Melbourne, Vic 8001, Australia; [Kolhe, Mohan Lal] Univ Agder, Fac Sci & Engn, POB 422, NO-4604 Kristiansand, Norway	10.1109/ICPRE.2016.7871231
	2014	A proposal for a site location pLANNING model of environmentally friendly URBAN ENERGY supply pLANTS USING an environment and ENERGY geographical information system (E-GIS) database (DB) and an artificial NEURAL NETWORK (ANN)	This study proposes a site location potential model for URBAN ENERGY supply pLANTS and renewable ENERGY availability USING an environment and ENERGY geographical information system (E-GIS) database (DB) and an artificial NEURAL NETWORK (ANN). This model addresses the technical methodology of examining the potential for the suitability of URBAN ENERGY supply pLANTS and renewable ENERGY latency in …	Low CARbon green CITY; URBAN PLANNING support system (PSS); ENERGY supply pLANNING; Environment and ENERGY geographic information system (E-GIS); Artificial NEURAL NETWORK (ANN); ENERGY potential map	solar-radiation; wind ENERGY; resource assessment; elecTRIC-load; CONSUMPTION; prediction; turkey; optimization; methodology; generation	Yes	Confirmed	Utility infrastructure planning	Spatial configurations/travel patterns		Applied energy	J	Article	38	Energy & Fuels; Engineering, Chemical	Yeo, IA; Yee, JJ	[Yeo, In-Ae; Yee, Jurng-Jae] Dong A Univ, Dept Architectural Engn, Pusan 604714, South Korea	10.1016/j.apenergy.2013.12.060
	2019	A Novel Heuristic Artificial NEURAL NETWORK Model for URBAN COMPUTING	URBAN COMPUTING brings powerful computational techniques to bear on such URBAN challenges as pollution, ENERGY CONSUMPTION, and TRAFFIC congestion. After decades of rapid development, artificial NEURAL NETWORKS (ANN) have been successfully applied in many disciplines and have enabled many remarkable research achievements. However, no quantitative method has yet been found that can identify every …	URBAN COMPUTING; artificial NEURAL NETWORK model; sTRUCTURE and parameter; ant colony optimization; speed and accuracy		Yes	Confirmed	Modeling method contribution			Ieee access	J	Article	0	Computer Science, Information Systems; Engineering, Electrical & Electronic; Telecommunications	Na, Q; Yin, GS; Liu, A	[Na, Qi] Harbin Engn Univ, Ctr Big Data & Business Intelligence, Harbin 150001, Peoples R China; [Na, Qi; Yin, Guisheng] Harbin Engn Univ, Coll Comp Sci & Technol, Harbin 150001, Peoples R China; [Na, Qi] Harbin Engn Univ, Sch Econ & Management, Harbin 150001, Peoples R China; [Liu, Ang] Heilongjiang Univ Sci & Technol, Sch Management, Harbin 150001, Peoples R China	10.1109/ACCESS.2019.2960687	Gyunggi-do	South Korea
	2021	Predicting energy cost of public buildings by artificial neural networks, CART, and random forest	The paper deals with modeling the cost of energy consumed in public buildings by leveraging three machine learning methods: artificial neural networks, CART, and random forest regression trees. Energy consumption is one of the major issues in global and national policies, therefore scientific efforts in creating prediction models of energy consumption and cost are highly important. One of the lar…	Energy cost; Machine learning; Neural networks; Public building; Regression trees; Variable reduction	EFFICIENCY; SELECTION; ACCURACY; BORUTA; MODEL	Yes	Confirmed				NEUROCOMPUTING	J	Article	6	Computer Science, Artificial Intelligence	Zekic-Susac, M; Has, A; Knezevic, M	[Zekic-Susac, Marijana; Has, Adela; Knezevic, Marinela] Univ Josip Juraj Strossmayer Osijek, Fac Econ Osijek, Trg Ljudevita Gaja 7, Osijek 31000, Croatia; [Knezevic, Marinela] Univ Zagreb, Fac Org & Informat, Pavlinska 2, Varazhdin 42000, Croatia	10.1016/j.neucom.2020.01.124		Croatia
	2021	Prediction of Fuel Poverty Potential Risk Index Using Six Regression Algorithms: A Case-Study of Chilean Social Dwellings	In recent times, studies about the accuracy of algorithms to predict different aspects of energy use in the building sector have flourished, being energy poverty one of the issues that has received considerable critical attention. Previous studies in this field have characterized it using different indicators, but they have failed to develop instruments to predict the risk of low-income household…	fuel poverty potential risk index; multilayer perceptron; K-nearest neighbors; tree models; support vector regression	ARTIFICIAL NEURAL-NETWORKS; ENERGY POVERTY; RESIDENTIAL BUILDINGS; RANDOM FOREST; TIME-SERIES; MODELS; RECOGNITION; PERSPECTIVE; EFFICIENCY; CLIMATE	Yes	Confirmed	Modeling method contribution	CO2 emission/energy consumption prediction		SUSTAINABILITY	J	Article	0	Green & Sustainable Science & Technology; Environmental Sciences; Environmental Studies	Bienvenido-Huertas, D; Pulido-Arcas, JA; Rubio-Bellido, C; Perez-Fargallo, A	[Bienvenido-Huertas, David; Rubio-Bellido, Carlos] Univ Seville, Dept Bldg Construct 2, Seville 41012, Spain; [Pulido-Arcas, Jesus A.] Univ Tokyo, Grad Sch Arts & Sci, Tokyo 1538902, Japan; [Perez-Fargallo, Alexis] Univ Bio Bio, Dept Bldg Sci, Concepcion 410300, Chile	10.3390/su13052426		Chile
Buildings	2020	REDUCTION of non-linear many objectives for coordinated operation of integrated ENERGY systems	This paper establishes a model that considers different types of indices for the coordinated operation of integrated ENERGY systems (IES), such as economic indices, environmental indices, security and stability indices. A many-objective optimization problem (MaOP) is developed to treat each index independently as objectives to participate in the optimization rather than constraints. In order to R…	REDUCTION of non-linear many objectives; PRINCIPAL COMPONENT ANALYSIS; Maximum variance unfolding; Kernel matrix; Coordinated operation; Integrated ENERGY systems	power dispatch; natural-gas; multiobjective optimization; DEMAND response; electriCITY; strategy	Yes	Confirmed	District heating and cooling	Utility infrastructure planning		International journal of electrical power & energy systems	J	Article	0	Engineering, Electrical & Electronic	Qin, YJ; Zheng, JH; Li, ZG; Wu, QH	[Qin, Y. J.; Zheng, J. H.; Li, Zhigang; Wu, Q. H.] South China Univ Technol, Sch Elect Power Engn, Guangzhou 510640, Peoples R China; [Wu, Q. H.] Univ Liverpool, Dept Elect Engn & Elect, Liverpool L69 3GJ, Merseyside, England	10.1016/j.ijepes.2019.105657
	2020	Influencing factors analysis and forecasting of RESIDENTIAL ENERGY-related CO2 emissions utilizing optimized SUPPORT VECTOR MACHINE	With the economy development and rapid URBANIZATION, the RESIDENTIAL USAGE of ENERGY has been increasing in China, leading to more CO2 emissions in resident sector. To predict the trend of RESIDENTIAL ENERGY-related CO2 emissions accurately, it is significant to analyze the influential factors. In this paper, 18 preliminary indicators are identified by grey relational analysis to prove their corr…	CO2 emissions; PRINCIPAL COMPONENT ANALYSIS; Chicken swarm optimization; SUPPORT VECTOR MACHINE	HOUSEHOLD carbon emissions; dioxide emissions; decomposition analysis; quantile regression; china; CONSUMPTION; URBAN; sector; hebei; URBANIZATION	Yes	Confirmed	CO2 emission/energy consumption prediction			Journal of cleaner production	J	Article	0	Green & Sustainable Science & Technology; Engineering, Environmental; Environmental Sciences	Wen, L; Cao, Y	[Wen, Lei; Cao, Yang] North China Elect Power Univ, Dept Econ & Management, Baoding 071003, Hebei, Peoples R China	10.1016/j.jclepro.2019.119492	Shanghai	China
	2020	Assessing the willingness of RESIDENTIAL electriCITY consumers to adopt DEMAND side management and distributed ENERGY resources: A case study on the Japanese market	Realizing the full potential of a smart grid is contingent on the RESIDENTIAL USERS' acceptance of new technologies and the behavioural changes that will follow their implementation. Thus, the present research attempted to gain an insight into the factors that drive RESIDENTIAL electriCITY consumers, particularly those with low income, TOWARDS or away from DEMAND side management and distributed E…	DEMAND side management; Distributed ENERGY resources; RESIDENTIAL electriCITY consumers; Smart grid; Kashiwa CITY	behavior; power; perceptions; acceptance; engagement; grids; USER	Yes	Confirmed	Consumer behavior			Energy policy	J	Article	0	Economics; Energy & Fuels; Environmental Sciences; Environmental Studies	Iliopoulos, N; Esteban, M; Kudo, S	[Iliopoulos, Nikolaos; Kudo, Shogo] Univ Tokyo, Global Leadership Initiat, Grad Program Sustainabil Sci, Bldg Environm Studies,5-1-5 Kashiwanoha, Kashiwa, Chiba 2778563, Japan; [Esteban, Miguel] Japan Waseda Univ, Res Inst Sustainable Future Soc, Fac Civil & Environm Engn, Shinjuku Ku, 60-106,3-4-1 Okubo, Tokyo 1698555, Japan	10.1016/j.enpol.2019.111169	Kashiwa City	China
	2020	Long-term URBAN heating load predictions based on optimized retrofit orders: A cross-scenario analysis	DISTRICT HEATING technologies are essential key elements of future sUSTAINABLE ENERGY systems. In order to support the design process, further information concerning long-term developments related to URBAN heat DEMAND are crucial. Since BUILDING refurbishments are indispensable for achieving European CO2 REDUCTION objectives, strategies for DISTRICT retrofit orders are mandatory, which, in conseq…	DISTRICT HEATING; URBAN ENERGY analysis; Long-term load forecasting; Economically optimized retrofit order; NARX RECURRENT NEURAL NETWORK	outlier detection; algorithm	Yes	Confirmed	District heating and cooling	CO2 emission/energy consumption prediction		Energy and buildings	J	Article	0	Construction & Building Technology; Energy & Fuels; Engineering, Civil	Koschwitz, D; Spinnraker, E; Frisch, J; van Treeck, C	[Koschwitz, Daniel; Spinnraeker, Eric; Frisch, Jerome; van Treeck, Christoph] Rhein Westfal TH Aachen, Inst Energy Efficiency & Sustainable Bldg E3D, D-52074 Aachen, Germany	10.1016/j.enbuild.2019.109637		Germany
	2020	Nature-inspired metaheuristic ensemble model for forecasting ENERGY CONSUMPTION in RESIDENTIAL BUILDINGS	As the global economy expands, both RESIDENTIAL and commercial BUILDINGS consume an increasing proportion of the total ENERGY that is USED by BUILDINGS. ENERGY simulation and forecasting are important in setting ENERGY POLICY and making decisions in pursuit of sUSTAINABLE development, This work develops a new ensemble model, called the Evolutionary Neural Machine Inference Model (ENMIM), for esti…	ENERGY CONSUMPTION; RESIDENTIAL BUILDINGS; Ensemble model; ARTIFICIAL INTELLIGENCE; MACHINE LEARNING; Evolutionary optimization	SUPPORT VECTOR MACHINE; symbiotic organisms search; artificial neural-network; cooling loads; intelligence; performance; prediction; regression; sector	Yes	Confirmed	Building-level			Energy	J	Article	0	Thermodynamics; Energy & Fuels	Tran, DH; Luong, DL; Chou, JS	[Duc-Hoc Tran; Duc-Long Luong] Vietnam Natl Univ Ho Chi Minh, Ho Chi Minh City Univ Technol, Dept Construct Engn & Management, City VNU HCM, Ho Chi Minh City, Vietnam; [Chou, Jui-Sheng] Natl Taiwan Univ Sci & Technol, Dept Civil & Construct Engn, Taipei, Taiwan	10.1016/j.energy.2019.116552	Ho Chi Minh City	Vietnam
	2020	DEEP LEARNING in Modeling ENERGY Cost of BUILDINGS in the Public Sector	The cost of ENERGY consumed in educational, health, public administration, military, and other types of public BUILDINGS constitutes a substantial proportion of the total expenditure of the public sector. Due to a large number of attributes that influence the ENERGY cost of a BUILDING, most of the models developed in the literature USE only a subset of predictors, often neglect occupational data,…	ENERGY cost; DEEP LEARNING; NEURAL NETWORKS; Public sector	accuracy	Yes	Confirmed	Building-level	Retrofit envelope		14th international conference on soft computing models in industrial and environmental applications (soco 2019)	S	Proceedings Paper	0	Computer Science, Artificial Intelligence; Computer Science, Interdisciplinary Applications	Zekie-Susac, M; Knezevic, M; Scitovski, R	[Zekie-Susac, Marijana; Knezevic, Marinela] Univ Josip Juraj Strossmayer Osijek, Fac Econ, Trg Ljudevita Gaja 7, Osijek 31000, Croatia; [Scitovski, Rudolf] Univ Josip Juraj Strossmayer Osijek, Dept Math, Trg Ljudevita Gaja 6, Osijek 31000, Croatia	10.1007/978-3-030-20055-8_10		Croatia
	2021	ClUSTERING and classification of ENERGY meter data: A comparison analysis of data from individual HOMES and the aggregated data from multiple HOMES	The transition TOWARDS a more sUSTAINABLE environment requires the development of new control systems on the DEMAND side to integrate renewable ENERGY sources into the ENERGY systems. For this purpose, ENERGY meter data of HOMES have been broadly USED in modelling, forecast and optimal control of ENERGY USE. However, USABILITY and reliability of HOUSEHOLD ENERGY meter data have not been specifica…	smart meter data; daily profile; clUSTERING; classification; data USABILITY; heat substation	load profiles	Yes	Confirmed	Building-level	District heating and cooling		Building simulation	J	Article; Early Access	0	Thermodynamics; Construction & Building Technology	Sala, J; Li, RL; Christensen, MH	[Sala, Juan; Li, Rongling] Tech Univ Denmark, Dept Civil Engn, Lyngby, Denmark; [Christensen, Morten H.] Tech Univ Denmark, Dept Elect Engn, Lyngby, Denmark	10.1007/s12273-019-0587-4	Copenhagen	Denmark
	2019	Artificial NEURAL NETWORKS to assess ENERGY and environmental performance of BUILDINGS: An Italian case study	Approximately 40% of the European ENERGY CONSUMPTION and a large proportion of environmental impacts are related to the BUILDING sector. However, the selection of adequate and correct designs can provide considerable ENERGY SAVINGS and REDUCE environmental impacts. To achieve this objective, a simultaneous ENERGY and environmental assessment of a BUILDING's life cycle is necessary. To date, the r…	BUILDING ENERGY DEMAND; Artificial NEURAL NETWORK; ENERGY balance; Life cycle assessment; Environmental impacts; Decision support tool	life-cycle assessment; construction sector; carbon emissions; wheat production; embodied ENERGY; early-stage; DEMAND; CONSUMPTION; DISTRICT; evaluate	Yes	Confirmed	Building-level			Journal of cleaner production	J	Article	1	Green & Sustainable Science & Technology; Engineering, Environmental; Environmental Sciences	D'Amico, A; Ciulla, G; Traverso, M; Lo Brano, V; Palumbo, E	[D'Amico, A.; Ciulla, G.; Lo Brano, V.] Univ Palermo, Palermo, Italy; [D'Amico, A.; Ciulla, G.; Lo Brano, V.] Dept Engn DI, Pisa, Italy; [Traverso, M.; Palumbo, E.] Rhein Westfal TH Aachen, Inst Sustainabil Civil Engn, Aachen, Germany	10.1016/j.jclepro.2019.117993	Palermo	Italy
	2019	NEURAL NETWORK model for short-term and very-short-term load forecasting in DISTRICT BUILDINGS	Load forecasting plays an important role in ENERGY management in smart BUILDINGS. It is expected that precise prediction of loads can bring significant economic benefits to smart BUILDINGS by enabling accurate DEMAND response strategies for peak load REDUCTION, REDUCING electriCITY USE and integrating distributed ENERGY resources. The complexity increases for load prediction in case of a DISTRICT…	Short-term load forecasting; Artificial NEURAL NETWORK (ANN); Bayesian regularization (BR); Levenberg marquardt (LM); DISTRICT BUILDINGS; Mean absolute percentage error (MAPE)	ENERGY; CONSUMPTION; regression; DEMAND	Yes	Confirmed	Building-level			Energy and buildings	J	Article	1	Construction & Building Technology; Energy & Fuels; Engineering, Civil	Dagdougui, H; Bagheri, F; Le, H; Dessaint, L	[Dagdougui, Hanane; Bagheri, Fatemeh] Polytech Montreal, Dept Math & Ind Engn, CP 6079,Succ Ctr Ville, Montreal, PQ H3C 3A7, Canada; [Le, Hieu; Dessaint, Louis] ETS, Dept Elect Engn, 1100 Notre Dame St W, Notre Dame, PQ H3C 1K3, Canada	10.1016/j.enbuild.2019.109408	Montréal	Canada
	2019	Identification and evaluation of operation regulation strategies in DISTRICT HEATING substations based on an unsupervised data mining method	In DISTRICT HEATING (DH) substations, the operation regulation strategy has a significant impact on heating-ENERGY CONSUMPTION. To effectively diagnose and optimize the operation of DH substations, existing regulation strategies should be quantitatively identified and evaluated utilizing historical heating operation data. However, the individualization of regulation strategy caUSED by different B…	Operation regulation; Strategies identification; Operation evaluation; Unsupervised clUSTERING	ENERGY-CONSUMPTION patterns; SUPPORT VECTOR MACHINE; knowledge discovery; load prediction; fault-detection; BUILDINGS; profiles; systems; DEMAND	Yes	Confirmed	District heating and cooling	Operational efficiency		Energy and buildings	J	Article	0	Construction & Building Technology; Energy & Fuels; Engineering, Civil	Lu, YK; Tian, Z; Peng, P; Niu, JD; Dai, JP	[Lu, Yakai; Tian, Zhe; Niu, Jide; Dai, Jiping] Tianjin Univ, Sch Environm Sci & Engn, Key Lab Efficient Utilizat Low & Medium Grade Ene, MOE, Tianjin 300072, Peoples R China; [Peng, Peng] Tianjin Univ, Architecture Design Inst, Tianjin 300072, Peoples R China	10.1016/j.enbuild.2019.07.041	Tianjin	China
	2019	An ENERGY planning oriented method for analyzing spatial-temporal characteristics of electric loads for heating/cooling in DISTRICT BUILDINGS with a case study of one university campus	Accurate grasp of DISTRICT power DEMAND is of great significance to both sizing of DISTRICT power supply and its operation optimization. In this study, an index system has been established and visualized through a Geographic Information System, for revealing both temporal and spatial characteristics of DISTRICT power loads caUSED by heating/cooling systems, including load level and fluctuation ch…	DISTRICT electric load for heating and cooling; Spatial-temporal characteristics; Load coupling; Campus BUILDINGS; GIS	CONSUMPTION; gis	Yes	Confirmed	Building-level			Sustainable cities and society	J	Article	0	Construction & Building Technology; Green & Sustainable Science & Technology; Energy & Fuels	Chen, SQ; Zhang, XY; Wei, S; Yang, T; Guan, J; Yang, WX; Qu, LJ; Xu, YQ	[Chen, Shuqin; Zhang, Xiyong; Yang, Wenxiao] Zhejiang Univ, Coll Civil Engn & Architecture, Hangzhou, Zhejiang, Peoples R China; [Wei, Shen] UCL, Bartlett Sch Construct & Project Management, London, England; [Yang, Tong] Middlesex Univ, Fac Sci & Technol, London, England; [Guan, Jun] Nanjing Univ Sci & Technol, Sch Energy & Power Engn, Nanjing, Jiangsu, Peoples R China; [Qu, Lijuan] Zhejiang Univ…	10.1016/j.scs.2019.101629		China
	2019	New methods for clUSTERING DISTRICT HEATING USERS based on CONSUMPTION patterns	Understanding ENERGY USERS' CONSUMPTION patterns benefits both utility companies and consumers as it can support improving ENERGY management and USAGE strategies. The rapid deployment of smart metering facilities has enabled the analysis of CONSUMPTION patterns based on high-precision real USAGE data. This paper investigates data-driven UNSUPERVISED LEARNING techniques to partition DISTRICT HEATI…	DISTRICT HEATING; USER clUSTERING; ENERGY CONSUMPTION pattern; Feature extrACTION	ENERGY USE; electriCITY; model; DEMAND	Yes	Confirmed	District heating and cooling	Consumer behavior		Applied energy	J	Article	0	Energy & Fuels; Engineering, Chemical	Wang, C; Du, YY; Li, HL; Wallin, F; Min, G	[Wang, Chao; Du, Yuyan] Tongji Univ, Dept Informat & Commun Engn, Shanghai, Peoples R China; [Li, Hailong; Wallin, Fredrik] Malardalen Univ, Future Energy, Vasteras, Sweden; [Wang, Chao; Min, Geyong] Univ Exeter, Dept Comp Sci, Exeter, Devon, England	10.1016/j.apenergy.2019.113373		Sweden
	2019	Coal CONSUMPTION prediction model of space heating with feature selection for rural residences in severe cold area in China	Identification of optimal subsets of input variables is a primary task in data-driven prediction modeling for the coal CONSUMPTION for space heating (CCSH) of rural residences. However, most related predictive models of CCSH in rural residences ignore the nonlinear relationship between the factors and CCSH, and are short of feature selection process. This paper proposed an enhanced CCSH predictio…	Rural residences; Inner Mongolia; ENERGY CONSUMPTION; Space heating; Feature selection; SUPPORT VECTOR MACHINE (SVM) model; Sensitivity analysis; Partial least squares regression(PLSR); RANDOM FOREST(RF)	BUILDING ENERGY-CONSUMPTION; indoor thermal comfort; kang system; variable selection; regression; performance; environment; simulation; challenges	Yes	Confirmed	CO2 emission/energy consumption prediction	Building-level		Sustainable cities and society	J	Article	1	Construction & Building Technology; Green & Sustainable Science & Technology; Energy & Fuels	Yuan, PL; Lin, DM; Wang, ZS	[Yuan, Pengli; Lin Duanmu; Wang, Zongshan] Dalian Univ Technol, Sch Civil Engn, Lab Bldg Environm & Equipment Engn, Dalian, Peoples R China	10.1016/j.scs.2019.101643	Chifeng	China
	2019	What's in the box?! TOWARDS explainable MACHINE LEARNING applied to non-RESIDENTIAL BUILDING smart meter classification	Feature engineering and data-driven classification models are at the forefront of analysis of large temporal sensor data from the BUILT ENVIRONMENT. In previous efforts, temporal features were engineered from the whole BUILDING hourly electrical meter data from 507 non-RESIDENTIAL BUILDINGS. These features fall within the three general categories of statistics, model, and pattern-based and can be…	Interpretable MACHINE LEARNING; Explainable MACHINE LEARNING; BUILDING performance analysis; Performance classification; ENERGY EFFICIENCY; Smart meter; Temporal feature engineering; Load clUSTERING; Data science; CUSTOMER segmentation; Time-series analysis	ENERGY; prediction; analytics	Yes	Confirmed	Building-level			Energy and buildings	J	Article	0	Construction & Building Technology; Energy & Fuels; Engineering, Civil	Miller, C	[Miller, Clayton] Natl Univ Singapore, Sch Design & Environm, Dept Bldg, Bldg & Urban Data Sci Buds Grp, Singapore 117566, Singapore	10.1016/j.enbuild.2019.07.019
	2019	Forecasting DISTRICT-scale ENERGY dynamics through integrating BUILDING network and LONG SHORT-TERM MEMORY learning algorithm	With the development of data-driven techniques, DISTRICT-scale BUILDING ENERGY prediction has attracted increasing attention in recent years for revealing ENERGY USE patterns and REDUCTION potentials. However, data acquisition in large BUILDING groups is difficult and adjacent BUILDINGS also interact with each other. To REDUCE data cost and incorporate the inter-BUILDING impact with the data-driv…	DISTRICT-scale BUILDING ENERGY modeling; Data-driven prediction; BUILDING network; LONG SHORT-TERM MEMORY networks	occupancy prediction; office BUILDINGS; CONSUMPTION; CITY; impact; performance; strategies; model; stock; classification	Yes	Confirmed	CO2 emission/energy consumption prediction			Applied energy	J	Article; Proceedings Paper	5	Energy & Fuels; Engineering, Chemical	Wang, W; Hong, TZ; Xu, XD; Chen, JY; Liu, Z; Xu, N	[Wang, Wei; Xu, Xiaodong; Liu, Ziang; Xu, Ning] Southeast Univ, Sch Architecture, 2 Sipailou, Nanjing, Jiangsu, Peoples R China; [Hong, Tianzhen] Lawrence Berkeley Natl Lab, Bldg Technol & Urban Syst Div, Cyclotron Rd, Berkeley, CA 94720 USA; [Chen, Jiayu] City Univ Hong Kong, Dept Architecture & Civil Engn, Kowloon, Y6621,AC1,Tat Chee Ave, Hong Kong, Peoples R China	10.1016/j.apenergy.2019.04.085	Nanjing	China
	2019	ENERGY Management through Cost Forecasting for RESIDENTIAL BUILDINGS in New Zealand	Over the last two decades, the RESIDENTIAL BUILDING sector has been one of the largest ENERGY CONSUMPTION sectors in New Zealand. The relationship between that sector and HOUSEHOLD ENERGY CONSUMPTION should be carefully studied in order to optimize the ENERGY CONSUMPTION structure and satisfy ENERGY DEMANDS. Researchers have made efforts in this field; however, few have concentrated on the associ…	RESIDENTIAL ENERGY USE; ENERGY management; RESIDENTIAL BUILDING costs; exponential smoothing method; ARIMA model; ANNs model	electriCITY CONSUMPTION; thermal insulation; neural-networks; design; optimization; EFFICIENCY; prediction; envelope; DEMAND; refurbishment	Yes	Confirmed	Building-level			Energies	J	Article	3	Energy & Fuels	Zhao, LL; Liu, ZS; Mbachu, J	[Zhao, Linlin; Liu, Zhansheng] Beijing Univ Technol, Coll Architecture & Civil Engn, Beijing 100124, Peoples R China; [Mbachu, Jasper] Bond Univ, Fac Soc & Design, Gold Coast 4226, Australia	10.3390/en12152888		New Zealand
	2019	Parametric investigation of traditional vaulted roofs in hot-arid CLIMATES	In the Mediterranean and North African regions, traditional vaulted roof forms have been widely USED due to their significant influence on enhancing thermal indoor conditions. This research parametrically investigates the thermal performance of vaulted roofs, seeking a better understanding of the reciprocal relationship between the solar irradiance received by these roofs and the resulting ENERGY…	Solar irradiance; ENERGY CONSUMPTION; Vaulted roofs; Parametric approach; PRINCIPAL COMPONENT ANALYSIS	thermal-behavior; performance; BUILDINGS; radiation	Yes	Confirmed	Retrofit envelope			Renewable energy	J	Article	0	Green & Sustainable Science & Technology; Energy & Fuels	Elnokaly, A; Ayoub, M; Elseragy, A	[Elnokaly, Amira] Univ Lincoln, Sch Architecture & Built Environm, Lincoln, England; [Ayoub, Mohammed; Elseragy, Ahmed] Arab Acad Sci Technol & Maritime Transport, Architectural Engn & Environm Design Dept, Alexandria, Egypt	10.1016/j.renene.2019.01.061	Aswan	Egypt
	2019	Forecasting in Blockchain-Based Local ENERGY Markets	Increasingly volatile and distributed ENERGY production challenges traditional mechanisms to manage grid loads and price ENERGY. Local ENERGY markets (LEMs) may be a response to those challenges as they can balance ENERGY production and CONSUMPTION locally and may lower ENERGY costs for consumers. Blockchain-based LEMs provide a decentralized market to local ENERGY consumer and prosumers. They im…	blockchain; local ENERGY market; smart contract; smart meter; short-term ENERGY forecasting; MACHINE LEARNING; least absolute shrinkage and selection operator (LASSO); LONG SHORT-TERM MEMORY (LSTM); prediction errors; market mechanism; market simulation		Yes	Confirmed	Building-level	Demand response		Energies	J	Article	1	Energy & Fuels	Kostmann, M; Hardle, WK	[Kostmann, Michael] Humboldt Univ, Sch Business & Econ, Spandauer Str 1, D-10178 Berlin, Germany; [Haerdle, Wolfgang K.] Humboldt Univ, Sch Business & Econ, Ladislaus von Bortkiewicz Chair Stat, Unter Linden 6, D-10099 Berlin, Germany; [Haerdle, Wolfgang K.] Xiamen Univ, Wang Yanan Inst Studies Econ, 422 Siming Rd, Xiamen 361005, Fujian, Peoples R China; [Haerdle, Wolfgang K.] Charles Univ Prague…	10.3390/en12142718		Germany
	2019	TOWARDS metamodeling the NEIGHBORHOOD-level grid impact of LOW-CARBON technologies	Heating electrification and distributed renewable generation in the RESIDENTIAL sector are among prominent solutions advocated for ENERGY SAVING and carbon emission REDUCTION. However, research shows these LOW-CARBON technologies may create issues at the low-voltage (LV) distribution grid. High-level POLICY assessment currently lacks the support to take into account such local grid restrictions. …	Grid impact; Probabilistic framework; Metamodeling; Low-voltage; Heat pump; PV; Modelica	SUPPORT VECTOR REGRESSION; BUILDING ENERGY-CONSUMPTION; heat-pumps; distribution network; forecasting techniques; engineering design; voltage regulation; neural-network; model; penetration	Yes	Confirmed	CO2 emission/energy consumption prediction	Modeling method contribution	Utility infrastructure planning	Energy and buildings	J	Article	0	Construction & Building Technology; Energy & Fuels; Engineering, Civil	Protopapadaki, C; Saelens, D	[Protopapadaki, Christina] Katholieke Univ Leuven, Dept Civil Engn, Bldg Phys Sect, Kasteelpk Arenberg 40, B-3001 Heverlee, Belgium; EnergyVille, Thor Pk 8310, B-3600 Genk, Belgium	10.1016/j.enbuild.2019.04.031
	2019	Optimising RESIDENTIAL electric vehicle charging under renewable ENERGY: Multi-agent learning in software simulation and hardware-in-the-loop evaluation	The integration of intermittent renewable ENERGY sources coupled with the increasing DEMAND of electric vehicles (EVs) poses new challenges to the electrical grid. To address this, many solutions based on DEMAND response have been presented. These solutions are typically tested only in software-based simulations. In this paper, we present the application in hardware-in-the-loop (HIL) of a recentl…	DEMAND response; electric vehicles; hardware-in-the-loop; microgrid; multi-agent REINFORCEMENT LEARNING; renewable ENERGY	DEMAND response; storage systems; microgrids; management	Yes	Confirmed	Demand response	charging infrastructure		International journal of energy research	J	Article	0	Energy & Fuels; Nuclear Science & Technology	Marinescu, A; Taylor, A; Clarke, S; Serban, I; Marinescu, C	[Marinescu, Andrei; Taylor, Adam; Clarke, Siobhan] Trinity Coll Dublin, Dublin, Ireland; [Serban, Ioan; Marinescu, Corneliu] Transilvania Univ Brasov, Brasov, Romania	10.1002/er.4559
	2019	A data mining-based method for revealing occupant behavior patterns in USING mechanical ventilation systems of Dutch DWELLINGS	Occupant behaviors influence the ENERGY CONSUMPTION of DWELLING mechanical ventilation systems significantly. There is still a lack of effective method to analyze the occupant behaviors in adjUSTING the mechanical ventilation systems in BUILDINGS. Therefore, this study proposes a data mining-based method to reveal the occupant behavior patterns and the motivations behind. A first derivative GaUSS…	Data mining; Occupant behavior pattern; Mechanical ventilation system; DWELLING	BUILDING ENERGY-CONSUMPTION; performance; simulation; knowledge; framework; impact; gap	Yes	Confirmed	Consumer behavior			Energy and buildings	J	Article	1	Construction & Building Technology; Energy & Fuels; Engineering, Civil	Ren, XYY; Zhang, CB; Zhao, Y; Boxem, G; Zeiler, W; Li, TT	[Ren, Xinyuyang; Zhang, Chaobo; Zhao, Yang; Li, Tingting] Zhejiang Univ, Inst Refrigerat & Cryogen, Hangzhou, Zhejiang, Peoples R China; [Ren, Xinyuyang; Boxem, Gert; Zeiler, Wim] Eindhoven Univ Technol, Dept Built Environm, Eindhoven, Netherlands	10.1016/j.enbuild.2019.03.047	Roosendaal	Netherlands
	2019	Feature Selection and Evolutionary Rule Learning for Big Data in Smart BUILDING ENERGY Management	Since BUILDINGS are one of the largest sources of ENERGY CONSUMPTION in most CITIES of the world, ENERGY management is one of the major concerns in their design. To ameliorate this problem, BUILDINGS are becoming smarter by the incorporation of intelligent supervision and control systems. Data captured by the sensors can be interpreted and processed by rule-based computation methods of biological…	Regression methods for Big Data; Feature selection; Fuzzy TSK rules	neural-network models; fuzzy-systems; indoor temperature; prediction; machine; analytics; humidity	Yes	Confirmed	Operational efficiency			Cognitive computation	J	Article	1	Computer Science, Artificial Intelligence; Neurosciences	Rodriguez-Mier, P; Mucientes, M; Bugarin, A	[Rodriguez-Mier, Pablo; Mucientes, Manuel; Bugarin, Alberto] Univ Santiago de Compostela, Ctr Singular Invest Tecnol Informat CiTIUS, Santiago De Compostela, Spain	10.1007/s12559-019-09630-6	New York City	USA
	2019	An analysis of errors in the ENERGY Performance certificate database	ENERGY Performance Certificates (EPCs) are the adopted method by which the UK government tracks the progress of its domestic ENERGY EFFICIENCY POLICIES. Over 15 million EPCs have been lodged, representing a valuable resource for research into the UK BUILDING stock. However, the EPC record has a reputation of containing multiple errors. In this work, we identify many such errors and quantify how c…	ENERGY performance directive; ENERGY performance certificates; Retrofit; England; Wales; DWELLINGS	ratings; prices; impact	Yes	Confirmed	Building-level			Energy policy	J	Article	2	Economics; Energy & Fuels; Environmental Sciences; Environmental Studies	Hardy, A; Glew, D	[Hardy, A.; Glew, D.] Leeds Beckett Univ, Leeds LS2 9EN, W Yorkshire, England	10.1016/j.enpol.2019.03.022		United Kingdom
	2019	DEEP LEARNING for multi-scale smart ENERGY forecasting	Short-term load prediction at the DISTRICT-level is essential for feeders, substations, consumers and transformers starts from 1-h to one-week ahead. Though, the critical problem is in the design of complex load characteristics, switching operations and a large number of junctions at electrical distribution feeders. To overcome the design challenges, this research conducted an analysis of short-t…	DEEP LEARNING; ENERGY forecasting; ENERGY EFFICIENCY; Renewable ENERGY; Short term interval	BUILDING cooling load; belief network; medium-term; fault-diagnosis; power DEMAND; prediction; management; algorithm; machine; CONSUMPTION	Yes	Confirmed	CO2 emission/energy consumption prediction			Energy	J	Article	3	Thermodynamics; Energy & Fuels	Ahmad, T; Chen, HX	[Ahmad, Tanveer; Chen, Huanxin] Huazhong Univ Sci & Technol, Sch Energy & Power Engn, Wuhan 430074, Hubei, Peoples R China	10.1016/j.energy.2019.03.080
	2019	Accommodation of curtailed wind power by electric water heaters based on a new hybrid prediction approach	Wind power curtailment is of great importance with the increase of large-scale wind power connected to the grid. A new concept of REDUNDANT wind power accommodated by dispatching electric water heaters (EWHs) is developed in the paper. Precise predictions of wind power and EWHs load power are the basis for this work. A hybrid multi-kernel prediction approach integrating an adaptive fruit fly opti…	Wind power curtailment; Electric water heaters; Dispatching model; Relevance vector machine; Prediction model	DEMAND response; neural-network; generation; system; pumps; optimization; integration	Yes	Confirmed	Demand response			Journal of modern power systems and clean energy	J	Article	0	Engineering, Electrical & Electronic	Yu, Y; Mi, ZQ; Zheng, XM; Chang, D	[Yu, Yang; Mi, Zengqiang; Zheng, Xiaoming; Chang, Da] North China Elect Power Univ, State Key Lab Alternate Elect Power Syst Renewabl, Baoding 071003, Peoples R China; [Yu, Yang; Mi, Zengqiang] North China Elect Power Univ, Hebei Key Lab Distributed Energy Storage & Microg, Baoding 071003, Peoples R China	10.1007/s40565-018-0439-8		China
	2019	Human-in-the-loop ENERGY flexibility integration on a NEIGHBOURHOOD level: Small and Big Data management	Modern BUILDINGS provide an enormous amount of data available from various sources ranging from modular wireless sensors to smart meters. As well as enhancing ENERGY management and BUILDING performance, the analysis of these datasets can enhance the management of decentralized ENERGY systems (electrical storage, PV generation, heat storage, etc.). To optimize the interACTION between the BUILDING …	BEMS; Big Data; ENERGY flexibility; NEIGHBOURHOOD ENERGY management; Small Data; smart grid	DEMAND-side management; RESIDENTIAL BUILDINGS; occupancy detection; smart; systems; storage; information	Yes	Confirmed	Demand response	Building-level		Building services engineering research & technology	J	Article	2	Construction & Building Technology	Zeiler, W; Labeodan, T	[Zeiler, Wim; Labeodan, Timi] Univ Technol Eindhoven, Dept Built Environm, Eindhoven, Netherlands	10.1177/0143624418823190	Breda	Netherlands
	2019	Prediction interval methodology based on fuzzy numbers and its extension to fuzzy systems and NEURAL NETWORKS	Prediction interval modelling has been proposed in the literature to characterize uncertain phenomena and provide USEFUL information from a decision-making point of view. In most of the reported studies, assumptions about the data distribution are made and/or the models are trained at one step ahead, which can decrease the quality of the interval in terms of the information about the uncertainty …	Prediction interval; Fuzzy number; Neuronal network; Renewable ENERGY; Microgrid	ENERGY management-system; farm generation forecasts; power-generation; logic systems; identification; load; optimization; models	Yes	Confirmed	Building-level			Expert systems with applications	J	Article	3	Computer Science, Artificial Intelligence; Engineering, Electrical & Electronic; Operations Research & Management Science	Marin, LG; Cruz, N; Saez, D; Sumner, M; Nunez, A	[Marin, Luis G.; Cruz, Nicolas; Saez, Doris] Univ Chile, Dept Elect Engn, Santiago, Chile; [Sumner, Mark] Univ Nottingham, Dept Elect & Elect Engn, Nottingham NG7 2RD, England; [Nunez, Alfredo] Delft Univ Technol, Sect Railway Engn, Delft, Netherlands	10.1016/j.eswa.2018.10.043	Loughborough, Huatacondo	United Kingdom, Chile
	2019	Real time optimal control of DISTRICT COOLING system with thermal ENERGY storage USING NEURAL NETWORKS	Thermal ENERGY storage can be utilized as an effective component in ENERGY systems to maximize cost SAVINGS when time-of-USE (TOU) pricing or real-time pricing (RTP) is in place. This study proposes a novel approach that can effectively predict performance and determine control strategy of thermal ENERGY storage (i.e., ice storage) in a DISTRICT COOLING system. The proposed approach utilizes NEUR…	Ice thermal storage; Real-time control; NEURAL NETWORKS; Genetic algorism; University campus BUILDINGS	model-predictive control; DEMAND response; commercial BUILDINGS; load; technologies; management; operation; heat	Yes	Confirmed	District heating and cooling			Applied energy	J	Article	6	Energy & Fuels; Engineering, Chemical	Cox, SJ; Kim, D; Cho, H; Mago, P	[Cox, Sam J.; Kim, Dongsu; Cho, Heejin; Mago, Pedro] Mississippi State Univ, Dept Mech Engn, Ms State, MS 39762 USA	10.1016/j.apenergy.2019.01.093	Mississippi	USA
	2019	Intelligent Edge Computing for IoT-Based ENERGY Management in Smart CITIES	In recent years, green ENERGY management systems (smart grid, smart BUILDINGS, and so on) have received huge research and indUSTRIAL attention with the explosive development of smart CITIES. By introducing Internet of Things (IoT) technology, smart CITIES are able to achieve exquisite ENERGY management by ubiquitous monitoring and reliable communications. However, long-term ENERGY EFFICIENCY has …			Yes	Confirmed	Demand response	operational efficiency		Ieee network	J	Article	20	Computer Science, Hardware & Architecture; Computer Science, Information Systems; Engineering, Electrical & Electronic; Telecommunications	Liu, Y; Yang, C; Jiang, L; Xie, SL; Zhang, Y	[Liu, Yi; Yang, Chao; Jiang, Li; Xie, Shengli] Guangdong Univ Technol, Guangzhou, Guangdong, Peoples R China; [Zhang, Yan] Univ Oslo, Oslo, Norway	10.1109/MNET.2019.1800254
	2019	Incorporating MACHINE LEARNING with BUILDING network analysis to predict multi-BUILDING ENERGY USE	Predicting multi-BUILDING ENERGY USE at campus or CITY DISTRICT scale has recently gained more attention: and more researchers have started to define reference BUILDINGS and study inter-impact between BUILDING groups. However, how to integrate the relationship to define reference BUILDINGS and predict multi-BUILDING ENERGY USE, USING significantly less amount of BUILDING data and REDUCING complex…	Multi-BUILDING; ENERGY USE prediction; Social network analysis; Artificial NEURAL NETWORKS; MACHINE LEARNING; BUILDING network	social networks; CONSUMPTION; CITY; performance; impact; model; classification; NEIGHBORHOODS; technologies; strategies	Yes	Confirmed	Building-level			Energy and buildings	J	Article	6	Construction & Building Technology; Energy & Fuels; Engineering, Civil	Xu, XD; Wang, W; Hong, TZ; Chen, JY	[Xu, Xiaodong; Wang, Wei] Southeast Univ, Sch Architecture, 2 Sipailou, Nanjing, Jiangsu, Peoples R China; [Wang, Wei; Hong, Tianzhen] Lawrence Berkeley Natl Lab, Bldg Technol & Urban Syst Div, 1 Cyclotron Rd, Berkeley, CA 94720 USA; [Chen, Jiayu] City Univ Hong Kong, Dept Architecture & Civil Engn, Kowloon, Y6621,AC1,Tat Chee Ave, Hong Kong, Peoples R China	10.1016/j.enbuild.2019.01.002	Nanjing	China
	2019	Apples or oranges? Identification of fundamental load shape profiles for benchmarking BUILDINGS USING a large and diverse dataset	BUILDINGS are responsible for 30-40% of the anthropogenic GREENHOUSE GAS emissions and ENERGY CONSUMPTION worldwide. Thus, REDUCING the overall ENERGY USE and associated emissions in BUILDINGS is crucial for meeting sUSTAINABILITY goals for the future. In recent years, smart ENERGY meters have been deployed to enable monitoring of ENERGY USE data with hourly or sub-hourly temporal resolution. The…	BUILDING ENERGY; Load profile; ENERGY benchmarking; UNSUPERVISED LEARNING; Data analytic; Visual analytic	ENERGY benchmarking; classification; CONSUMPTION; EFFICIENCY; model	Yes	Confirmed	Building-level			Applied energy	J	Article	2	Energy & Fuels; Engineering, Chemical	Park, JY; Yang, XY; Miller, C; Arjunan, P; Nagy, Z	[Park, June Young; Yang, Xiya; Nagy, Zoltan] Univ Texas Austin, Dept Civil Architectural & Environm Engn, Intelligent Environm Lab, Austin, TX 78712 USA; [Miller, Clayton] Natl Univ Singapore, Sch Design & Environm, Dept Bldg, Bldg & Urban Data Sci BUDS Lab, Singapore, Singapore; [Arjunan, Pandarasamy] BEARS, Singapore, Singapore	10.1016/j.apenergy.2018.12.025		USA
	2019	Operational supply and DEMAND optimisation of a multi-vector DISTRICT ENERGY system USING artificial NEURAL NETWORKS and a genetic algorithm	Decentralisation of ENERGY generation and distribution to local DISTRICTS or microgrids is viewed as an important strategy to increase ENERGY EFFICIENCY, incorporate more small-scale renewable sources and REDUCE GREENHOUSE GAS emissions. To achieve these goals, an intelligent, context-aware, adaptive ENERGY management platform is required. This paper will demonstrate two DISTRICT ENERGY managemen…	Multi-vector ENERGY systems; ENERGY management; BUILDING ENERGY optimisation; Artificial NEURAL NETWORK; Genetic algorithm	model-predictive control; BUILDING ENERGY; storage-systems; power-flow; management; performance; generation; microgrids; level	Yes	Confirmed	District heating and cooling	Building-level		Applied energy	J	Article	14	Energy & Fuels; Engineering, Chemical	Reynolds, J; Ahmad, MW; Rezgui, Y; Hippolyte, JL	[Reynolds, Jonathan; Ahmad, Muhammad Waseem; Rezgui, Yacine; Hippolyte, Jean-Laurent] Cardiff Univ, Sch Engn, BRE Ctr Sustainable Engn, Cardiff CF24 3AA, S Glam, Wales	10.1016/j.apenergy.2018.11.001	Cardiff	United Kingdom
	2019	FUSING TensorFlow with BUILDING ENERGY simulation for intelligent ENERGY management in smart CITIES	BUILDINGS account for 35% of the global final ENERGY DEMAND. EFFICIENCY improvements and advanced control strategies have a significant impact in the REDUCTION of ENERGY costs and CO2 emissions. BUILDING ENERGY simulation is widely USED to help planners, contractors, and BUILDING owners analyse diverse options regarding the planning and management of ENERGY CONSUMPTION in BUILDINGS. Furthermore, …	ARTIFICIAL INTELLIGENCE; Q-LEARNING; DEEP LEARNING; Smart CITIES; Smart grid; HVAC control; MACHINE LEARNING; BUILDING simulation; REINFORCEMENT LEARNING	reinforcement; support	Yes	Confirmed	Demand response	Operational efficiency		Sustainable cities and society	J	Article	8	Construction & Building Technology; Green & Sustainable Science & Technology; Energy & Fuels	Vazquez-Canteli, JR; Ulyanin, S; Kampf, J; Nagy, Z	[Vazquez-Canteli, Jose R.; Nagy, Zoltan] Univ Texas Austin, Intelligent Environm Lab, Dept Civil Architectural & Environm Engn, 301 E Dean Keeton St Stop C1700, Austin, TX 78712 USA; [Vazquez-Canteli, Jose R.] Natl Renewable Energy Lab, 1617 Cole Blvd, Golden, CO USA; [Ulyanin, Stepan] Georgia Inst Technol, Sch Comp Sci, North Ave, Atlanta, GA 30332 USA; [Kampf, Jerome] Idiap Res Inst, Ctr Parc, …	10.1016/j.scs.2018.11.021	Austin	USA
	2019	Nonlinear autoregressive and RANDOM FOREST approaches to forecasting electriCITY load for utility ENERGY management systems	The capability to forecast how differences in patterns of utilization in various kinds of loads can influence ENERGY USAGE is an essential effort to decrease carbon emissions and DEMAND-side ENERGY management. The difference in weather change starts as the first step to change the ENERGY CONSUMPTION pattern in the domestic, commercial and indUSTRIAL sector. To find the change in CLIMATE and their…	NARM; LMSR; LSBoost; ENERGY forecasting; MACHINE LEARNING models	machine-learning-models; of-the-art; neural-networks; medium-term; DEMAND; BUILDINGS; temperature; CONSUMPTION; identification; technologies	Yes	Confirmed	Building-level			Sustainable cities and society	J	Article	10	Construction & Building Technology; Green & Sustainable Science & Technology; Energy & Fuels	Ahmad, T; Chen, HX	[Ahmad, Tanveer; Chen, Huanxin] Huazhong Univ Sci & Technol, Sch Energy & Power Engn, Wuhan, Hubei, Peoples R China	10.1016/j.scs.2018.12.013
	2019	Development of a ranking procedure for ENERGY performance evaluation of BUILDINGS based on occupant behavior	Identifying the impacts of occupants on BUILDING ENERGY CONSUMPTION has become an important issue in recent years. This is due to the interrelationship of influencing factors such as URBAN CLIMATE, BUILDING characteristics, occupant behavior, and BUILDING services and operation, which makes it challenging to identify the role of occupants in ENERGY CONSUMPTION. The research problem in this study …	BUILDING ENERGY management; Data mining; Occupant behavior	operating performance; knowledge discovery; system; patterns; clUSTER; optimization; analytics; heat	Yes	Confirmed	Consumer behavior			Energy and buildings	J	Article	3	Construction & Building Technology; Energy & Fuels; Engineering, Civil	Ashouri, M; Haghighat, F; Fung, BCM; Yoshino, H	[Ashouri, Milad; Haghighat, Fariborz] Concordia Univ, Dept Bldg Civil & Environm Engn, Montreal, PQ H3G 1M8, Canada; [Fung, Benjamin C. M.] McGill Univ, Sch Informat Studies, Montreal, PQ H3A 1X1, Canada; [Yoshino, Hiroshi] Tohoku Univ, Dept Architecture & Bldg Sci, Sendai, Miyagi, Japan	10.1016/j.enbuild.2018.11.050		Japan
	2019	Enabling DEMAND Side Management: Heat DEMAND Forecasting at CITY Level	Implementation of new ENERGY EFFICIENCY measures for the heating and BUILDING sectors is of utmost importance. DEMAND side management offers means to involve individual BUILDINGS in the optimization of the heat DEMAND at CITY level to improve ENERGY EFFICIENCY. In this work, two models were applied to forecast the heat DEMAND from individual BUILDINGS up to a CITY-wide area. DISTRICT HEATING data…	DISTRICT HEATING; heat DEMAND; prediction; BUILDING; parameter estimation; DEMAND response; NARX	thermal load prediction; SUPPORT VECTOR MACHINE; neural-network; data-driven; ENERGY-CONSUMPTION; weather forecast; DISTRICT; BUILDINGS; model; systems	Yes	Confirmed	CO2 emission/energy consumption prediction	Building-level	district heating and cooling	Materials	J	Article	1	Materials Science, Multidisciplinary	Hietaharju, P; Ruusunen, M; Leiviska, K	[Hietaharju, Petri; Ruusunen, Mika; Leiviska, Kauko] Univ Oulu, Control Engn Environm & Chem Engn, POB 4300, FI-90014 Oulu, Finland	10.3390/ma12020202	New York City	USA
	2019	Initial investigations into USING an ensemble of deep NEURAL NETWORKS for BUILDING facade image semantic segmentation	Due to now outdated construction technology, HOUSES which have not been retrofitted since construction typically fail to meet modern ENERGY performance levels. However, identifying at a CITY scale which HOUSES could benefit the most from retrofit solutions is currently a labour intensive process. In this paper, a system that USES a vehicle mounted camera to capture pictures of RESIDENTIAL BUILDIN…	DEEP LEARNING; image segmentation; BUILDING retrofit; environmental modelling; U-Net		Yes	Confirmed	Retrofit envelope	Data provision/imputation		Remote sensing technologies and applications in urban environments iv	S	Proceedings Paper	0	Environmental Sciences; Remote Sensing; Optics	Dai, ML; Meyers, G; Tingley, DD; Mayfield, M	[Dai, Menglin; Meyers, Gregory; Tingley, Danielle Densley; Mayfield, Martin] Univ Sheffield, Dept Civil & Struct Engn, Sheffield S1 3JD, S Yorkshire, England	10.1117/12.2532828
	2019	Effects of Uncertainty Characterization of ENERGY DEMAND of a NEIGHBORHOOD on Stochastic Day-ahead Scheduling	The paper presents the effects of different statistical representation of ENERGY DEMAND of a NEIGHBORHOOD on day-ahead scheduling. A stochastic ENERGY hub model is developed to schedule the ENERGY supply and storage components in day-ahead basis. The PV supply, electrical and thermal DEMAND are considered as the uncertain parameters. In order to model them statistically, three different types of …	scheduling; stochastic; probability; distribution; ENERGY hub	probabilistic load; hub; optimization; design; wind; generation; BUILDINGS; operation; storage; performance	Yes	Confirmed	CO2 emission/energy consumption prediction	district heating and cooling		2019 ieee international conference on environment and electrical engineering and 2019 ieee industrial and commercial power systems europe (eeeic / i&cps europe)	B	Proceedings Paper	0	Energy & Fuels; Engineering, Electrical & Electronic	Shafiullah, DS; Haque, ANMM; Ngyuen, PH	[Shafiullah, D. S.; Haque, A. N. M. M.; Ngyuen, P. H.] Eindhoven Univ Technol, Dept Elect Engn, Eindhoven, Netherlands; [Ngyuen, P. H.] Luxembourg Inst Sci & Technol, SUSTAIN ERIN, Sustainable Energy Syst Grp, Belvaux, Luxembourg	10.1109/EEEIC.2019.8783801	Amsterdam	Netherlands
	2019	A REINFORCEMENT LEARNING Approach to Solve Service Restoration and Load Management SimultaneoUSLY for Distribution Networks	ENERGY and economy are increasing the relationship over the years, where the ENERGY becomes a significant resource to keep a country developing, and it supports its economy. Then, more reliable the ENERGY should become, especially the distribution network, to keep the entire process running. In this level of ENERGY distribution, where RESIDENTIAL consumers and medium and small indUSTRIES are supp…	Computational intelligence; load management; Q-LEARNING; power distribution; power operation; REINFORCEMENT LEARNING; self-healing	DEMAND response; classification; machine; system; impact	Yes	Confirmed	Demand response			Ieee access	J	Article	1	Computer Science, Information Systems; Engineering, Electrical & Electronic; Telecommunications	Ferreira, LR; Aoki, AR; Lambert-Torres, G	[Ferreira, Lucas Roberto; Aoki, Alexandre Rasi] Univ Fed Parana, Elect Engn Dept, BR-80060000 Curitiba, Parana, Brazil; [Ferreira, Lucas Roberto] Siemens Ltda, BR-80215182 Curitiba, Parana, Brazil; [Lambert-Torres, Germano] Gnarus Inst, Res & Dev Dept, BR-37500052 Itajuba, Brazil	10.1109/ACCESS.2019.2946282	Curtiba	Brazil
	2019	MACHINE LEARNING-Based Prediction of BUILDING Water CONSUMPTION for Improving BUILDING Water EFFICIENCY	Improving BUILDING water EFFICIENCY is crucial in meeting the long-term water needs of URBAN dwellers and achieving global sUSTAINABILITY targets. Although a body of research efforts has been conducted on modeling URBAN water USE, there is still a limited understanding of the impacts of various factors on water CONSUMPTION in different geographic regions, and of the interdependencies of BUILDING …			Yes	Confirmed	operational efficiency			Computing in civil engineering 2019: smart cities, sustainability, and resilience	B	Proceedings Paper	0	Computer Science, Interdisciplinary Applications; Engineering, Civil	Wang, LF; El-Gohary, NM	[Wang, Lufan; El-Gohary, Nora M.] Univ Illinois, Dept Civil & Environm Engn, Urbana, IL 61801 USA		New York City, Boston, Philadelphia	USA
	2019	Spatial and Temporal Modeling of URBAN BUILDING ENERGY CONSUMPTION USING MACHINE LEARNING and Open Data	Understanding the spatial and temporal distribution of ENERGY CONSUMPTION in CITIES is critical to facilitate the identification of potential ENERGY SAVING opportunities and planning of new renewable and integrated DISTRICT ENERGY systems. Previous work analyzing URBAN BUILDING ENERGY USAGE has been largely limited to either modeling of individual BUILDINGS at granular temporal scales (i.e., hour…			Yes	Confirmed	building-level			Computing in civil engineering 2019: smart cities, sustainability, and resilience	B	Proceedings Paper	0	Computer Science, Interdisciplinary Applications; Engineering, Civil	Roth, J; Bailey, A; Choudhary, S; Jain, RK	[Roth, Jonathan; Jain, Rishee K.] Stanford Univ, Dept Civil & Environm Engn, Urban Informat Lab, 473 Via Ortega, Stanford, CA 94305 USA; [Bailey, Aimee; Choudhary, Sonika] EDF Innovat Lab, 4300 El Camino, Los Altos, CA 94109 USA		New York City	USA
	2019	Short-term heat load forecasting in DISTRICT HEATING systems USING artificial NEURAL NETWORKS	With the advent of sUSTAINABLE ENERGY systems based on renewable ENERGY sources (RES) and the development of a new generation of DISTRICT HEATING systems (4GDH), it has become imperative for cogeneration and RES plant operators, as well as DISTRICT HEATING (DH) operators, to apply new tools that lead to improvements in production planning, ENERGY EFFICIENCY, and at the same time, REDUCE costs of …		DEMAND; machine	Yes	Confirmed	district heating and cooling			International conference on the sustainable energy and environmental development	S	Proceedings Paper	0	Construction & Building Technology; Green & Sustainable Science & Technology; Energy & Fuels; Engineering, Environmental	Benalcazar, P; Kaminski, J	[Benalcazar, P.; Kaminski, J.] Polish Acad Sci, Mineral & Energy Econ Res Inst, Dept Policy & Strateg Res, Div Energy Econ, Krakow, Poland	10.1088/1755-1315/214/1/012023
	2019	SUPPORT VECTOR REGRESSION for predicting BUILDING ENERGY CONSUMPTION in southern China	It is increasingly significant to predict BUILDING ENERGY CONSUMPTION in ENERGY-SAVING decision making. This paper presents the method of support vector regress (SVR) to forecast BUILDING ENERGY CONSUMPTION in southern China. To improve the reliability of SVR in BUILDING ENERGY CONSUMPTION prediction, multiple parameters including weather data such as yearly mean outdoor drybulb temperature, rela…	BUILDING ENERGY CONSUMPTION; SUPPORT VECTOR REGRESSION; Weather data; Economic factor; Cross validation		Yes	Confirmed	building-level			Innovative solutions for energy transitions	S	Proceedings Paper	0	Energy & Fuels	Ma, ZT; Ye, CT; Ma, WB	[Ma, Zhitong; Ye, Cantao; Ma, Weibin] Chinese Acad Sci, Guangzhou Inst Energy Convers, Guangzhou 510640, Guangdong, Peoples R China; [Ma, Zhitong; Ye, Cantao; Ma, Weibin] CAS Key Lab Renewable Energy, Guangzhou 510640, Guangdong, Peoples R China; [Ma, Zhitong; Ye, Cantao; Ma, Weibin] Guangdong Prov Key Lab New & Renewable Energy Res, Guangzhou 510640, Guangdong, Peoples R China; [Ma, Zhitong] Uni…	10.1016/j.egypro.2019.01.931	Guangdong	China
	2019	Drift-Aware Methodology for Anomaly Detection in Smart Grid	ENERGY EFFICIENCY and sUSTAINABILITY are important factors to address in the context of smart CITIES. In this sense, smart metering and nonintrUSIVE load monitoring play a crucial role in fighting ENERGY thefts and for optimizing the ENERGY CONSUMPTION of the HOME, BUILDING, CITY, and so forth. The estimated number of smart meters will exceed 800 million by 2020. By providing near real-time data …	Anomaly detection; concept drift; MACHINE LEARNING; smart grid; time series analysis	nontechnical loss; neural-networks; ENERGY theft	Yes	Confirmed	building-level	appliance efficiency	operational efficiency	Ieee access	J	Article	2	Computer Science, Information Systems; Engineering, Electrical & Electronic; Telecommunications	Fenza, G; Gallo, M; Loia, V	[Fenza, Giuseppe; Gallo, Mariacristina; Loia, Vincenzo] Univ Salerno, Dipartimento Sci Aziendali Management & Innovat S, I-84084 Fisciano, Italy	10.1109/ACCESS.2019.2891315
	2019	Grading BUILDINGS on ENERGY performance USING CITY benchmarking data	As the effects of anthropogenic CLIMATE change become more pronounced, local and federal governments are turning TOWARDS more aggressive POLICIES to REDUCE ENERGY USE in existing BUILDINGS, a major global contributor of carbon emissions. Recently, several CITIES have enacted laws mandating owners of large BUILDINGS to publicly display an ENERGY EFFICIENCY rating for their properties. While such t…	BUILDING ENERGY performance; CITY-specific ENERGY benchmarking; ENERGY EFFICIENCY labeling; MACHINE LEARNING; ENERGY disclosure data; XGBoost	artificial neural-network; CONSUMPTION; prediction; EFFICIENCY; behavior; prices; models; disclosure; ratings; gap	Yes	Confirmed	building-level			Applied energy	J	Article	8	Energy & Fuels; Engineering, Chemical	Papadopoulos, S; Kontokosta, CE	[Kontokosta, Constantine E.] NYU, Dept Civil & Urban Engn, 370 Jay St,12th Floor, Brooklyn, NY 11201 USA; NYU, Ctr Urban Sci & Progress, 370 Jay St,12th Floor, Brooklyn, NY 11201 USA	10.1016/j.apenergy.2018.10.053	New York City	USA
	2018	Data-driven heating and cooling load predictions for non-RESIDENTIAL BUILDINGS based on SUPPORT VECTOR MACHINE regression and NARX RECURRENT NEURAL NETWORK: A comparative study on DISTRICT scale	Predicting BUILDING ENERGY CONSUMPTION is essential for planning and managing ENERGY systems. In recent times, numerous studies focus on load forecasting models dealing with a wide range of different methods. In addition to Artificial NEURAL NETWORKS (ANN), especially SUPPORT VECTOR MACHINES (SVM) have been studied. Various research work showed the success and superiority of ANN and SVM for load …	DISTRICT HEATING and cooling; URBAN ENERGY analysis; Load forecasting; SUPPORT VECTOR MACHINE regression; NARX RECURRENT NEURAL NETWORK	ENERGY-CONSUMPTION; outlier detection; model; system	Yes	Confirmed	district heating and cooling	CO2 emission/energy consumption prediction		Energy	J	Article	13	Thermodynamics; Energy & Fuels	Koschwitz, D; Frisch, J; van Treeck, C	[Koschwitz, D.; Frisch, J.; van Treeck, C.] Rhein Westfal TH Aachen, Inst Energy Efficiency & Sustainable Bldg E3D, D-52074 Aachen, Germany	10.1016/j.energy.2018.09.068	Stuttgart	Germany
	2018	ENERGY USE and SAVING in RESIDENTIAL sector and occupant behavior: A case study in Athens	In Greece, ENERGY USE in the RESIDENTIAL sector corresponds to 24.4% of the total ENERGY USE in 2014, showing an increase of 13.8% in the period 1995-2014. Although the technical characteristics of a BUILDING have a significant impact on RESIDENTIAL ENERGY USE, the behavior of the occupant is also crucial. Our aim is to investigate the interrelationships between the ENERGY USE behavior of occupan…	ENERGY USE; ENERGY SAVING; RESIDENTIAL sector; ENERGY behavioral types; PRINCIPAL COMPONENT ANALYSIS; Athens	CONSUMPTION; model; HOUSEHOLDS; POLICY	Yes	Confirmed	consumer behavior			Energy and buildings	J	Article	5	Construction & Building Technology; Energy & Fuels; Engineering, Civil	Vogiatzi, C; Gemenetzi, G; Massou, L; Poulopoulos, S; Papaefthimiou, S; Zervas, E	[Vogiatzi, Chrysa; Gemenetzi, Georgia; Massou, Lina; Papaefthimiou, Spiros; Zervas, Efthimios] Hellen Open Univ, Sch Sci & Technol, Lab Technol & Policy Energy & Environm, Parodos Aristotelous 18, Patras 26335, Greece; [Poulopoulos, Stavros] Nazarbayev Univ, Sch Engn, Dept Chem Engn, Astana, Kazakhstan; [Papaefthimiou, Spiros] Tech Univ Crete, Sch Prod Engn & Management, Khania, Greece	10.1016/j.enbuild.2018.09.039	Athens	Greece
	2018	Modeling of water USAGE by means of ARFIMA-GARCH processes	This paper addresses an important problem of modeling and prediction of phenomena with antipersistent behavior and variance changing in time. As a proper stochastic model we propose an autoregressive frACTIONALLY integrated moving average (ARFIMA) process with generalized autoregressive conditional heteroskedastiCITY (GARCH) noise. First, we introduce a simple identification and validation algori…	ARFIMA model; GARCH model; Long-range dependence; Water USAGE	time-series models; artificial neural-networks; long-range dependence; conditional heteroscedastiCITY; DEMAND; memory; persistence; prediction; inflation; inference	Yes	Confirmed	consumer behavior	operational efficiency		Physica a-statistical mechanics and its applications	J	Article	2	Physics, Multidisciplinary	Gajda, J; Bartnicki, G; Burnecki, K	[Gajda, Janusz; Burnecki, Krzysztof] Wroclaw Univ Sci & Technol, Hugo Steinhaus Ctr, Fac Pure & Appl Math, Wyspianskiego 27, PL-50370 Wroclaw, Poland; [Bartnicki, Grzegorz] Wroclaw Univ Sci & Technol, Fac Environm Engn, Wyspianskiego 27, PL-50370 Wroclaw, Poland	10.1016/j.physa.2018.08.134
	2018	A Two-Step Methodology for Free Rider MITIGATION with an Improved SETTLEMENT Algorithm: Regression in CBL Estimation and New Incentive Payment Rule in RESIDENTIAL DEMAND Response	Recent DEMAND response (DR) research efforts have focUSED on REDUCING the peak DEMAND, and thereby electriCITY prices. Load REDUCTIONS from DR programs can be viewed as equivalent electriCITY generation by conventional means. Thus, utility companies mUST pay incentives to cUSTOMERS who REDUCE their DEMAND accordingly. However, many key variables intrinsic to RESIDENTIAL cUSTOMERS are significantl…	DEMAND response; peak-time rebate; incentive payment rule; free rider; cUSTOMER baseline load; baseline estimation; regression	SUPPORT VECTOR MACHINES; load	Yes	Confirmed	demand response	consumer behavior		Energies	J	Article	0	Energy & Fuels	Lee, E; Jang, D; Kim, J	[Lee, Eunjung; Kim, Jinho] Gwangju Inst Sci & Technol, Sch Integrated Technol, 123 Cheomdangwagi Ro, Gwangju 61005, South Korea; [Jang, Dongsik] Korea Elect Power Res Inst, 105 Munji Ro, Daejeon 34056, South Korea	10.3390/en11123417		Korea
	2018	USER's Perspective on HOME ENERGY Management Systems	A HOME ENERGY Management System (HEMS) has no direct and immediate ENERGY-SAVING effect. It gives insight into the resident's behaviour regarding ENERGY USE. When this is linked to the appropriate feedback, the resident is in a position to change his or her behaviour. This should result in REDUCED gas and/or electriCITY CONSUMPTION. The aim of our study is to contribute to the effective USE of HE…	ENERGY CONSUMPTION; ENERGY USE; HOME ENERGY management systems; HOME owners; target group segmentation	feedback	Yes	Confirmed	consumer behavior			Environments	J	Article	0	Environmental Sciences	Straub, A; Volmer, E	[Straub, Ad] Delft Univ Technol, Fac Architecture & Built Environm, Julianalaan 134, NL-2628 BL Delft, Netherlands; [Volmer, Ellard] Delft Univ Technol, Fac Technol Policy & Management, Jaffalaan 5, NL-2628 BX Delft, Netherlands	10.3390/environments5120126	Rotterdam	Netherlands
	2018	Thermo-economic analysis and multi-objective optimization of micro-CHP Stirling system for different CLIMATES of Iran	Micro-CHP systems are designed to REDUCE ENERGY CONSUMPTION in the present era. In this study, micro-CHP systems with a solar-powered Stirling engine are designed for USE in similar BUILDINGS in three different CLIMATES of Iran. These solar systems are highly dependent on weather conditions in different CITIES. Modeling and optimizing to REDUCE costs, the economic dimension of the system, increas…	micro-CHP; ENERGY SAVING; Stirling engine; optimization; thermo-economic	time thermodynamic analysis; maxwell-boltzmann gas; multi objective optimization; heat engine; thermal EFFICIENCY; regenerative losses; neural-networks; brayton cycle; solar-ENERGY; output power	Yes	Confirmed	district heating and cooling			International journal of low-carbon technologies	J	Article	1	Thermodynamics; Energy & Fuels	Khoshbazan, M; Ahmadi, MH; Ming, TZ; Arjmand, JT; Rahimzadeh, M	[Khoshbazan, Maryam] Saveh Univ, Energy Higher Educ Inst, Dept Energy Engn, Saveh 3917767746, Iran; [Ahmadi, Mohammad Hossein] Shahrood Univ Technol, Fac Mech Engn, Shahrood 3619995161, Iran; [Ming, Tingzhen] Wuhan Univ Technol, Dept Civil Engn & Architecture, Wuhan 430070, Hubei, Peoples R China; [Arjmand, Jamal Tabe] Shahrood Univ Technol, Dept Architectural & Urbanism Engn, Shahrood 3619995161…	10.1093/ijlct/cty050	Tehran, Mashhad, Kerman	Iran
	2018	Enhancing ENERGY EFFICIENCY in the RESIDENTIAL sector with smart meter data analytics	Tailored ENERGY EFFICIENCY campaigns that make USE of HOUSEHOLD-specific information can trigger substantial ENERGY SAVINGS in the RESIDENTIAL sector. The information required for such campaigns, however, is often missing. We show that utility companies can extract that information from smart meter data USING MACHINE LEARNING. We derive 133 features from smart meter and weather data and USE the R…	Green information systems; Decision support systems; Data analytics; ENERGY EFFICIENCY; SUSTAINABILITY; Classification	information-systems; classification; CONSUMPTION; feedback; behavior	Yes	Confirmed	consumer behavior			Electronic markets	J	Article	3	Business; Management	Hopf, K; Sodenkamp, M; Staake, T	[Hopf, Konstantin; Sodenkamp, Mariya; Staake, Thorsten] Univ Bamberg, Informat Syst & Energy Efficient Syst, Kapuzinerstr 16, D-96047 Bamberg, Germany; [Staake, Thorsten] Swiss Fed Inst Technol, Dept Management Technol & Econ, Weinbergstr 56-58, CH-8092 Zurich, Switzerland	10.1007/s12525-018-0290-9
	2018	ENERGY SUSTAINABILITY in Smart CITIES: ARTIFICIAL INTELLIGENCE, Smart Monitoring, and Optimization of ENERGY CONSUMPTION	ENERGY sUSTAINABILITY is one of the key questions that drive the debate on CITIES' and URBAN areas development. In parallel, ARTIFICIAL INTELLIGENCE and cognitive computing have emerged as catalysts in the process aimed at designing and optimizing smart services' supply and utilization in URBAN space. The latter are paramount in the domain of ENERGY provision and CONSUMPTION. This paper offers an…	ARTIFICIAL INTELLIGENCE; DEMAND response; ENERGY; POLICY making; genetic algorithm; multiple kernel learning; non-intrUSIVE load monitoring; smart grid; smart metering; SUPPORT VECTOR MACHINE; smart CITIES; smart villages	load disaggregation; electriCITY market; transactive ENERGY; HOME-microgrids; framework; power; management	Yes	Confirmed	demand response			Energies	J	Article	13	Energy & Fuels	Chui, KT; Lytras, MD; Visvizi, A	[Chui, Kwok Tai] City Univ Hong Kong, Dept Elect Engn, Hong Kong, Hong Kong, Peoples R China; [Lytras, Miltiadis D.; Visvizi, Anna] Amer Coll Greece, Deree Coll, Sch Business & Econ, Gravias 6, Aghia Paraskevi 15342, Greece; [Lytras, Miltiadis D.] Effat Univ, Effat Coll Engn, POB 34689, Jeddah 21478, Saudi Arabia; [Visvizi, Anna] Effat Univ, Effat Coll Business, POB 34689, Jeddah 21478, Saudi Ara…	10.3390/en11112869
	2018	Development of DEMAND Response ENERGY Management Optimization at BUILDING and DISTRICT Levels USING Genetic Algorithm and Artificial NEURAL NETWORK Modelling Power Predictions	DEMAND Response (DR) is a fundamental aspect of the smart grid concept, as it refers to the necessary open and transparent market framework linking ENERGY costs to the actual grid operations. DR allows consumers to directly or indirectly participate in the markets where ENERGY is being exchanged. One of the main challenges for engaging in DR is associated with the initial assessment of the potent…	DEMAND response; artificial NEURAL NETWORK; power predictions; ENERGY management; genetic algorithm; optimisation; microgrid; smart grid	smart grids; systems; microgrids; indUSTRIAL; EFFICIENCY; design; USER	Yes	Confirmed	demand response	building-level		Energies	J	Article	7	Energy & Fuels	Kampelis, N; Tsekeri, E; Kolokotsa, D; Kalaitzakis, K; Isidori, D; Cristalli, C	[Kampelis, Nikos; Tsekeri, Elisavet; Kolokotsa, Dionysia] Tech Univ Crete, Environm Engn Sch, Built Environm Res Lab, Energy Management, Tech Univ Campus, GR-73100 Kounoupidiana, Chania, Greece; [Kalaitzakis, Kostas] Tech Univ Crete, Elect Circuits & Renewable Energy Sources Lab, GR-73100 Khania, Greece; [Isidori, Daniela; Cristalli, Cristina] AEA Srl, Res Innovat, Via Fiume 16, IT-60030 Angeli D…	10.3390/en11113012	Angeli di Rosora	Italy
	2018	Social and Infrastructural Conditioning of Lowering ENERGY Costs and Improving the ENERGY EFFICIENCY of BUILDINGS in the Context of the Local ENERGY POLICY	The main problem in creating successful EFFICIENCY improvement POLICIES is adjUSTING objectives to local development programs, dependent on public awareness. This article attempts to find a framework for the costs of changing ENERGY POLICIES USING NEURAL NETWORKS to identify the social-infrastructure conditions. An analysis model is presented of social-infrastructure conditions of ENERGY costs RE…	local ENERGY POLICY; ENERGY EFFICIENCY of BUILDINGS; NEURAL NETWORK; social-infrastructural correlation	artificial neural-network; FUEL poverty; multiobjective optimization; retrofit scenarios; model; performance; CONSUMPTION	Yes	Confirmed	Multi-stakeholder planning process			Energies	J	Article	5	Energy & Fuels	Mrowczynska, M; Skiba, M; Bazan-Krzywoszanska, A; Bazun, D; Kwiatkowski, M	[Mrowczynska, Maria; Skiba, Marta; Bazan-Krzywoszanska, Anna] Univ Zielona Gora, Fac Civil Engn, Architecture & Environm Engn, Licealna 9, PL-65417 Zielona Gora, Poland; [Bazun, Dorota; Kwiatkowski, Mariusz] Univ Zielona Gora, Fac Educ, Psychol & Sociol, Licealna 9, PL-65417 Zielona Gora, Poland	10.3390/en11092302	Zielona Góra	Poland
	2018	Identification of representative BUILDINGS and BUILDING groups in URBAN datasets USING a novel pre-processing, classification, clUSTERING and predictive modelling approach	The formulation of ENERGY POLICIES for URBAN BUILDING stock frequently requires the evaluation of the ENERGY USE of large numbers of BUILDINGS. When URBAN ENERGY modelling is utilised as part of this process, the identification of BUILDING groups and associated representative BUILDINGS can play a critical role. This paper outlines a novel methodology for identifying BUILDING groups and associated…	BUILDING grouping; Representative BUILDINGS; Predictive classification; URBAN ENERGY modelling; BUILDING clUSTERS; ClUSTERING	ENERGY-CONSUMPTION; big data; stock; performance; CITY; patterns; scale; conservation; potentials; algorithms	Yes	Confirmed	Data provision/imputation			Building and environment	J	Article	12	Construction & Building Technology; Engineering, Environmental; Engineering, Civil	Tardioli, G; Kerrigan, R; Oates, M; O'Donnell, J; Finn, DP	[Tardioli, Giovanni; Kerrigan, Ruth; Oates, Mike] Integrated Environm Solut Ltd, Casdeforbes House,Castleforbes Rd, Dublin D01 A8N0, Ireland; [Tardioli, Giovanni; O'Donnell, James; Finn, Donal P.] UCD, Sch Mech & Mat Engn, Dublin 4, Ireland	10.1016/j.buildenv.2018.05.035	Geneva	Switzerland
	2018	Artificial NEURAL NETWORK-Based Decision Support System for Development of an ENERGY-Efficient BUILT ENVIRONMENT	Implementing ENERGY-efficient solutions in a BUILT ENVIRONMENT is important for reaching international ENERGY REDUCTION targets. For advanced ENERGY EFFICIENCY-related solutions, computer-based decision support systems are proposed and rapidly USED in a variety of spheres relevant to a BUILT ENVIRONMENT. Present research proposes a novel artificial NEURAL NETWORK-based decision support system for…	ENERGY-EFFICIENCY; BUILT ENVIRONMENT; solutions; artificial NEURAL NETWORKS; decision support system; quantitative and qualitative analysis	performance; simulation; design	Yes	Confirmed	new buildings			Energies	J	Article	3	Energy & Fuels	Kaklauskas, A; Dzemyda, G; Tupenaite, L; Voitau, I; Kurasova, O; Naimaviciene, J; Rassokha, Y; Kanapeckiene, L	[Kaklauskas, Arturas; Tupenaite, Laura; Naimaviciene, Jurga; Kanapeckiene, Loreta] Vilnius Gediminas Tech Univ, Fac Civil Engn, Dept Construct Management & Real Estate, Sauletekio Al 11, LT-10223 Vilnius, Lithuania; [Dzemyda, Gintautas; Kurasova, Olga] Vilnius Univ, Inst Math & Informat, Akademijos Str 4, LT-08663 Vilnius, Lithuania; [Voitau, Ihar; Rassokha, Yauheni] Belarusian State Technol Univ…	10.3390/en11081994
	2018	A tool for verifying ENERGY performance certificates and improving the knowledge of the RESIDENTIAL sector: A case study of the Autonomous Community of Aragon (Spain)	The analysis of ENERGY performance certificates is one method of better understanding the current constructive reality of the BUILDING stock and of generating knowledge that is applicable to ENERGY planning in the RESIDENTIAL sector. The objective of this study is to develop a correction algorithm for ENERGY performance certificates to assess the RESIDENTIAL BUILDING stock of a country by region.…	ENERGY performance certificates (EPCs); RESIDENTIAL sector; Primary ENERGY CONSUMPTION; CO2 emissions	BUILDING stock; MUNICIPAL level; neural-networks; la rioja; indicators; impact; EFFICIENCY; scenarios; DWELLINGS; model	Yes	Confirmed	retrofit envelope			Sustainable cities and society	J	Article	7	Construction & Building Technology; Green & Sustainable Science & Technology; Energy & Fuels	Las-Heras-Casas, J; Lopez-Ochoa, LM; Lopez-Gonzalez, LM; Paredes-Sanchez, JP	[Las-Heras-Casas, Jesus; Lopez-Ochoa, Luis M.; Lopez-Gonzalez, Luis M.] Univ La Rioja, Dept Mech Engn, TENECO Res Grp, Calle San Jose de Calasanz 31, Logrono 26004, La Rioja, Spain; [Paredes-Sanchez, Jose P.] Univ Oviedo, Sch Min Energy & Mat Engn Oviedo, Dept Energy, Calle Independencia 13, Oviedo 33004, Principado De A, Spain	10.1016/j.scs.2018.05.016	Aragón	Spain
	2018	Pattern recognition in BUILDING ENERGY performance over time USING ENERGY benchmarking data	In recent years, many CITIES have adopted ENERGY disclosure POLICIES to better understand how ENERGY is consumed in the URBAN BUILT ENVIRONMENT and how ENERGY USE and carbon emissions can be REDUCED. The diffUSION of such POLICIES has generated large-scale streams of BUILDING ENERGY data, creating new opportunities to develop the fundamental science of URBAN ENERGY dynamics. Nevertheless, there i…	ENERGY benchmarking; ENERGY disclosure; Time series clUSTERING; MACHINE LEARNING; BUILDING ENERGY performance; New York CITY	new-york-CITY; CONSUMPTION; series; information; prediction; EFFICIENCY; disclosure	Yes	Confirmed	building-level			Applied energy	J	Article	11	Energy & Fuels; Engineering, Chemical	Papadopoulos, S; Bonczak, B; Kontokosta, CE	[Kontokosta, Constantine E.] NYU, Dept Civil & Urban Engn, 370 Jay St,12th Floor, Brooklyn, NY 11201 USA; NYU, Ctr Urban Sci & Progress, 370 Jay St,12th Floor, Brooklyn, NY 11201 USA	10.1016/j.apenergy.2018.03.079	New York City	USA
	2018	Developing URBAN RESIDENTIAL reference BUILDINGS USING clUSTERING analysis of satellite images	BUILT-UP areas tend to comprise a variety of BUILDINGS with diverse and complex shapes, functions and construction characteristics. This variety is the source of significant challenges when calculating BUILDING ENERGY USE at the BUILDING stock level. Moreover, the process of developing stock models USUALLY requires large amounts of data that are frequently scarce, nonexistent or at least not publ…	RESIDENTIAL BUILDING benchmark; BUILDING shape; ClUSTER analysis; BUILT-UP area; Bottom-up approach	ENERGY-CONSUMPTION; model generation; laser scanner; RANDOM FOREST; google earth; aspect ratio; stock model; hot summer; CITY-scale; performance	Yes	Confirmed	Data provision/imputation			Energy and buildings	J	Article	4	Construction & Building Technology; Energy & Fuels; Engineering, Civil	Li, XY; Yao, RM; Liu, M; Costanzo, V; Yu, W; Wang, WB; Short, A; Li, BZ	[Li, Xinyi; Yao, Runming; Liu, Meng; Yu, Wei; Li, Baizhan] Chongqing Univ, Minist Educ, Joint Int Lab Green Bldg & Built Environm, Chongqing 400045, Peoples R China; [Li, Xinyi; Yao, Runming; Costanzo, Vincenzo; Wang, Wenbo] Univ Reading, Sch Built Environm, Reading RG6 6DF, Berks, England; [Short, Alan] Univ Cambridge, Dept Architecture, Cambridge CB2 1PX, England	10.1016/j.enbuild.2018.03.064	Chongqing	China
	2018	Passive design optimization of newly-built RESIDENTIAL BUILDINGS in Shanghai for improving indoor thermal comfort while REDUCING BUILDING ENERGY DEMAND	The objective of this paper is to optimize the passive design of newly-built RESIDENTIAL BUILDINGS in hot summer and cold winter region of China for improving indoor thermal comfort while REDUCING BUILDING ENERGY DEMAND. In this respect, this paper investigates the performance of a representative apartment BUILDING in the CITY of Shanghai and evaluates the optimum solutions by USING a developed o…	Passive design; RESIDENTIAL BUILDINGS; Multi-objective optimization; Artificial NEURAL NETWORK; Genetic algorithm; Thermal comfort; ENERGY DEMAND	simulation-based optimization; artificial neural-network; vector machine approach; multiobjective optimization; genetic algorithm; CLIMATE analysis; hot summer; performance; EFFICIENCY; system	Yes	Confirmed	new buildings			Energy and buildings	J	Review	26	Construction & Building Technology; Energy & Fuels; Engineering, Civil	Gou, SQ; Nik, VM; Scartezzini, JL; Zhao, Q; Li, ZR	[Gou, Shaoqing; Li, Zhengrong] Tongji Univ, Sch Mech Engn, HVAC & Gas Inst, Shanghai 200092, Peoples R China; [Nik, Vahid M.] Lund Univ, Div Bldg Phys, Dept Bldg & Environm Technol, Lund, Sweden; [Nik, Vahid M.] Chalmers Univ Technol, Dept Architecture & Civil Engn, Div Bldg Technol, Gothenburg, Sweden; [Scartezzini, Jean-Louis] Ecole Polytech Fed Lausanne, Solar Energy & Bldg Phys Lab LESO PB, C…	10.1016/j.enbuild.2017.09.095	Shanghai	China
	2018	A Dynamic Model for Indoor Temperature Prediction in BUILDINGS	A novel dynamic model for the temperature inside BUILDINGS is presented, aiming to improve ENERGY EFFICIENCY by providing predictive information on the heat DEMAND. To analyse the performance and generalizability of the modelling approach, real measurement data was gathered from five different types of BUILDINGS. Easily available data from various sources was utilized. The chosen model structure …	thermal modeling; indoor temperature prediction; cross-validation; parameter estimation; grey-box model	thermal-ENERGY storage; gray-box model; neural-network; commercial BUILDINGS; RESIDENTIAL BUILDINGS; parameter-estimation; heating-systems; part i; CONSUMPTION; mass	Yes	Confirmed	new buildings			Energies	J	Article	5	Energy & Fuels	Hietaharju, P; Ruusunen, M; Leiviska, K	[Hietaharju, Petri; Ruusunen, Mika; Leiviska, Kauko] Univ Oulu, Control Engn, POB 4300, FI-90014 Oulu, Finland	10.3390/en11061477
	2018	Modeling occupancy distribution in large spaces with multi-feature classification algorithm	Occupancy-based control Occupancy information enables robUST and flexible control of heating, ventilation, and airconditioning (HVAC) systems in BUILDINGS. In large spaces, multiple HVAC terminals are typically installed to provide cooperative services for different thermal zones, and the occupancy information determines the cooperation among terminals. However, a person count at room-level does …	HVAC loads; Multi-feature classification algorithm; Occupancy distribution; ENERGY EFFICIENCY; Occupancy-based control	DEMAND-controlled ventilation; BUILDING ENERGY-CONSUMPTION; fingerprinting localization; network infrastructure; commercial BUILDINGS; simulation-model; CLIMATE control; information; behavior; SAVINGS	Yes	Confirmed	operational efficiency			Building and environment	J	Article	9	Construction & Building Technology; Engineering, Environmental; Engineering, Civil	Wang, W; Chen, JY; Hong, TZ	[Wang, Wei; Chen, Jiayu] City Univ Hong Kong, Dept Architecture & Civil Engn, Y6621,AC1,Tat Chee Ave, Kowloon, Hong Kong, Peoples R China; [Wang, Wei; Hong, Tianzhen] Lawrence Berkeley Natl Lab, Bldg Technol & Urban Syst Div, 1 Cyclotron Rd, Berkeley, CA 94720 USA	10.1016/j.buildenv.2018.04.002	Oulu, Jyväskylä	Finland
	2018	ClUSTERING-based analysis for RESIDENTIAL DISTRICT HEATING data	The wide USE of smart meters enables collection of a large amount of fine-granular time series, which can be USED to improve the understanding of CONSUMPTION behavior and USED for CONSUMPTION optimization. This paper presents a clUSTERING-based knowledge discovery in databases method to analyze RESIDENTIAL heating CONSUMPTION data and evaluate information included in national BUILDING databases. …	ClUSTERING; Load pattern; Load profiling; Load transition; Variability	load profiles; CONSUMPTION; machine	Yes	Confirmed	building-level	district heating and cooling		Energy conversion and management	J	Article	16	Thermodynamics; Energy & Fuels; Mechanics	Gianniou, P; Liu, XF; Heller, A; Nielsen, PS; Rode, C	[Gianniou, Panagiota; Liu, Xiufeng; Heller, Alfred; Nielsen, Per Sieverts; Rode, Carsten] Tech Univ Denmark, Copenhagen, Denmark	10.1016/j.enconman.2018.03.015	Chongqing	China
	2018	Developing a Mixed NEURAL NETWORK Approach to Forecast the RESIDENTIAL ElectriCITY CONSUMPTION Based on Sensor Recorded Data	In this paper, we report a study having as a main goal the obtaining of a method that can provide an accurate forecast of the RESIDENTIAL electriCITY CONSUMPTION, refining it up to the appliance level, USING sensor recorded data, for RESIDENTIAL smart HOMES complexes that USE renewable ENERGY sources as a part of their consumed electriCITY, overcoming the limitations of not having available histo…	smart HOMES; forecasting solutions; ENERGY management; HOME appliances and devices monitored by sensors; RESIDENTIAL electriCITY CONSUMPTION; Internet of Things (IoT) cloud solution; artificial NEURAL NETWORKS (ANNs); non-linear autoregressive with exogenous inputs network (NARX); function fitting NEURAL NETWORK (FITNET)	smart CITIES; system; load; prediction; algorithm; profiles	Yes	Confirmed	appliance efficiency			Sensors	J	Article	5	Chemistry, Analytical; Engineering, Electrical & Electronic; Instruments & Instrumentation	Oprea, SV; Pirjan, A; Carutasu, G; Petrosanu, DM; Bara, A; Stanica, JL; Coculescu, C	[Oprea, Simona-Vasilica; Bara, Adela] Bucharest Acad Econ Studies, Dept Econ Informat & Cybernet, Romana Sq 6, Bucharest 010374, Romania; [Pirjan, Alexandru; Carutasu, George; Petrosanu, Dana-Mihaela; Stanica, Justina-Lavinia; Coculescu, Cristina] Romanian Amer Univ, Dept Informat Stat & Math, Expozitiei 1B, Bucharest 012101, Romania; [Petrosanu, Dana-Mihaela] Univ Politehn Bucuresti, Dept Math I…	10.3390/s18051443
	2018	Improvement of ENERGY performance metrics for the retrofit of the BUILT ENVIRONMENT. Adaptation to CLIMATE change and MITIGATION of ENERGY poverty	ENERGY retrofit of existing BUILDINGS was highlighted as an efficient massive ACTION to decrease ENERGY CONSUMPTION and emissions of GREENHOUSE GASES. But, detecting the optimal retrofit strategies for groups of BUILDINGS is nowadays a highly complex problem. Their ENERGY CONSUMPTIONs are influenced by BUILDING related factors (CLIMATE, BUILDING envelope, BUILDING services and systems) and by USE…	ENERGY retrofit; ClUSTERING; PRINCIPAL COMPONENTS ANALYSIS; ENERGY poverty; CLIMATE change	multivariate-analysis; BUILDING sector; CONSUMPTION; impact; regression; patterns; behavior	Yes	Confirmed	retrofit envelope	building-level	building-level	Energy and buildings	J	Article	3	Construction & Building Technology; Energy & Fuels; Engineering, Civil	Filippin, C; Larsen, SF; Ricard, F	[Filippin, Celina; Ricard, Florencia] Consejo Nacl Invest Cient & Tecn, CC302, RA-6300 Santa Rosa, La Pampa, Argentina; [Larsen, Silvana Flores] Univ Nacl Salta, CONICET, Inst Invest Energia Convenc INENCO, Ave Bolivia 5150, RA-4400 Salta, Argentina	10.1016/j.enbuild.2017.12.050	La Pampa	Argentina
	2018	The re-optimization strategy of multi-layer hybrid BUILDING's cooling and heating load soft sensing technology research based on temperature interval and hierarchical modeling techniques	To avoid expanding existing fossil power plants, BUILDING the ENERGY performance management system is an effect method to cope with a high growth DEMAND of electriCITY in China's URBANIZATION process. The accuracy thermal load prediction is the first step to build an ENERGY performance management system which has important significance for ENERGY SAVING, decreasing air pollution and high-EFFICIEN…	ENERGY forecasting; Combined model; Hierarchical modeling; Temperature interval	artificial neural-network; commercial BUILDINGS; simulation program; ENERGY-CONSUMPTION; different CLIMATES; design; prediction; system; validation; regression	Yes	Confirmed	district heating and cooling	Modeling method contribution		Sustainable cities and society	J	Article	2	Construction & Building Technology; Green & Sustainable Science & Technology; Energy & Fuels	Liu, K; Liu, TZ; Jian, P; Lin, Y	[Liu, Kai; Liu, Ting-Zhang; Jian, Pan; Lin, Yue] Shanghai Univ, Coll Mechatron Engn & Automat, Dept Automat, Shanghai, Peoples R China; [Liu, Kai; Liu, Ting-Zhang; Jian, Pan; Lin, Yue] Shanghai Key Lab Power Stn Automat Technol, Shanghai, Peoples R China	10.1016/j.scs.2017.11.034	Shanghai	China
	2018	Big Data Analytics for Discovering ElectriCITY CONSUMPTION Patterns in Smart CITIES	New technologies such as sensor networks have been incorporated into the management of BUILDINGS for organizations and CITIES. Sensor networks have led to an exponential increase in the volume of data available in recent years, which can be USED to extract CONSUMPTION patterns for the purposes of ENERGY and monetary SAVINGS. For this reason, new approaches and strategies are needed to analyze inf…	big data; time series clUSTERING; patterns; smart CITIES	management; mapREDUCE	Yes		building-level	CO2 emission/energy consumption prediction		Energies	J	Article	20	Energy & Fuels	Perez-Chacon, R; Luna-Romera, JM; Troncoso, A; Martinez-Alvarez, F; Riquelme, JC	[Perez-Chacon, Ruben; Troncoso, Alicia; Martinez-Alvarez, Francisco] Univ Pablo de Olavide, Div Comp Sci, ES-41013 Seville, Spain; [Luna-Romera, Jose M.; Riquelme, Jose C.] Univ Seville, Div Comp Sci, ES-41012 Seville, Spain	10.3390/en11030683
	2018	Factors affecting ENERGY-SAVING behaviours and ENERGY EFFICIENCY investments in British HOUSEHOLDS	The objective of this paper is to identify the socio-demographic, DWELLING, and environmental factors that have the strongest influence on the daily ENERGY-SAVING behaviours, the adoption of ENERGY efficient appliances and the ENERGY efficient retrofit investments made by British HOUSEHOLDS. This study USES British HOUSEHOLD data from the "Survey of Public Attitudes and Behaviours TOWARDS the Env…	ENERGY behaviours; ENERGY EFFICIENCY; Appliances; Retrofit; ENERGY SAVING; British HOUSEHOLDS	pro-environmental behavior; conservation; attitudes; CONSUMPTION; barriers; gap; determinants; challenges; knowledge; economics	Yes		consumer behavior			Energy policy	J	Article	29	Economics; Energy & Fuels; Environmental Sciences; Environmental Studies	Trotta, G	[Trotta, Gianluca] Univ Vaasa, Fac Business Studies Econ & Business Law Econ, Dept Econ, Off Tervahovi D210,Wolffintie 34, Vaasa 65200, Finland	10.1016/j.enpol.2017.12.042		United Kingdom
	2018	Predicting electriCITY CONSUMPTION for commercial and RESIDENTIAL BUILDINGS USING deep RECURRENT NEURAL NETWORKS	This paper presents a RECURRENT NEURAL NETWORK model to make medium-to-long term predictions, i.e. time horizon of >= 1 week, of electriCITY CONSUMPTION profiles in commercial and RESIDENTIAL BUILDINGS at one-hour resolution. RESIDENTIAL and commercial BUILDINGS are responsible for a significant frACTION of the overall ENERGY CONSUMPTION in the U.S. With advances in sensors and smart technologies…	BUILDING ENERGY modeling; MACHINE LEARNING; RECURRENT NEURAL NETWORKS; DEEP LEARNING; Electric load prediction	of-the-art	Yes		building-level	CO2 emission/energy consumption prediction		Applied energy	J	Article	57	Energy & Fuels; Engineering, Chemical	Rahman, A; Srikumar, V; Smith, AD	[Rahman, Aowabin; Smith, Amanda D.] Univ Utah, Dept Mech Engn, Site Specif Energy Syst Lab, Salt Lake City, UT 84112 USA; [Srikumar, Vivek] Univ Utah, Sch Comp, Salt Lake City, UT 84112 USA	10.1016/j.apenergy.2017.12.051	Salt Lake City	USA
	2018	Modeling ENERGY-related CO2 emissions from office BUILDINGS USING general regression NEURAL NETWORK	Carbon dioxide (CO2) emissions from URBAN office BUILDINGS ENERGY USAGES (BEC) constitute a substantial component of anthropogenic GREENHOUSE GAS emission, and are set to rapidly increase with further URBANIZATION. Establishing a concise, accurate, and realistic model that can predict future emissions is challenging but essential for strategies to develop low carbon construction and sUSTAINABLE d…	Office BUILDING; ENERGY USAGE carbon emission; Model construction; General regression NEURAL NETWORK; Scenario analysis; Prediction	carbon emissions; RESIDENTIAL BUILDINGS; national level; us HOUSEHOLDS; china; performance; CONSUMPTION; surface; DEMAND; optimization	Yes		building-level	consumer behavior		Resources conservation and recycling	J	Article	16	Engineering, Environmental; Environmental Sciences	Ye, H; Ren, Q; Hu, XY; Lin, T; Shi, LY; Zhang, GQ; Li, XH	[Ye, Hong; Ren, Qun; Hu, Xinyue; Lin, Tao; Shi, Longyu; Zhang, Guoqin; Li, Xinhu] Chinese Acad Sci, Inst Urban Environm, Key Lab Urban Environm & Hlth, Xiamen 361021, Peoples R China; [Ye, Hong; Hu, Xinyue; Lin, Tao; Shi, Longyu; Zhang, Guoqin; Li, Xinhu] Xiamen Key Lab Urban Metab, Xiamen 361021, Peoples R China; [Ren, Qun] Xiamen Univ, Xiamen 361102, Peoples R China	10.1016/j.resconrec.2017.10.020		China
	2018	Estimation and optimisation of BUILDINGS' thermal load USING LiDAR data	With the growing URBANIZATION and environmental concerns over BUILDINGS' ENERGY CONSUMPTION and carbon footprint, the DEMAND for ENERGY-efficient BUILDING design is greater than ever. This paper addresses these concerns by presenting a novel method for estimating And optimising the thermal load (i.e. total ENERGY load for heating and cooling) of a BUILDING within a real environment, provided by h…	ENERGY EFFICIENCY; BUILDING design optimisation; ENERGY efficient BUILDING; Heating; Cooling; Thermal load; LiDAR	ENERGY performance; genetic-algorithm; solar-radiation; RESIDENTIAL BUILDINGS; envelope design; airborne lidar; neural-network; CITY models; comfort; surfaces	Yes		retrofit envelope			Building and environment	J	Article	4	Construction & Building Technology; Engineering, Environmental; Engineering, Civil	Bizjak, M; Zalik, B; Stumberger, G; Lukac, N	[Bizjak, Marko; Zalik, Borut; Stumberger, Gorazd; Lukac, Niko] Univ Maribor, Fac Elect Engn & Comp Sci, Koroska Cesta 46, SI-2000 Maribor, Slovenia	10.1016/j.buildenv.2017.11.016	Maribor	Slovenia
	2018	Model-free control of thermostatically controlled loads connected to a DISTRICT HEATING network	Optimal control of thermostatically controlled loads connected to a DISTRICT HEATING network is considered a sequential decision-making problem under uncertainty. The practicality of a direct model-based approach is compromised by two challenges, namely scalability due to the large dimensionality of the problem and the system identification required to identify an accurate model. To help in MITIG…	DISTRICT HEATING; Combined heat and power; REINFORCEMENT LEARNING; Thermostatically controlled loads	predictive control; stochastic-control; DEMAND response; reinforcement; management; systems; storage	Yes		district heating and cooling			Energy and buildings	J	Article	9	Construction & Building Technology; Energy & Fuels; Engineering, Civil	Claessens, BJ; Vanhoudt, D; Desmedt, J; Ruelens, F	[Claessens, Bert J.; Vanhoudt, D.; Desmedt, J.] Res Inst VITO, Energy Dept, B-2400 Mol, Belgium; [Ruelens, F.] Katholieke Univ Leuven, Dept Elect Engn, Kasteelpk Arenberg 10,Bus 2445, B-3001 Leuven, Belgium; [Claessens, Bert J.; Vanhoudt, D.; Desmedt, J.; Ruelens, F.] EnergyVille, Thor Pk 8310, B-3600 Genk, Belgium	10.1016/j.enbuild.2017.08.052
	2018	Assessing the implications of socioeconomic diversity for low carbon technology uptake in electrical distribution networks	Adequately accounting for interACTIONS between Low Carbon Technologies (LCTs) at the BUILDING level and the overarching ENERGY system means capturing the granularity associated with decentralised heat and power supply in RESIDENTIAL BUILDINGS. This paper combines DWELLING/HOUSEHOLD archetypes (DHAs) combined with a mixed integer linear program to generate optimal (minimum cost) technology configu…	Low voltage distribution network; Network upgrade; HOUSEHOLDS; RESIDENTIAL BUILDINGS; NEIGHBOURHOODS, socioeconomic factors; Low carbon technologies	ENERGY DEMAND; load profiles; optimization; transformer; impact	Yes		consumer behavior	fuel switch		Applied energy	J	Article	6	Energy & Fuels; Engineering, Chemical	McKenna, R; Djapic, P; Weinand, J; Fichtner, W; Strbac, G	[McKenna, R.; Weinand, J.; Fichtner, W.] Karlsruhe Inst Technol, Chair Energy Econ, Karlsruhe, Germany; [Djapic, P.; Strbac, G.] Imperial Coll London, Dept Elect & Elect Engn, Control & Power Grp, London, England	10.1016/j.apenergy.2017.07.089		United Kingdom
	2018	Regional difference of HOUSEHOLD electriCITY CONSUMPTION: An empirical study of Jiangsu, China	Severe environmental problems are resulted from the rapid growth of electriCITY CONSUMPTION in China, since thermal power plant occupies the predominant position in power generation and releases large amount of pollutants and GREENHOUSE GAS. ElectriCITY CONSUMPTION of RESIDENTIAL sector grows even faster than that of indUSTRIAL sector in recent years. RESIDENTIAL sector is increasingly believed t…	HOUSEHOLD electriCITY CONSUMPTION (HEC); Regional comparison; CONSUMPTION volatility; Pattern similarly; Temperature sensitivity	DEMAND-side management; ENERGY-CONSUMPTION; economic-growth; power indUSTRY; load profiles; EFFICIENCY; model; segmentation; regression; selection	Yes		consumer behavior			Journal of cleaner production	J	Article	4	Green & Sustainable Science & Technology; Engineering, Environmental; Environmental Sciences	Sun, L; Zhou, KL; Yang, SL	[Sun, Li; Zhou, Kaile; Yang, Shanlin] Hefei Univ Technol, Sch Management, Hefei 230009, Anhui, Peoples R China; [Zhou, Kaile; Yang, Shanlin] Minist Educ, Key Lab Proc Optimizat & Intelligent Decis Making, Hefei 230009, Anhui, Peoples R China	10.1016/j.jclepro.2017.10.123	Jiangsu	China
	2018	An Intelligent Knowledge-based ENERGY Retrofit Recommendation System for RESIDENTIAL BUILDINGS at an URBAN Scale	BUILDINGS play a significant role in driving the URBAN DEMAND and supply of ENERGY. Research conducted in the URBAN BUILDINGS sector indicates that there is a considerable potential to achieve significant REDUCTIONS in ENERGY CONSUMPTION and GREENHOUSE GAS emissions. These REDUCTIONS are possible through retrofitting existing BUILDINGS into more efficient and sUSTAINABLE BUILDINGS. BUILDING retro…			Yes		retrofit envelope	operational efficiency	appliance efficiency	2018 building performance analysis conference and simbuild	S	Proceedings Paper	0	Construction & Building Technology	Ali, U; Shamsi, MH; Hoare, C; Mangina, E; O'Donnell, J	[Ali, Usman; Shamsi, Mohammad Haris; Hoare, Cathal; O'Donnell, James] UCD, Energy Inst, Sch Mech & Mat Engn, Dublin, Ireland; [Mangina, Eleni] UCD, Sch Comp Sci & Informat, Dublin, Ireland
	2018	Applying SUPPORT VECTOR MACHINES to predict BUILDING ENERGY CONSUMPTION in China	It is increasingly significant to predict BUILDING ENERGY CONSUMPTION (BEC) in ENERGY-SAVING decision making. This paper presents the method of SUPPORT VECTOR MACHINES (SVM) to forecast BUILDING ENERGY CONSUMPTION in China. To improve the reliability of SVM in BUILDING ENERGY CONSUMPTION prediction, multiple parameters including weather data such as yearly mean outdoor dry-bulb temperature, relat…	SUPPORT VECTOR MACHINE; BUILDING ENERGY CONSUMPTION; Weather data; Economic factor; Cross validation; Grid search algorithm	regression	Yes		building-level			Cleaner energy for cleaner cities	S	Proceedings Paper	2	Energy & Fuels; Environmental Sciences	Ma, ZT; Ye, CT; Li, HS; Ma, WB	[Ma, Zhitong; Ye, Cantao; Li, Huashan; Ma, Weibin] Chinese Acad Sci, Guangzhou Inst Energy Convers, Guangzhou 510640, Guangdong, Peoples R China; [Ma, Zhitong; Ye, Cantao; Li, Huashan; Ma, Weibin] CAS Key Lab Renewable Energy, Guangzhou 510640, Guangdong, Peoples R China; [Ma, Zhitong; Ye, Cantao; Li, Huashan; Ma, Weibin] Guangdong Prov Key Lab New & Renewable Energy Res, Guangzhou 510640, Guangd…	10.1016/j.egypro.2018.09.245		China
	2018	DRUMS: DEMAND Response Management in a Smart CITY USING DEEP LEARNING and SVR	DEMAND response management in smart CITIES is one of the most challenging tasks to be performed due to the continuous changes in the load profile of the HOME USERS. The existing proposals in the literature fail to observe the hidden patterns in the load profile of these USERS. So, to fill these gaps, the concept of DEEP LEARNING has been USED in this paper for smart ENERGY management in a smart C…	Convolution NEURAL NETWORK; DEMAND response; Smart CITY; Smart HOMES; SUPPORT VECTOR REGRESSION	CONSUMPTION	Yes		demand response	CO2 emission/energy consumption prediction		2018 ieee global communications conference (globecom)	S	Proceedings Paper	0	Engineering, Electrical & Electronic; Telecommunications	Jindal, A; Aujla, GS; Kumar, N; Prodan, R; Obaidat, MS	[Jindal, Anish; Aujla, Gagangeet Singh; Kumar, Neeraj] Thapar Inst Engn & Technol, Comp Sci & Engn Dept, Patiala, Punjab, India; [Aujla, Gagangeet Singh] Chandigarh Univ, Comp Sci & Engn Dept, Mohali, Punjab, India; [Prodan, Radu] Univ Klagenfurt, Inst Informat Technol, Klagenfurt, Austria; [Obaidat, Mohammad S.] Univ Jordan, King Abdullah II Sch Informat Technol, Amman, Jordan	10.1109/GLOCOM.2018.8647926
	2018	Simulation of HOUSEHOLD electriCITY CONSUMPTION by USING functional data analysis	Obtaining patterns for electriCITY CONSUMPTION in a particular HOUSEHOLD is a key issue to simulate and dimension the electriCITY supply needed in an isolated HOUSE. The electriCITY CONSUMPTION profile (load curve) of a USER is a function that indicates the electrical CONSUMPTION in a DWELLING over a period of time, USUALLY one day. When this function is considered as a datum and several days are…	ElectriCITY; functional data analysis; regression; simulation	load curve; depth	Yes		building-level	consumer behavior		Journal of simulation	J	Article	1	Computer Science, Interdisciplinary Applications; Operations Research & Management Science	Mallor, F; Moler, JA; Urmeneta, H	[Mallor, Fermin; Moler, Jose A.; Urmeneta, Henar] Univ Publ Navarra, Dept Estadist & Invest Operat, Pamplona, Spain	10.1057/s41273-017-0052-2
	2018	ENERGY CONSUMPTION prediction in URBAN areas for the smart CITY ecosystem	It is nowadays a worldwide trend to implement the so-called digital power indUSTRY, which implies optimization of the ENERGY resources dissemination and USE, based on modern digital technologies and telecommunication systems. Control systems of this kind mUST take into account clearly inevident trends in changing ENERGY CONSUMPTION depending on the time of year, time of day, day of the week, etc.…	ENERGY CONSUMPTION forecasting; RECURRENT NEURAL NETWORK; data analysis; regression; smart CITY		Yes		building-level			Remote sensing technologies and applications in urban environments iii	S	Proceedings Paper	0	Environmental Sciences; Remote Sensing; Optics	Belyaev, AO; Boldyrev, AS; Gorbunova, EB; Sinutin, ES; Sinutin, SA	[Belyaev, A. O.; Boldyrev, A. S.; Gorbunova, E. B.; Sinutin, E. S.; Sinutin, S. A.] Southern Fed Univ, Inst Radio Engn Syst & Control, Engelsa Str 1, Taganrog, Russia	10.1117/12.2517153
	2018	SUPPORT VECTOR MACHINE FOR THE PREDICTION OF HEATING ENERGY USE	Prediction of a BUILDING ENERGY USE for heating is very important for adequate ENERGY planning. In this paper the daily DISTRICT HEATING USE of one university campus was predicted USING the SUPPORT VECTOR MACHINE model. SUPPORT VECTOR MACHINE is the ARTIFICIAL INTELLIGENCE method that has recently proved that it can achieve comparable, or even better prediction results than the much more USED art…	heating USE prediction; SUPPORT VECTOR MACHINE; ARTIFICIAL INTELLIGENCE models	artificial neural-network; parameters; ensemble; load	Yes		building-level			Thermal science	J	Article; Proceedings Paper	0	Thermodynamics	Sretenovic, AA; Jovanovic, RZ; Novakovic, VM; Nord, NM; Zivkovic, BD	[Sretenovic, Aleksandra A.; Jovanovic, Radisa Z.; Zivkovic, Branislav D.] Univ Belgrade, Fac Mech Engn, Belgrade, Serbia; [Novakovic, Vojislav M.; Nord, Natasa M.] Norwegian Univ Sci & Technol, Trondheim, Norway	10.2298/TSCI170526126S	Gloshaugen	Norway
	2018	COMPARISON OF REGRESSION MODEL AND ARTIFICIAL NEURAL NETWORK MODEL FOR ENERGY BENCHMARKING OF ACCOMMODATION BUILDINGS IN KANTO, JAPAN	ENERGY performance of RESIDENTIAL and non-RESIDENTIAL BUILDINGS is a vital topic becaUSE of fast URBANIZATION in the world. The accommodation BUILDINGS are considered as high ENERGY intensive comparing to other commercial BUILDING' categories. In addition, it has an important contribution in tourism indUSTRY. Therefore, variety of models and plans have been applied to REDUCE the ENERGY CONSUMPTIO…	artificial NEURAL NETWORK; benchmarking; DECC; ENERGY performance; regression	hotels; conservation; green	Yes		building-level			Energy and sustainability viii	S	Proceedings Paper	0	Green & Sustainable Science & Technology; Ecology; Environmental Sciences	Alkhalaf, H; Yan, WL	[Alkhalaf, Haitham; Yan, Wanglin] Keio Univ, Tokyo, Japan	10.2495/ESUS170071	Kanto	Japan
	2018	Implementation of a Smart Grid Communication System Compliant with IEEE 2030.5	ENERGY utilities are constantly under pressure to meet the growing and complicated ENERGY DEMANDS. The traditional ENERGY grid allows for one-way communication of ENERGY USAGE between cUSTOMERS and the utilities. This does not allow the utilities to have control or to suggest any changes in CONSUMPTION based on the ENERGY data they obtain. In this paper, we propose and implement an innovative two…	IEEE 2030.5 (Smart ENERGY Profile 2.0); IoT; Mesh Network; Smart Grid; OLSR; Two-Way Communication	routing protocols	Yes		Data provision/imputation			2018 ieee international conference on communications workshops (icc workshops)	S	Proceedings Paper	2	Engineering, Electrical & Electronic; Telecommunications	Ghalib, M; Ahmed, A; Al-Shiab, I; Bouida, Z; Ibnkahla, M	[Ghalib, Marwan; Ahmed, Arslan; Al-Shiab, Ismael; Bouida, Zied; Ibnkahla, Mohamed] Carleton Univ, Syst & Comp Engn SCE Dept, Ottawa, ON, Canada	10.1109/ICCW.2018.8403791
	2018	Modeling Aggregate Hourly ENERGY CONSUMPTION in a Regional BUILDING Stock	Sound estimates of future heat and electriCITY DEMAND with high temporal and spatial resolution are needed for ENERGY system planning, grid design, and evaluating DEMAND-side management options and POLICES on regional and national levels. In this study, smart meter data on electriCITY CONSUMPTION in BUILDINGS are combined with cross-sectional BUILDING information to model hourly electriCITY CONSU…	ENERGY systems; smart meter data; hourly electriCITY CONSUMPTION; panel data; DISTRICT heat	artificial neural-networks; regression-analysis; electriCITY CONSUMPTION; RESIDENTIAL sector; commercial BUILDINGS; prediction; DEMAND; HOUSEHOLDS; profiles; systems	Yes		CO2 emission/energy consumption prediction			Energies	J	Article	3	Energy & Fuels	Kipping, A; Tromborg, E	[Kipping, Anna; Tromborg, Erik] Norwegian Univ Life Sci, Fac Environm Sci & Nat Resource Management, POB 5003, N-1432 As, Norway	10.3390/en11010078	Oslo	Norway
	2018	Enabling Cooperative Behavior for BUILDING DEMAND Response Based on Extended Joint ACTION Learning	This paper explores the USE of distributed intelligence to assist the integration of the DEMAND as a flexible resource, to MITIGATE the emerging uncertainty in the power system, while fulfilling the cUSTOMER's local needs, i.e., comfort management. More exactly, our contribution is twofold. First, we propose a novel cooperative and decentralized REINFORCEMENT LEARNING method, dubbed extended join…	Cooperation; decision-making; DEMAND flexibility; DEMAND response (DR); distributed control; multiagent systems (MAS); smart grid	side management; smart grids; ENERGY; systems; flexibility; optimization; challenges; DWELLINGS; strategy	Yes		demand response			Ieee transactions on industrial informatics	J	Article	5	Automation & Control Systems; Computer Science, Interdisciplinary Applications; Engineering, Industrial	Hurtado, LA; Mocanu, E; Nguyen, PH; Gibescu, M; Kamphuis, RIG	[Hurtado, Luis A.; Mocanu, Elena; Nguyen, Phuong H.; Gibescu, Madeleine; Kamphuis, Rene I. G.] Eindhoven Univ Technol, Dept Elect Engn, NL-5612 AZ Eindhoven, Netherlands	10.1109/TII.2017.2753408
	2017	DEMAND forecast of PV integrated bioCLIMATIC BUILDINGS USING ensemble framework	BUILDINGS are one of the major sources of electriCITY and GREENHOUSE GAS emission (GHG) in URBAN areas all around the world. Since a large integration of solar ENERGY is observed in the form of rooftop photovoltaic (PV) units, electriCITY USE of BUILDINGS is highly uncertain due to intermittent nature of solar output power. This leads to poor ENERGY management for both network operators and BUILD…	Smart BUILDING; Ensemble predictors; NEURAL NETWORK; Particle swarm optimization; Bayesian model averaging; Wavelet transform	short-term load; particle swarm optimization; artificial neural-networks; ENERGY-CONSUMPTION; wavelet transform; model; prediction; system; performance; algorithms	Yes		building-level			Applied energy	J	Article	7	Energy & Fuels; Engineering, Chemical	Raza, MQ; Nadarajah, M; Ekanayake, C	Univ Queensland, Sch Informat Technol & Elect Engn, Brisbane, Qld 4072, Australia; Griffith Univ, Sch Engn, Gold Coast 422, Australia	10.1016/j.apenergy.2017.08.192	Queensland	Australia
	2017	Analysis of Heating Expenses in a Large Social HOUSING Stock USING Artificial NEURAL NETWORKS	This paper presents an analysis of heating expenses in a large social HOUSING stock in the North of France. An artificial NEURAL NETWORK (ANN) approach is taken for the analysis of heating CONSUMPTION data collected over four years in 84 social HOUSING residences containing 13,179 DWELLINGS that USE collective heating. Analysis provides an understanding of the influence of both physical and socio…	social HOUSING; heating expenses; artificial NEURAL NETWORK; income; ENERGY performance diagnostic; SAVINGS; renovation	ENERGY-CONSUMPTION; EFFICIENCY; appliance; space	Yes		consumer behavior			Energies	J	Article	3	Energy & Fuels	Zabada, S; Shahrour, I	[Zabada, Shaker] An Najah Natl Univ, Dept Econ, POB 7, Nablus, Palestine; [Shahrour, Isam] Lille Univ, Lab Genie Civil & Geoenvironm, F-59650 Villeneuve Dascq, France	10.3390/en10122086	Lille	France
	2017	ENERGY Management in Smart CITIES Based on Internet of Things: Peak DEMAND REDUCTION and ENERGY SAVINGS	Around the globe, innovation with integrating information and communication technologies (ICT) with physical infrastructure is a top priority for governments in pursuing smart, green living to improve ENERGY EFFICIENCY, protect the environment, improve the quality of life, and bolster economy competitiveness. CITIES today faces multifarious challenges, among which ENERGY EFFICIENCY of HOMES and R…	information and communication technologies; smart CITIES; smart HOME; HOME ENERGY management; Q-LEARNING; USER convenience; peak DEMAND; carbon footprint	HOME; web; devices; systems; service	Yes		building-level	appliance efficiency	demand response	Sensors	J	Article	17	Chemistry, Analytical; Engineering, Electrical & Electronic; Instruments & Instrumentation	Mahapatra, C; Moharana, AK; Leung, VCM	[Mahapatra, Chinmaya; Leung, Victor C. M.] Univ British Columbia, Dept Elect & Comp Engn, 2332 Main Mall, Vancouver, BC V6T 1Z4, Canada; [Moharana, Akshaya Kumar] Powertech Labs Inc, Power Syst Studies, Surrey, BC V3W 7R7, Canada	10.3390/s17122812	Ontario	Canada
	2017	Development of an intelligent BUILDING controller to MITIGATE indoor thermal dissatisfACTION and peak ENERGY DEMANDS in a DISTRICT HEATING system	DISTRICT HEATING systems were gradually improved with the development of generation, storage, distribution technologies, and the DEMANDS continued to expand significantly. The percentage of HOUSES supplied by DISTRICT HEATING systems were fast grown up, and it was reported that the global market for the systems would expand by about 6% in the period between 2016 and 2024. However, most studies fo…	Intelligent BUILDING control; ENERGY SAVINGS; Indoor thermal environment; Peak DEMANDS; Temperature prediction; DISTRICT HEATING system	fuzzy control; performance	Yes		district heating and cooling			Building and environment	J	Article	10	Construction & Building Technology; Engineering, Environmental; Engineering, Civil	Ahn, J; Cho, S	[Ahn, Jonghoon; Cho, Soolyeon] North Carolina State Univ, Raleigh, NC 27695 USA	10.1016/j.buildenv.2017.07.040
	2017	Online short-term forecast of greenHOUSE heat load USING a weather forecast service	In some DISTRICT HEATING systems, greenHOUSES represent a significant share of the total load, and can lead to operational challenges. Short term load forecast of such consumers has a strong potential to contribute to the improvement of the overall system EFFICIENCY. This work investigates the performance of recursive least squares for predicting the heat load of individual greenHOUSES in an onli…	Heat DEMAND; Load forecast; Recursive least squares; Weather forecast service; GreenHOUSES; Model selection	neural-networks; ENERGY-CONSUMPTION; prediction; machine; systems; temperature; ensemble; model	Yes		district heating and cooling			Applied energy	J	Article	3	Energy & Fuels; Engineering, Chemical	Vogler-Finck, PJC; Bacher, P; Madsen, H	[Vogler-Finck, P. J. C.] Neogrid Technol ApS, Niels Jernes Vej 10, DK-9220 Aalborg O, Denmark; [Vogler-Finck, P. J. C.] Aalborg Univ, Dept Elect Syst, Fredrik Bajers Vej 7, DK-9220 Aalborg O, Denmark; [Bacher, P.; Madsen, H.] Tech Univ Denmark, Dept Appl Math & Comp Sci, Asmussens Alle, DK-2800 Lyngby, Denmark	10.1016/j.apenergy.2017.08.013	Funen	Denmark
	2017	Requalifying public BUILDINGS and utilities USING a group decision support system	Public BUILDINGS and utilities are responsible for a significant share of ENERGY CONSUMPTION and other related CO2 emissions. There is therefore an acute need for ENERGY requalification interventions. Unfortunately, MUNICIPALITIES are under tight budget constraints but decisions have to be made. A new hybrid group decision support system has been proposed in a bid to provide them with firm, trans…	ENERGY requalification; Decision support system; AHP; ClUSTERING; Knapsack	rough set approach; sorting problems; information; classification; flowsort; ranking	Yes		retrofit envelope	operational efficiency		Journal of cleaner production	J	Article	6	Green & Sustainable Science & Technology; Engineering, Environmental; Environmental Sciences	Lolli, F; Ishizaka, A; Gamberini, R; Rimini, B; Balugani, E; Prandini, L	[Lolli, Francesco; Gamberini, Rita; Rimini, Bianca; Balugani, Elia; Prandini, Laura] Univ Modena & Reggio Emilia, Dept Sci & Methods Engn, Via Amendola 2, I-42122 Reggio Emilia, Italy; [Ishizaka, Alessio] Univ Portsmouth, Portsmouth Business Sch, Ctr Operat Res & Logist, Portsmouth, Hants, England	10.1016/j.jclepro.2017.07.031
	2017	BUILDING ENERGY performance prediction USING NEURAL NETWORKS	The ENERGY in BUILDINGS is influenced by numerous factors characterized by non-linear multi-interrelationships. Consequently, the prediction of the ENERGY performance of a BUILDING, in the presence of these factors, becomes a complex task. The work presented in this paper utilizes risk and sensitivity analysis and applies artificial NEURAL NETWORKS (ANNs) to predict the ENERGY performance of BUIL…	Artificial NEURAL NETWORKS (ANNs); BUILDINGS ENERGY Rating (BER); ENERGY performance; BUILDINGS; Prediction	simple tool; CONSUMPTION; models; simulation; evaluate	Yes	Confirmed	CO2 emission/energy consumption prediction			Energy efficiency	J	Article	2	Green & Sustainable Science & Technology; Energy & Fuels; Environmental Studies	Chari, A; Christodoulou, S	[Chari, Andreas] Univ Cyprus, Dept Civil & Environm Engn, POB 20537, CY-1678 Nicosia, Cyprus; [Christodoulou, Symeon] Univ Cyprus, Dept Civil & Environm Engn, POB 20537, CY-1678 Nicosia, Cyprus	10.1007/s12053-017-9524-5		Ireland
	2017	Modelling of AQI related to BUILDING space heating ENERGY DEMAND based on big data analytics	According to the annual air quality report released by the Ministry of Environmental Protection of China, the CITIES that requiring heating reported an average of 168.3 days that could not reach the air quality standard, which was 59.8% higher than warm CITIES that did not require heating in 2014. Coal-fired ENERGY conversion for BUILDING space heating can generate a large amount of haze pollutio…	AQI; ENERGY conversion for BUILDING space heating; Direct pollutant emission; Regenerated pollutant emission; URBAN self-purifying capaCITY	particulate matter; air-pollution; china; impact; variability; pollutants; exposure; health; pm2.5	Yes		building-level	demand response		Applied energy	J	Article	14	Energy & Fuels; Engineering, Chemical	Li, H; You, SJ; Zhang, H; Zheng, WD; Zheng, XJ; Jia, J; Ye, TZ; Zou, LJ	[Li, Han; You, Shijun; Zhang, Huan; Zheng, Wandong; Zheng, Xuejing; Ye, Tianzhen] Tianjin Univ, Sch Environm Sci & Engn, Tianjin, Peoples R China; [Li, Han; You, Shijun; Zhang, Huan] Tianjin Univ, Key Lab Efficient Utilizat Low & Medium Grade Ene, MOE, Tianjin 300350, Peoples R China; [Zheng, Wandong] China Acad Bldg Res, State Key Lab Bldg Safety & Built Environm, Beijing 100013, Peoples R China…	10.1016/j.apenergy.2017.06.002		China
	2017	Modelling the relationship between heating ENERGY USE and indoor temperatures in RESIDENTIAL BUILDINGS through Artificial NEURAL NETWORKS considering occupant behavior	The heating ENERGY DEMAND stated in ENERGY performance certificates (EPC) and in other instruments USED in the of evaluation of BUILDING's ENERGY performance is USUALLY determined assuming very specific (reference) indoor behavioral/heating patterns. Particularly, they tend to assume that HOUSEHOLDS heat (nearly) the entire HOUSE to a "comfort" temperature during (nearly) all the heating season. …	Heating ENERGY USE; Indoor temperatures; RESIDENTIAL BUILDINGS; Artificial NEURAL NETWORKS; Modeling	regression-models; statistical-model; office BUILDINGS; united-states; CONSUMPTION; performance; DEMAND; space; validation; design	Yes		building-level			Energy and buildings	J	Article	23	Construction & Building Technology; Energy & Fuels; Engineering, Civil	Magalhaes, SMC; Leal, VMS; Horta, IM	[Magalhaes, Sara M. C.] Univ Porto, Fac Engn, Inst Sci & Innovat Mech & Ind Engn, Rua Dr Roberto Farias, P-4200465 Oporto, Portugal; [Leal, Vitor M. S.] Univ Porto, Fac Engn, Dept Mech Engn, Rua Dr Roberto Farias, P-4200465 Oporto, Portugal; [Horta, Isabel M.] Univ Porto, Fac Engn, Dept Ind Management & Engn, Rua Dr Roberto Frias, P-4200465 Oporto, Portugal	10.1016/j.enbuild.2017.06.076
	2017	Hygrothermal Dynamic and Mould Growth Risk Predictions for Concrete Tiles by USING Least Squares SUPPORT VECTOR MACHINES	The hygrothermal analysis of roofs is relevant due to the large areas exposed to a wide range of weather conditions, these directly affecting the ENERGY performance and thermal comfort of BUILDINGS. However, after a long life service, the solar absorptivity coatings of roofs can be altered by mould accumulation. Based on two well established mathematical models, one that adopts driving potentials…	SUPPORT VECTOR MACHINES; MACHINE LEARNING; system identification; concrete tiles; hygrothermal performance; mould growth	thermal performance; ENERGY-CONSUMPTION; regression; heat; roof; insulation; BUILDINGS; model; CLIMATE; DEMAND	Yes		retrofit envelope			Energies	J	Article	2	Energy & Fuels	Freire, RZ; dos Santos, GH; Coelho, LD	[Freire, Roberto Zanetti; Coelho, Leandro dos Santos] Pontifical Catholic Univ Parana PUCPR, Polytech School EP, Ind & Syst Engn Grad Program PPGEPS, Rua Imaculada Conceicao 1155, BR-80215901 Curitiba, Parana, Brazil; [dos Santos, Gerson Henrique] Fed Technol Univ Parana UTFPR, Dept Mech Engn, Ave Monteiro Lobato,Km 04, BR-84016210 Ponta Grossa, Brazil; [Coelho, Leandro dos Santos] Fed Univ Paran…	10.3390/en10081093	Curitiba	Brazil
	2017	Application of the k-means clUSTERING method for the detection and analysis of areas of HOMOGENEOUS RESIDENTIAL electriCITY CONSUMPTIONat the Great La Plata region, Buenos Aires, Argentina	This research aims to detect areas of HOMOGENEOUS RESIDENTIAL electric CONSUMPTION in the Great La Plata, Buenos Aires, Argentina. This study will identify main socio-demographic factors that impact on the electriCITY DEMAND and the geographical location of these areas of HOMOGENEOUS electric CONSUMPTION. Results were analyzed from groups obtained from the six bimestrial electric average CONSUMPT…	Electric CONSUMPTION; ClUSTERING method; K-means; HOMOGENEOUS areas; HOUSEHOLDS; Socio-demographic information	DEMAND; system; USAGE	Yes		consumer behavior			Sustainable cities and society	J	Article	7	Construction & Building Technology; Green & Sustainable Science & Technology; Energy & Fuels	Chevez, P; Barbero, D; Martini, I; Discoli, C	[Chevez, Pedro; Barbero, Dante; Martini, Irene; Discoli, Carlos] UNLP, FAU Sch Architecture & Planning, IIPAC Built Environm Policy Res Inst, Res Grp 1, St 47 162,DC 478, RA-1900 La Plata, Buenos Aires, Argentina	10.1016/j.scs.2017.03.019	Buenos Aires	Argentina
	2017	ENERGY management and primary ENERGY optimization of a thermally interconnected semi-autonomous commercial DISTRICT via optimized mu-CHP dispatch strategy	The paper presents the ENERGY balance and Primary ENERGY CONSUMPTION of a pertinent innovative ENERGY management concept for DISTRICTS with BUILDINGS coupled by thermal and electric micro-grids. A group of centrally controlled-CHP units produces heat and power within the DISTRICT bounds. Power imports/exports to the public grid and heating auxiliary boilers sUSTAIN the balance between production …	mu-CHP; Thermal storage; Forecasting; ElectriCITY-market; Interconnected DISTRICT; Variable primary ENERGY factor	micro-cogeneration device; short-term; neural-networks; combined heat; systems; engine; simulations; performance; CONSUMPTION; electriCITY	Yes		district heating and cooling			Sustainable cities and society	J	Article	3	Construction & Building Technology; Green & Sustainable Science & Technology; Energy & Fuels	Malliotakis, E; Founti, M	[Malliotakis, Emmanouil; Founti, Maria] Natl Tech Univ Athens, Sch Mech Engn, 9 Heroon Polytech Str, Athens 15780, Greece	10.1016/j.scs.2017.03.014	Munich	Germany
	2017	A study on ENERGY performance of 30 commercial office BUILDINGS in Hong Kong	A study of ENERGY performance of 30 existing commercial office BUILDINGS in Hong Kong has been carried out. ENERGY audits have been conducted and the data obtained from utility bills, design documents and on-site measurements have been thoroughly assessed. ENERGY Utilization Index (EUI) as well as carbon emission of each BUILDING have been calculated to compare with previous studies and other ben…	ENERGY performance; Commercial office BUILDINGS; Hong Kong; ENERGY utilization index; Multiple regression analysis; BP NEURAL NETWORK	regression-analysis; CONSUMPTION; DEMAND	Yes		building-level	operational efficiency		Energy and buildings	J	Article	37	Construction & Building Technology; Energy & Fuels; Engineering, Civil	Jing, R; Wang, M; Zhang, RX; Li, N; Zhao, YR	[Jing, Rui; Wang, Meng; Li, Ning; Zhao, Yingru] Xiamen Univ, Coll Energy, Xiamen, Peoples R China; [Zhang, Ruoxi] Xiamen Univ, Sch Architecture & Civil Engn, Xiamen, Peoples R China	10.1016/j.enbuild.2017.03.042	Hong Kong	Hong Kong
	2017	Multiscale stochastic prediction of electriCITY DEMAND in smart grids USING BAYESIAN NETWORKS	DEMAND management in RESIDENTIAL BUILDINGS is a key component TOWARD sUSTAINABILITY and EFFICIENCY in URBAN environments. The recent advancements in sensor based technologies hold the promise of novel ENERGY CONSUMPTION models that can better characterize the underlying patterns. In this paper, we propose a probabilistic data-driven predictive model for CONSUMPTION forecasting in RESIDENTIAL BUIL…	BAYESIAN NETWORKS; Forecasting; MACHINE LEARNING; Prediction; Probabilistic modeling; Smart grid	ENERGY-CONSUMPTION; independence	Yes		building-level	CO2 emission/energy consumption prediction		Applied energy	J	Article	20	Energy & Fuels; Engineering, Chemical	Bassamzadeh, N; Ghanem, R	[Bassamzadeh, Nastaran] Univ Southern Calif, Dept Civil Engn, Los Angeles, CA 90089 USA; [Ghanem, Roger] Univ Southern Calif, Viterbi Sch Engn, Los Angeles, CA 90089 USA	10.1016/j.apenergy.2017.01.017
	2017	Influencing factors in ENERGY USE of HOUSING blocks: a new methodology, based on clUSTERING and ENERGY simulations, for decision making in ENERGY refurbishment projects	In recent years, big efforts have been dedicated to identify which are the factors with highest influence in the ENERGY CONSUMPTION of RESIDENTIAL BUILDINGS. These factors include aspects such as weather dependence, USER behaviour, socio-economic situation, type of the ENERGY installations and typology of BUILDINGS. The high number of factors increases the complexity of analysis and leads to a la…	BUILDING ENERGY USE; ENERGY BUILDING simulation; ClUSTERING analysis; URBAN ENERGY refurbishment	BUILDINGS; CONSUMPTION; information; classification; EFFICIENCY; profiles; SAVINGS; models	Yes		retrofit envelope	consumer behavior	building-level	Energy efficiency	J	Article	1	Green & Sustainable Science & Technology; Energy & Fuels; Environmental Studies	Cipriano, X; Vellido, A; Cipriano, J; Marti-Herrero, J; Danov, S	[Cipriano, X.; Marti-Herrero, J.; Danov, S.] CIMNE, Bldg Energy & Environm Grp, Edifici GAIA TR14,C Rambla St Nebridi 22, Barcelona 08222, Spain; [Vellido, A.] Univ Politecn Catalunya UPC Barcelona Tech, Comp Sci, Campus Nord UPC, Barcelona 08034, Spain; [Cipriano, J.] CIMNE, Bldg Energy & Environm Grp, CIMNE UdL Classroom,Pere de Cabrera S-N Bldg, Lleida 25001, Spain; [Marti-Herrero, J.] Inst Na…	10.1007/s12053-016-9460-9	Terrassa	Spain
	2017	Load estimation for microgrid planning based on a SELF-ORGANIZING MAP methodology	This study presents a novel load estimation method for isolated communities that do not receive ENERGY or only receive it for a limited time each day. These profiles have been USED to determine the installed capaCITY of generating units for microgrid electrification projects. The social characteristics and lifestyles of isolated communities differ from those in URBAN areas; therefore, the load pr…	Planning; Microgrid; SELF-ORGANIZING MAP (SOM); Load profile		Yes		Utility infrastructure planning	consumer behavior	building-level	Applied soft computing	J	Article	11	Computer Science, Artificial Intelligence; Computer Science, Interdisciplinary Applications	Llanos, J; Morales, R; Nunez, A; Saez, D; Lacalle, M; Marin, LG; Hernandez, R; Lanasa, F	[Llanos, Jcquelin; Morales, Raul; Saez, Doris; Lacalle, Matias; Gabriel Marin, Luis; Lanas, Fernando] Univ Chile, Dept Elect Engn, Santiago, Chile; [Nunez, Alfredo] Delft Univ Technol, Sect Railway Engn, Delft, Netherlands; [Hernandez, Roberto] Univ Chile, Fac Phys & Math Sci, Energy Ctr, Santiago, Chile	10.1016/j.asoc.2016.12.054	El Romeral, Huatacondo	Chile
	2017	A relevant data selection method for ENERGY CONSUMPTION prediction of low ENERGY BUILDING based on SUPPORT VECTOR MACHINE	Low ENERGY BUILDINGS (LEBs) are being considered as a promising solution for the BUILT ENVIRONMENT to satisfy high-ENERGY EFFICIENCY standards. The technology is based on lowering the overall heat transmission coefficient value (U-value) of the BUILDINGS envelope and increasing a heat capaCITY thus creating a higher thermal inertia. However, LEB introduces a large time constant compared to conven…	BUILDING ENERGY CONSUMPTION; Prediction; Low ENERGY BUILDING; SUPPORT VECTOR MACHINE; Online and offline learning	neural-network; load; performance; system; model	Yes		new buildings	building-level		Energy and buildings	J	Article	28	Construction & Building Technology; Energy & Fuels; Engineering, Civil	Paudel, S; Elmitri, M; Couturier, S; Nguyen, PH; Kamphuis, R; Lacarriere, B; Le Corre, O	[Paudel, Subodh; Lacarriere, Bruno; Le Corre, Olivier] Ecole Mines Nantes, GEPEA, CNRS, UMR 6144,Dept Energy Syst & Environm, Nantes, France; [Paudel, Subodh; Elmitri, Mohamed; Couturier, Stephane] Veolia Rech & Innovat VERI, Limay, France; [Paudel, Subodh; Nguyen, Phuong H.; Kamphuis, Rene] Eindhoven Univ Technol, Dept Elect Engn, Eindhoven, Netherlands	10.1016/j.enbuild.2016.11.009
	2017	Modeling HOUSEHOLD ENERGY expenditure in the United States	ENERGY CONSUMPTION is one of the main source of air pollution, GREENHOUSE GAS emission, and global warming. REDUCING HOUSEHOLD ENERGY CONSUMPTION is a key goal of POLICYMAKERS. We develop statistical models USING socio-economics and demographics, BUILDING characteristics, location, temperature, and ENERGY prices to estimate HOUSEHOLD ENERGY expenditure in the U.S. We USE HOUSEHOLD ENERGY expendit…	HOUSEHOLD ENERGY expenditure; Gas expenditure; ElectriCITY expenditure; REDUCING HOUSEHOLD ENERGY CONSUMPTION; PRINCIPAL COMPONENT ANALYSIS; Statistical data analysis	RESIDENTIAL electriCITY DEMAND; space heating expenditures; empirical-evidence; CLIMATE-change; top-down; end-USE; CONSUMPTION; sector; BUILDINGS; determinants	Yes		consumer behavior			Renewable & sustainable energy reviews	J	Review	17	Green & Sustainable Science & Technology; Energy & Fuels	Salari, M; Javid, RJ	[Salari, Mahmoud] Texas Tech Univ, Dept Econ, Lubbock, TX 79409 USA; [Javid, Roxana J.] Savannah State Univ, Dept Engn Technol, Savannah, GA 31404 USA	10.1016/j.rser.2016.11.183		USA
	2017	Modeling the economic dependence between TOWN development POLICY and increasing ENERGY effectiveness with NEURAL NETWORKS. Case study: The TOWN of Zielona Gora	Due to the changes in legal requirements, growth of ENERGY CONSUMPTION from different media and prices increase it is necessary to change the attitude of URBAN consumers. Achieving the objectives of ENERGY POLICY in each country requires societies to consolidate the confidence that REDUCING the DEMAND for ENERGY will pay to each HOUSEHOLD. Creating a positive investment CLIMATE, promoting new mod…	ENERGY EFFICIENCY increase in HOUSING; Multi-layer NEURAL NETWORKS; Radial NEURAL NETWORKS; URBAN ENERGY POLICY; Space POLICY; ENERGY poverty	FUEL poverty; CONSUMPTION; electriCITY; strategies; EFFICIENCY; BUILDINGS; insights; jUSTICE; DEMAND; sector	Yes		retrofit envelope			Applied energy	J	Article	18	Energy & Fuels; Engineering, Chemical	Skiba, M; Mrowczynska, M; Bazan-Krzywoszanska, A	[Skiba, Marta; Mrowczynska, Maria; Bazan-Krzywoszanska, Anna] Univ Zielona Gora, Fac Civil Engn Architecture & Environm Engn, Licealna 9, PL-65417 Zielona Gora, Poland	10.1016/j.apenergy.2016.12.006	Zielona Góra	Poland
	2017	Prediction of temperature decreasing on a green roof by USING artificial NEURAL NETWORK	This study presents an artificial NEURAL NETWORK (ANN) model to predict temperature decreasing on a green roof. An ANN model has been created by MATLAB NEURAL NETWORK Toolbox. The data for training, test and validation of the ANN model have been taken from nine different CITIES around the world. Meteorological data sets and temperature decreasing values on the green roof for these nine CITIES hav…	Green roof; Temperature decreasing; Thermal comfort; Artificial NEURAL NETWORK; Roof cooling	performance; BUILDINGS	Yes		retrofit envelope			Applied thermal engineering	J	Article	9	Thermodynamics; Energy & Fuels; Engineering, Mechanical; Mechanics	Erdemir, D; Ayata, T	[Erdemir, Dogan] Erciyes Univ, Dept Mech Engn, TR-38039 Kayseri, Turkey; [Ayata, Tahir] Erciyes Univ, KMY, TR-38039 Kayseri, Turkey	10.1016/j.applthermaleng.2016.10.145	Kayseri	Turkey
	2017	Total Optimization of Smart CITY USING Initial Searching Points Generation Based on k-means Algorithm	This paper proposes total optimization of smart CITY (smart community, SC) USING initial searching points generation based on k-means algorithm. In this paper, ENERGY flow models of various sectors in SC are utilized. Namely, ENERGY supply models such as electric power utility, natural gas utility, drinking water treatment plant, and waste water treatment plant, and ENERGY CONSUMPTION models such…	k-means; Differential evolutionary particle swarm optimization; Smart CITY; Total optimization		Yes	Confirmed	Modeling method contribution			Advances in swarm intelligence, icsi 2017, pt ii	S	Proceedings Paper	0	Computer Science, Artificial Intelligence; Computer Science, Theory & Methods	Sato, M; Fukuyama, Y	[Sato, Mayuko; Fukuyama, Yoshikazu] Meiji Univ, Tokyo, Japan	10.1007/978-3-319-61833-3_31		Japan
	2017	A Hybrid Dasymetric and MACHINE LEARNING Approach to High-Resolution RESIDENTIAL ElectriCITY CONSUMPTION Modeling	As URBAN areas continue to grow and evolve in a world of increasing environmental awareness, the need for detailed information regarding RESIDENTIAL ENERGY CONSUMPTION patterns has become increasingly important. Though current modeling efforts mark significant progress in the effort to better understand the spatial distribution of ENERGY CONSUMPTION, the majority of techniques are highly dependen…	ENERGY modeling; Dasymetric modeling; MACHINE LEARNING	HOUSEHOLD sector; ENERGY; population; appliance	Yes		CO2 emission/energy consumption prediction			Advances in geocomputation	S	Proceedings Paper	2	Computer Science, Information Systems; Computer Science, Interdisciplinary Applications; Geography, Physical	Morton, A; Nagle, N; Piburn, J; Stewart, RN; McManamay, R	[Morton, April; Nagle, Nicholas; Piburn, Jesse; Stewart, Robert N.; McManamay, Ryan] Oak Ridge Natl Lab, 1 Bethel Valley Rd, Oak Ridge, TN 37831 USA	10.1007/978-3-319-22786-3_5	Knoxville	USA
	2017	A Generalizable Method for Estimating HOUSEHOLD ENERGY by NEIGHBORHOODS in US URBAN Regions	There is mounting evidence to suggest that the URBAN built form plays a crucial role in HOUSEHOLD ENERGY CONSUMPTION, hence planning ENERGY efficient CITIES requires thoughtful design at multiple scales - from BUILDINGS, to NEIGHBORHOODS, to URBAN regions. While data on HOUSEHOLD ENERGY USE are essential for examining the ENERGY implications of different built forms, few utilities providing power…	ENERGY modeling; RESIDENTIAL ENERGY; MACHINE LEARNING; HOUSEHOLD synthesis; statistical matching	RESIDENTIAL sector; neural-networks; CONSUMPTION; space; model; canada; DEMAND; china	Yes		CO2 emission/energy consumption prediction	fuel switch		Leveraging energy technologies and policy options for low carbon cities	S	Proceedings Paper	0	Green & Sustainable Science & Technology; Energy & Fuels	Zhang, WW; Guhathakurta, S; Pendyala, R; Garikapati, V; Ross, C	[Zhang, Wenwen; Guhathakurta, Subhrajit] Georgia Tech, Ctr Geog Informat Syst, 760 Spring St NW, Atlanta, GA 30308 USA; [Pendyala, Ram; Garikapati, Venu] Arizona State Univ, Ira A Fulton Sch Engn, Sch Sustainable Engn & Built Environm, Tempe, AZ 85287 USA; [Ross, Catherine] Georgia Tech, Ctr Qual Growth & Reg Dev, 760 Spring St NW, Atlanta, GA 30308 USA	10.1016/j.egypro.2017.12.774	Atlanta	USA
	2017	Probabilistic Commercial Load Profiles at Different CLIMATE Zones	This paper presents a numerical representation for commercial load profiles based on different CLIMATE zones. The load profiles of 16 commercial BUILDINGS located in 935 CITIES representing 50 States in the United States (U.S.) are clUSTERED USING k-means considering the geographic coordinates and the time zones. The geographic coordinate works as a local criterion to assign a CLIMATE zone for CI…	Commercial load profiles; commercial cUSTOMERS; load model; ENERGY DEMAND; time series		Yes		building-level			2017 ieee electrical power and energy conference (epec)	S	Proceedings Paper	0	Energy & Fuels; Engineering, Electrical & Electronic	Alshareef, SM; Morsi, WG	[Alshareef, Sami M.; Morsi, Walid G.] UOIT, Fac Engn & Appl Sci, Dept Elect Comp & Software Engn, Oshawa, ON, Canada	10.1109/EPEC.2017.8286233		USA
	2017	Time-series decomposition of power DEMAND data to extract uncertain features	The spread of smart meters means that a large amount of power DEMAND information from private HOUSES is being collected around the world. Owing to the development of smart CITY infrastructure, the USE of standardized frameworks for extracting features from power DEMAND information has become vital. In this paper, we propose a novel decomposition approach USEFUL for extracting feature values from …	feature extrACTION; classification; SUPPORT VECTOR MACHINE; discrete fourier transform; power DEMAND information		Yes		building-level			2017 ieee 26th international symposium on industrial electronics (isie)	S	Proceedings Paper	0	Engineering, Electrical & Electronic	Imanishi, T; Yoshida, M; Wijekoon, J; Nishi, H	[Imanishi, Tomoya; Yoshida, Masahiro; Wijekoon, Janaka; Nishi, Hiroaki] Keio Univ, Grad Sch Sci & Technol, Kohoku Ku, 3-14-1 Hiyoshi, Yokohama, Kanagawa 2238522, Japan	10.1109/ISIE.2017.8001473		Japan
	2017	Data-Driven RESIDENTIAL BUILDING ENERGY CONSUMPTION Prediction for Supporting Multiscale SUSTAINABILITY Assessment	SUSTAINABILITY assessment has drawn much attention worldwide. However, current sUSTAINABILITY assessment models/systems are USUALLY focUSED on a single scale, which does not allow for capturing the interdependencies across the different scales. Also, existing sUSTAINABILITY assessment models/systems typically require high levels of data collection and complex measurements, which is USUALLY costly…	Multiscale sUSTAINABILITY assessment and prediction; RESIDENTIAL BUILDING ENERGY CONSUMPTION prediction; Feature selection; MACHINE LEARNING	selection	Yes		CO2 emission/energy consumption prediction	building-level		Computing in civil engineering 2017: information modelling and data analytics	B	Proceedings Paper	1	Computer Science, Interdisciplinary Applications; Engineering, Civil	Wang, LF; El-Gohary, NM	[Wang, Lufan; El-Gohary, Nora M.] Univ Illinois, Dept Civil & Environm Engn, 205 North Mathews Ave, Urbana, IL 61801 USA
	2017	ENERGY SAVINGS in the Jordanian RESIDENTIAL Sector	The aim of the present study is to evaluate the REDUCTION in ENERGY USE in terms of CONSUMPTION and cost in the Jordanian RESIDENTIAL sector resulting from applying ENERGY EFFICIENCY measures. A baseline model for HOUSES in Jordan has been developed to represent the average DWELLING unit in terms of construction and ENERGY CONSUMPTION USING the outcome of governmental surveys. Three ENERGY EFFICI…	ENERGY; Jordan; RESIDENTIAL Sector; Simulation	neural-networks; solar-system; optimization; design	Yes		retrofit envelope	operational efficiency	appliance efficiency	Jordan journal of mechanical and industrial engineering	J	Article	3	Engineering, Mechanical	Jarad, H; Ashhab	[Jarad, Hasan; Ashhab, Mohd Sami] Hashemite Univ, Dept Mech Engn, Zarqa 13115, Jordan; [Ashhab, Mohd Sami] Amer Univ Ras Al Khaimah, Dept Mech & Ind Engn, Ras Al Khaymah, U Arab Emirates			Jordan
	2017	An analyze of long-term hourly DISTRICT heat DEMAND forecasting of a commercial BUILDING USING NEURAL NETWORKS	With the BUILDING sector standing for a major part of the world's ENERGY USAGE it of utmost importance to develop new ways of REDUCE the CONSUMPTION in the sector. This paper discUSSES the evolution of the regulations and POLICIES of the Swedish electric and DISTRICT HEATING metering markets followed by the development of a nonlinear autoregressive NEURAL NETWORK with external input (NARX), with …	DISTRICT HEATING; Smart-meter data; Heat load forecast; NEURAL NETWORK; ENERGY meter POLICIES		Yes	Confirmed	demand response	district heating and cooling		8th international conference on applied energy (icae2016)	S	Proceedings Paper	3	Energy & Fuels	Sandberg, A; Wallin, F; Li, HL; Azaza, M	[Sandberg, Alexander; Wallin, Fredrik; Li, Hailong; Azaza, Maher] Malardalens Univ, Vasteras, Sweden	10.1016/j.egypro.2017.03.884	Mälardalen	Sweden
	2017	Locating Multi ENERGY Systems for A NEIGHBORHOOD In Geneva USING K-Means ClUSTERING	To determine the optimum location for non dispatchable renewable ENERGY systems, this study comes up with an integrated tool to place ENERGY systems considering distributed ENERGY DEMAND and renewable ENERGY potential. The CITYsim URBAN ENERGY planning software is USED to compute the hourly heating DEMAND of 371 BUILDINGS in Jonction, a NEIGHBORHOOD in Geneva. Hourly solar irradiation on the roof…	distributed ENERGY systems; ENERGY-economic analysis; K-means clUSTERING; thermal networks; URBAN ENERGY systems		Yes		Utility infrastructure planning			Cisbat 2017 international conference future buildings & districts - energy efficiency from nano to urban scale	S	Proceedings Paper	1	Construction & Building Technology; Energy & Fuels	Bitter, HM; Perera, ATD; Mauree, D; Scartezzini, JL	[Bitter, Henri Max; Perera, A. T. D.; Mauree, Dasaraden; Scartezzini, Jean-Louis] Ecole Polytech Fed Lausanne, Solar Energy & Bldg Phys Lab, CH-1015 Lausanne, Switzerland	10.1016/j.egypro.2017.07.341	Geneva	Switzerland
	2017	Application of ClUSTERING Methods for Discovering Patterns of ENERGY USE in Regional Areas for the RESIDENTIAL Sector	Today the wide and increasing implementation of smart meters on the HOUSEHOLD level is making it possible to better know the USE of electriCITY by RESIDENTIAL consumers. This contributes to improving the quality of the services provided to the consumers and also developing new strategies for planning and operation by the power grid managers. This paper analyses the discovering of patterns in the …	clUSTERING methods; RESIDENTIAL USE of ENERGY; pattern discovering; HIERARCHICAL CLUSTERING; self-organized maps		Yes		CO2 emission/energy consumption prediction			2017 ieee manchester powertech	B	Proceedings Paper	0	Engineering, Electrical & Electronic	Costacurta, LG; Sanz-Bobi, MA	[Gelabert Costacurta, Laura; Sanz-Bobi, Miguel A.] Comillas Pontifical Univ, Engn Sch ICAI, Inst Res Technol IIT, Madrid, Spain	10.1109/PTC.2017.7980923		USA
	2017	Design of electriCITY tariff plans USING gap statistic for K-means clUSTERING based on consumers monthly electriCITY CONSUMPTION data	Purpose - ElectriCITY CONSUMPTION around the world and in India is continuoUSLY increasing over the years. Presently, there is a huge diversity in electriCITY tariffs across states in India. This paper aims to focus on development of new tariff design method USING K-means clUSTERING and gap statistic. Design/methodology/approach - Numbers of tariff plans are selected USING gap-statistic for K-mea…	Reform; Surveys; Pricing; POLICY; Regression; ElectriCITY; Cost comparison; Data mining; Cost-benefit analysis	ENERGY-CONSUMPTION; load profiles; pattern; classification; prediction; losses; number; model	Yes		consumer behavior			International journal of energy sector management	J	Article	0	Management	Rathod, RR; Garg, RD	[Rathod, Ravindra R.; Garg, Rahul Dev] Indian Inst Technol Roorkee, Dept Civil Engn, Roorkee, Uttar Pradesh, India; [Rathod, Ravindra R.] Walchand Coll Engn, Dept Informat Technol, Sangli, India	10.1108/IJESM-02-2016-0005	Sangli	India
	2017	SUSTAINABLE URBAN Development on the Example of the HOUSING Deveopment of Zielona Gora (Poland), as a Response to the CLIMATE POLICY of the European Union	In the world, in Europe, and also in Poland the USE of ENERGY is growing rapidly, caUSING concern about the difficulty of supply, a depletion of non-renewable ENERGY resources and the increase in negative impacts on the environment (ozone depletion, global warming, CLIMATE change, etc. caUSED by increased emissions of CO2) (Balaras et al. 2005). POLITICAL or economic attempts to enforce CLIMATE c…	URBAN structure; sUSTAINABLE URBAN development; the local POLICY; the protection of the environment; NEURAL NETWORK	ENERGY-CONSUMPTION; BUILDINGS; system; CITY	Yes		CO2 emission/energy consumption prediction			10th international conference environmental engineering (10th icee)	S	Proceedings Paper	0	Engineering, Environmental	Bazan-Krzywoszanska, A; Mrowczynska, M; Skiba, M; Sztubecka, M	[Bazan-Krzywoszanska, Anna; Mrowczynska, Maria; Skiba, Marta] Univ Zielona Gora, Fac Civil Engn Architecture & Environm Engn, Zielona Gora, Poland; [Sztubecka, Malgorzata] Univ Technol & Life Sci Bydgoszcz, Fac Civil & Environm Engn & Architecture, Bydgoszcz, Poland	10.3846/enviro.2017.119	Zielona Góra	Poland
	2017	Regularization in Hierarchical Time Series Forecasting with Application to ElectriCITY Smart Meter Data	Accurate electriCITY DEMAND forecast plays a key role in sUSTAINABLE power systems. It enables better decision making in the planning of electriCITY generation and distribution for many USE cases. The electriCITY DEMAND data can often be represented in a hierarchical structure. For example, the electriCITY CONSUMPTION of a whole country could be disaggregated by states, CITIES, and HOUSEHOLDS. Hi…		lasso; shrinkage; selection	Yes		CO2 emission/energy consumption prediction	building-level		Thirty-first aaai conference on artificial intelligence	B	Proceedings Paper	4	Computer Science, Artificial Intelligence; Computer Science, Theory & Methods; Engineering, Electrical & Electronic	Ben Taieb, S; Yu, JF; Barreto, MN; Rajagopal, R	[Ben Taieb, Souhaib] Monash Univ, Monash Business Sch, Clayton, Vic, Australia; [Yu, Jiafan; Rajagopal, Ram] Stanford Univ, Dept CEE, Stanford, CA 94305 USA; [Barreto, Mateus Neves] Univ Estadual Campinas, FEEC, Campinas, SP, Brazil	10.1609/aaai.v31i1.11167
	2016	Estimation of the BUILDING ENERGY USE intensity in the URBAN scale by integrating GIS and big data technology	BUILDINGS are the major source of ENERGY CONSUMPTION in URBAN areas. Accurate modeling and forecasting of the BUILDING ENERGY USE intensity (EUI) in the URBAN scale have many important applications, such as ENERGY benchmarking and URBAN ENERGY infrastructure planning. The USE of Big Data technology is expected to have the capability of integrating a large number of predictors and giving an accura…	Artificial NEURAL NETWORK (ANN); Big Data; ENERGY USE intensity (EUI); Feature selection; Geographic information system (GIS); SUPPORT VECTOR REGRESSION (SVR)	ridge-regression; neural-networks; CLIMATE-change; low-income; CONSUMPTION; prediction; selection; impact; optimization; models	Yes		building-level			Applied energy	J	Article	40	Energy & Fuels; Engineering, Chemical	Ma, J; Cheng, JCP	[Ma, Jun; Cheng, Jack C. P.] Hong Kong Univ Sci & Technol, Dept Civil & Environm Engn, Kowloon, Hong Kong, Peoples R China	10.1016/j.apenergy.2016.08.079	New York City	USA
	2016	Operation management of RESIDENTIAL ENERGY-supplying networks based on optimization approaches	An operation management system for RESIDENTIAL ENERGY-supplying networks USING multiple cogeneration units was developed by hierarchically integrating ENERGY DEMAND prediction, operational planning, and operational control, USING optimization approaches. The ENERGY DEMAND for multiple DWELLINGS was predicted by SUPPORT VECTOR REGRESSION with information on occupant behavior as well as forecasted …	ENERGY management; Microgrid; Cogeneration; Model predictive control; SUPPORT VECTOR REGRESSION; Mixed-integer linear programming	model-predictive control; cogeneration systems; polygeneration systems; power; DEMAND; strategies; BUILDINGS; design; heat; integration	Yes		district heating and cooling	building-level	operational efficiency	Applied energy	J	Article	9	Energy & Fuels; Engineering, Chemical	Wakui, T; Kawayoshi, H; Yokoyama, R; Aki, H	[Wakui, Tetsuya; Kawayoshi, Hiroki; Yokoyama, Ryohei] Osaka Prefecture Univ, Dept Mech Engn, Naka Ku, 1-1 Gakuen Cho, Sakai, Osaka 5998531, Japan; [Aki, Hirohisa] Natl Inst Adv Ind Sci & Technol, Res Inst Sci Safety & Sustainabil, 1-1-1 Umezono, Tsukuba, Ibaraki 3058568, Japan	10.1016/j.apenergy.2016.08.171
	2016	Probabilistic evaluation of solar photovoltaic systems USING BAYESIAN NETWORKS: a discounted cash flow assessment	Solar photovoltaic (PV) technology is now a key contributor worldwide in the transition TOWARDS LOW-CARBON electriCITY systems. To date, PV commonly receives subsidies in order to accelerate adoption rates by increasing investor returns. However, many aleatory and epistemic uncertainties exist with regard to these potential returns. In order to manage these uncertainties, an innovative probabilis…	return on investment; discounted cash flow analysis; PV yield analysis; BAYESIAN NETWORKS; self-CONSUMPTION; BUILDING stock modelling	ENERGY; performance; uk; degradation	Yes		building-level			Progress in photovoltaics	J	Article; Proceedings Paper	1	Energy & Fuels; Materials Science, Multidisciplinary; Physics, Applied	Leicester, PA; Goodier, CI; Rowley, P	[Leicester, Philip A.; Rowley, Paul] Univ Loughborough, Sch Elect Elect & Syst Engn, Ctr Renewable Energy Syst Technol, Loughborough LE11 3TU, Leics, England; [Goodier, Chris I.] Univ Loughborough, Sch Civil & Bldg Engn, Loughborough LE11 3TU, Leics, England	10.1002/pip.2754		United Kingdom
	2016	Model for forecasting RESIDENTIAL heat DEMAND based on natural gas CONSUMPTION and ENERGY performance indicators	The forecasting of ENERGY and natural gas CONSUMPTION is a topic that spans different temporal and spatial scales and addresses scenarios that vary significantly in consistency and extension. Therefore, although forecasting models share common aims, the specific scale at which each model has been developed strongly impacts its features and the parameters that are to be considered or neglected. Th…	Natural gas CONSUMPTION; BUILDING heat DEMAND; ENERGY CONSUMPTION; DISTRICT HEATING	neural-networks; time-series; BUILDINGS; prediction; CLIMATE	Yes		building-level	district heating and cooling		Applied energy	J	Article	21	Energy & Fuels; Engineering, Chemical	Spoladore, A; Borelli, D; Devia, F; Mora, F; Schenone, C	[Spoladore, Alessandro; Borelli, Davide; Devia, Francesco; Schenone, Corrado] Univ Genoa, Dept Mech Engn DIME, Genoa, Italy; [Mora, Flavio] Genova Reti Gas Srl, Genoa, Italy	10.1016/j.apenergy.2016.08.122	Genoa	Italy
	2016	Hourly CONSUMPTION profiles of domestic hot water for different occupant groups in DWELLINGS	Hourly CONSUMPTION data of domestic hot water (DHW) is essential to compute the ENERGY DEMAND, and for system sizing. Few on-site measured data and simulation based studies are available to forecast DHW CONSUMPTION focUSING on a daily average, hourly average, appliance CONSUMPTION, and occupant number. This study derived the hourly DHW profiles for 5 different groups of 1 person, 3 people, 10 peo…	DHW CONSUMPTION; Hourly profile; Weekday; Weekend; RESIDENTIAL BUILDING	RESIDENTIAL sector; apartment BUILDINGS; neural-networks; heating system; performance; ENERGY; resolution; temperature; CLIMATE; DEMAND	Yes		consumer behavior			Solar energy	J	Article	23	Energy & Fuels	Ahmed, K; Pylsy, P; Kurnitski, J	[Ahmed, Kaiser; Pylsy, Petri; Kurnitski, Jarek] Aalto Univ, Dept Civil Engn, Espoo, Finland; [Kurnitski, Jarek] Tallinn Univ Technol, Fac Civil Engn, EE-19086 Tallinn, Estonia; [Pylsy, Petri] Finnish Real Estate Federat, Helsinki, Finland	10.1016/j.solener.2016.08.033	Helsinki	Finland
	2016	Predicting ENERGY performance of a net-zero ENERGY BUILDING: A statistical approach	Performance-based BUILDING requirements have become more prevalent becaUSE it gives freedom in BUILDING design while still maintaining or exceeding the ENERGY performance required by prescriptive based requirements. In order to determine if BUILDING designs reach target ENERGY EFFICIENCY improvements, it is necessary to estimate the ENERGY performance of a BUILDING USING predictive models and dif…	Net-zero; RESIDENTIAL BUILDINGS; Statistical modeling; Whole BUILDING ENERGY simulation; Regression analysis	artificial neural-networks; regression-analysis; multiple-regression; CONSUMPTION; generation; DEMAND; models	Yes		new buildings	building-level		Applied energy	J	Article	28	Energy & Fuels; Engineering, Chemical	Kneifel, J; Webb, D	[Kneifel, Joshua; Webb, David] NIST, 100 Bur Dr,Stop 8603, Gaithersburg, MD 20899 USA	10.1016/j.apenergy.2016.06.013
	2016	Applications of MACHINE LEARNING methods to identifying and predicting BUILDING retrofit opportunities	BUILDING ENERGY conservation measures (ECMs) can significantly lower GREENHOUSE GAS (GHG) emissions from URBAN areas; however, uncertainties regarding not only ECM eligibility, but also associated costs and ENERGY SAVINGS have slowed adoption of ECMs. To encourage ECM implementation, local governments have implemented a range of POLICIES designed to increase the available information on BUILDING …	BUILDING ENERGY; ENERGY retrofit; Predictive modeling; MACHINE LEARNING; URBAN sUSTAINABILITY	ENERGY-CONSUMPTION; performance; information; potentials; disclosure; behavior; CLIMATE	Yes		operational efficiency	fuel switch	appliance efficiency	Energy and buildings	J	Article	17	Construction & Building Technology; Energy & Fuels; Engineering, Civil	Marasco, DE; Kontokosta, CE	[Marasco, Daniel E.; Kontokosta, Constantine E.] NYU, Ctr Urban Sci & Progress, 1 Metrotech Ctr,19th Floor, Brooklyn, NY 11201 USA	10.1016/j.enbuild.2016.06.092	New York City	USA
	2016	Development of a domestic hot water DEMAND prediction model based on a bottom-up approach for RESIDENTIAL ENERGY management systems	An ENERGY management system (EMS) that controls ENERGY equipment in RESIDENTIAL DWELLINGS contributes to ENERGY conservation and cost REDUCTION. A hot ENERGY DEMAND prediction method is necessary for the EMS to provide the best possible performance. A prediction method USING a bottom-up approach based on end-USE analysis with detailed ENERGY CONSUMPTION measurement was developed. One of the advan…	ENERGY DEMAND prediction; Domestic hot water; RESIDENTIAL; ENERGY EFFICIENCY; Combined heat and power; ENERGY management	BUILDINGS; CONSUMPTION; methodology; validation; EFFICIENCY; load	Yes	Confirmed	demand response	district heating and cooling		Applied thermal engineering	J	Article	8	Thermodynamics; Energy & Fuels; Engineering, Mechanical; Mechanics	Aki, H; Wakui, T; Yokoyama, R	[Aki, Hirohisa] Natl Inst Adv Ind Sci & Technol, 1-1-1 Umezono, Tsukuba, Ibaraki 3058568, Japan; [Wakui, Tetsuya; Yokoyama, Ryohei] Osaka Prefecture Univ, Naka Ku, 1-1 Gakuen Cho, Sakai, Osaka 5998531, Japan	10.1016/j.applthermaleng.2016.07.094	Osaka City	Japan
	2016	Understanding electriCITY CONSUMPTION: A comparative contribution of BUILDING factors, socio-demographics, appliances, behaviours and attitudes	This paper tests to what extent different types of variables (BUILDING factors, socio-demographics, appliance ownership and USE, attitudes and self-reported behaviours) explain annualized electriCITY CONSUMPTION in RESIDENTIAL BUILDINGS with gas-FUELled space and water heating. It then shows which individual variables have the highest explanatory power. In contrast to many other studies, the stud…	ElectriCITY DEMAND; RESIDENTIAL BUILDINGS; Socio-demographics; Appliances; Lasso regression; Multicollinearity; English HOMES; Gas-central heating	domestic ENERGY-CONSUMPTION; determinants; uk; HOUSEHOLDS; obesity; DEMAND; children; disease	Yes		consumer behavior	demand response		Applied energy	J	Article	54	Energy & Fuels; Engineering, Chemical	Huebner, G; Shipworth, D; Hamilton, I; Chalabi, Z; Oreszczyn, T	[Huebner, Gesche; Shipworth, David; Hamilton, Ian; Oreszczyn, Tadj] UCL Energy Inst, 14 Upper Woburn Pl, London WC1H 0AE, England; [Chalabi, Zaid] London Sch Hyg & Trop Med, 15-17 Tavistock Pl, London WC1H 9SH, England	10.1016/j.apenergy.2016.04.075		United Kingdom
	2016	Feature extrACTION and filtering for HOUSEHOLD classification based on smart electriCITY meter data	Knowing HOUSEHOLD properties, such as number of persons per apartment, age of HOUSING, type of water heating, etc. enables ENERGY consultants and utilities to develop targeted ENERGY conservation services. Load profiles captured by smart power meters, can-besides several other applications-be USED to reveal ENERGY EFFICIENCY relevant HOUSEHOLD characteristics. The goal of this work is to develop …	Smart meter data (SMD); HOUSEHOLD classification; Supervised MACHINE LEARNING; Feature selection (FS); Feature filtering; Extended CLASS (eCLASS)	feature-selection	Yes	Confirmed	Modeling method contribution	district heating and cooling		Computer science-research and development	J	Article	7	Computer Science, Hardware & Architecture	Hopf, K; Sodenkamp, M; Kozlovkiy, I; Staake, T	[Hopf, Konstantin; Sodenkamp, Mariya; Kozlovkiy, Ilya; Staake, Thorsten] Univ Bamberg, Energy Efficient Syst Grp, D-96047 Bamberg, Germany	10.1007/s00450-014-0294-4
	2016	Development of a web based ENERGY management system for University CampUSES: The CAMP-IT platform	University campUSES can be considered as small TOWNS due to their size, number of USERS and mixed and complex activities, including numerous ACTIONS USUALLY met in URBAN environments. The ENERGY and environmental impact of universities could be considerably REDUCED by applying organizational, technological and ENERGY optimization measures. The aim of the present paper is to present an efficient w…	University campus; Indoor outdoor modelling; Prediction of ENERGY loads; IT infrastructure; ENERGY EFFICIENCY	artificial neural-networks; heat-transfer coefficients; genetic algorithms; environmental-management; microCLIMATE; prediction; BUILDINGS; model; optimization; CONSUMPTION	Yes		building-level			Energy and buildings	J	Article	25	Construction & Building Technology; Energy & Fuels; Engineering, Civil	Kolokotsa, D; Gobakis, K; Papantoniou, S; Georgatou, C; Kampelis, N; Kalaitzakis, K; Vasilakopoulou, K; Santamouris, M	[Kolokotsa, Dionysia; Gobakis, Kostas; Papantoniou, S.; Georgatou, C.; Kampelis, N.; Kalaitzakis, Kostas; Vasilakopoulou, K.; Santamouris, Mat] Tech Univ Crete, Energy Management Built Environm Res Lab, Environm Engn Sch, Tech Univ Campus, GR-73100 Kounoupidiana, Chania, Greece; [Vasilakopoulou, K.; Santamouris, Mat] Univ Athens, Dept Phys, Div Appl Phys, Grp Bldg Environm Phys, Athens 15784, Gre…	10.1016/j.enbuild.2016.04.038	Crete	Greece
	2016	Understanding the spectrum of RESIDENTIAL ENERGY-SAVING behaviours: French evidence USING disaggregated data	Analysing HOUSEHOLD ENERGY-SAVING behaviours is crucial to improve ENERGY CONSUMPTION predictions and ENERGY POLICY making. How should we quantitatively measure them? What are their determinants? This study explores the main factors influencing RESIDENTIAL ENERGY-SAVING behaviours based on a bottom-up multivariate statistical approach USING data from the recent French PHEBUS survey. Firstly, we a…	ENERGY-SAVING behaviours; RESIDENTIAL ENERGY USE; Econometric modelling; IRT; Lasso	nonconcave penalized likelihood; CONSUMPTION; determinants; HOUSEHOLDS; EFFICIENCY; DEMAND	Yes		consumer behavior			Energy economics	J	Article	19	Economics	Belaid, F; Garcia, T	[Belaid, Fateh; Garcia, Thomas] Sci & Tech Ctr Bldg,84 Ave Jean Jaures, F-77447 Marne La Vallee, France; [Garcia, Thomas] Univ Lyon, F-69007 Lyon, France; [Garcia, Thomas] CNRS, GATE Lyon St Etienne, F-69130 Ecully, France	10.1016/j.eneco.2016.05.006		France
	2016	Online identification of appliances from power CONSUMPTION data collected by smart meters	The efficient USE of resources is a matter of great concern in today's society, especially in the ENERGY sector. Although the main strategy to decrease ENERGY USE has long been focUSED on supply, over the last few years, there has been a shift to the DEMAND side. Under this new line of ACTION, DEMAND-side management networks have emerged and extended from the HOUSEHOLD level to larger installatio…	Smart meter; Power CONSUMPTION; Big data; MACHINE LEARNING; Supervised classification; ENERGY EFFICIENCY	classification; similarity	Yes	Confirmed	demand response	appliance efficiency		Pattern analysis and applications	J	Article	3	Computer Science, Artificial Intelligence	Fernandez, MR; Alonso, IG; Casanova, EZ	[Rodriguez Fernandez, M.; Zalama Casanova, E.] Univ Valladolid, Valladolid, Spain; [Gonzalez Alonso, I.] Univ Oviedo, Oviedo, Asturias, Spain	10.1007/s10044-015-0487-x
	2016	Economic conditions for the development of ENERGY efficient civil engineering USING RES in the POLICY of cohesion of the European Union (2014-2020). Case study: The TOWN of Zielona Gora	The objective of this article is to find a way to pursue optimum spatial POLICY on the local level to meet the assumptions of the ENERGY POLICY of the European Union. Factors influencing changes in the ENERGY EFFICIENCY of selected BUILDINGS were modeled USING logic based on radial NEURAL NETWORKS. An attempt was made to economically jUSTIFY the future of ENERGY efficient civil engineering on the…	ENERGY EFFICIENCY; Civil engineering; ENERGY effectiveness; Local POLICY; Structural funds; Renewable ENERGY sources	RESIDENTIAL BUILDINGS; CONSUMPTION; system; photovoltaics; retrofit; model	Yes		Multi-stakeholder planning process			Energy and buildings	J	Article	10	Construction & Building Technology; Energy & Fuels; Engineering, Civil	Bazan-Krzywoszanska, A; Mrowczynska, M; Skiba, M; Laczak, A	[Bazan-Krzywoszanska, Anna; Mrowczynska, Maria; Skiba, Marta] Univ Zielona Gora, Fac Civil Engn Architecture & Environm Engn, Ul Licealna 9, PL-65417 Zielona Gora, Poland; [Laczak, Andrzej] State Sch Higher Profess Educ Sulechow, Inst Law & Tourism, Ul Armii Krajowej 51, PL-66100 Sulechow, Poland	10.1016/j.enbuild.2016.02.048	Zielona Góra	Poland
	2016	A hybrid model approach for forecasting future RESIDENTIAL electriCITY CONSUMPTION	URBAN ENERGY management nowadays has put more focus on RESIDENTIAL HOUSES ENERGY CONSUMPTION. Lots of MACHINE LEARNING based data-driven approaches have the abilities to characterize and forecast total ENERGY CONSUMPTION of commercial data. However, a pauCITY of research applying data-driven methods have been tested on the hour ahead ENERGY CONSUMPTION forecast for typical single family HOUSES in…	Load forecasting; Data-driven model; Thermal network; RESIDENTIAL HOUSES	ENERGY-CONSUMPTION; load prediction; box model; performance; network	Yes		building-level			Energy and buildings	J	Article	36	Construction & Building Technology; Energy & Fuels; Engineering, Civil	Dong, B; Li, ZX; Rahman, SMM; Vega, R	[Dong, Bing; Li, Zhaoxuan; Rahman, S. M. Mahbobur] Univ Texas San Antonio, Dept Mech Engn, San Antonio, TX USA; [Vega, Rolando] Univ Texas San Antonio, Texas Sustainable Energy Res Inst, San Antonio, TX USA	10.1016/j.enbuild.2015.09.033	San Antonio	USA
	2016	Unraveling electriCITY CONSUMPTION profiles in HOUSEHOLDS through clUSTERS: Combining smart meters and door-to-door surveys	Improvements of ENERGY EFFICIENCY and REDUCTION of ElectriCITY CONSUMPTION (EC) could be pUSHED by increased knowledge on CONSUMPTION profiles. This paper contributes to a comprehensive understanding of the EC profiles in a Southwest European CITY through the combination of high-resolution data from smart meters (daily electriCITY CONSUMPTION) with door-to-door 110-question surveys for a sample o…	Daily electriCITY CONSUMPTION; HIERARCHICAL CLUSTERING; Consumers' segmentation; Smart meters; HOUSEHOLD surveys; ElectriCITY DEMAND management	ENERGY-CONSUMPTION; FUEL poverty; load profile; DEMAND; determinants	Yes		retrofit envelope	operational efficiency	consumer behavior	Energy and buildings	J	Article	39	Construction & Building Technology; Energy & Fuels; Engineering, Civil	Gouveia, JP; Seixas, J	[Gouveia, Joao Pedro; Seixas, Julia] Univ Nova Lisboa, Fac Sci & Technol, Dept Sci & Environm Engn, CENSE Ctr Environm & Sustainabil Res, Campus Caparica, P-2829516 Caparica, Portugal	10.1016/j.enbuild.2016.01.043	Évora	Portugal
	2016	A novel time-of-USE tariff design based on GAUSSIAN MIXTURE Model	This paper proposes a novel method to design feasible Time-of-USE (ToU) tariffs for domestic cUSTOMERS from flat rate tariffs by clUSTERING techniques. The method is dedicated to designing the fundamental window patterns of ToU tariffs rather than optimising exact prices for each SETTLEMENT period. It makes USE of GAUSSIAN MIXTURE Model clUSTERING technique to group half-hour interval flat rate t…	Time-of-USE tariff; ClUSTERING; DEMAND response; Benefit quantification; ENERGY storage	electriCITY; retailers	Yes		demand response			Applied energy	J	Article	35	Energy & Fuels; Engineering, Chemical	Li, R; Wang, ZM; Gu, CH; Li, FR; Wu, H	[Li, Ran; Gu, Chenghong; Li, Furong] Univ Bath, Bath BA2 7AY, Avon, England; [Wang, Zhimin] China State Grid Jibei Elect Econ Res Inst, Beijing 100045, Peoples R China; [Wu, Hao] Zhejiang Univ, Hangzhou 310027, Zhejiang, Peoples R China	10.1016/j.apenergy.2015.02.063		United Kingdom
	2016	Linear Model Optimizer vs NEURAL NETWORKS: a Comparison for Improving the Quality and SAVING of LED-Lighting Control Systems	Lighting systems represents about 38% of the total ENERGY CONSUMPTION in office BUILDINGS, however, a great amount of this ENERGY is wasted becaUSE luminaires keep working at its maximum power even when jUST a single person is present. In order to improve the performance of LED-Lighting control systems, we propose a linear model that considers the luminaire's influence on its NEIGHBORHOOD and tak…			Yes		appliance efficiency			2016 23rd international conference on pattern recognition (icpr)	S	Proceedings Paper	0	Computer Science, Artificial Intelligence	Lobato-Rios, V; Hernandez-Castanon, VD; Carrasco-Ochoa, JA; Martinez-Trinidad, JF	[Lobato-Rios, Victor; del Rocio Hernandez-Castanon, Viviana; Ariel Carrasco-Ochoa, Jesus; Francisco Martinez-Trinidad, Jose] Inst Nacl Astrofis Opt & Electr, Comp Sci Dept, Puebla, Mexico	10.1109/ICPR.2016.7900037
	2016	An analysis of indoor temperature measurements in low- and very-low-income HOUSING in Athens, Greece	FUEL poverty is a complex socioeconomic problem that affects low-income HOUSEHOLDS and has a serious impact on indoor environmental quality. In this research, indoor temperatures were measured in 50 low-and very-low-income DWELLINGS in the major Athens area in Greece during the winter of 2012-2013. Initially, k-means clUSTERING was employed to group the HOUSEHOLDS into three clUSTERS (Poorest, Av…	indoor temperature; low-income HOUSEHOLDS; FUEL poverty; ENERGY CONSUMPTION; time series; panel data	RESIDENTIAL sector; thermal comfort; FUEL poverty; cold HOMES; ENERGY; england; winter; improvements; HOUSEHOLDS; DWELLINGS	Yes		retrofit envelope	operational efficiency	consumer behavior	Advances in building energy research	J	Article	4	Construction & Building Technology	Paravantis, JA; Santamouris, M	[Paravantis, John A.] Univ Piraeus, Dept Int & European Studies, Piraeus 18534, Greece; [Santamouris, Mathew] Univ Athens, Dept Phys, Athens, Greece	10.1080/17512549.2015.1014842	Athens	Greece
	2016	Modelling changes in the ENERGY EFFICIENCY of BUILDINGS USING NEURAL NETWORKS on the example of Zielona Gora	The objective of this article is to find a way to pursue optimum spatial POLICY on the local level to meet the assumptions of the ENERGY POLICY of the European Union. One of the possible ways of developing ENERGY efficient civil engineering is varied TOWN POLICY and programmes supporting ENERGY efficient BUILDINGS. And the second is the USE of renewable ENERGY sources as a factor improving the EN…		CITIES; poverty; systems; panels; zero; res	Yes		Multi-stakeholder planning process			1st international conference on the sustainable energy and environment development (seed 2016)	S	Proceedings Paper	0	Green & Sustainable Science & Technology; Energy & Fuels; Engineering, Environmental	Laczak, A; Mrowczynska, M; Bazan-Krzywoszanska, A; Skiba, M	[Laczak, Andrzej] State Sch Higher Profess Educ Sulechow, Inst Law & Tourism, Armii Krajowej 51, PL-66100 Sulechow, Poland; [Mrowczynska, Maria; Bazan-Krzywoszanska, Anna; Skiba, Marta] Univ Zielona Gora, Fac Civil Engn Architecture & Environm Engn, Licealna 9, PL-65417 Zielona Gora, Poland	10.1051/e3sconf/20161000061	Zielona Góra	Poland
	2016	Analysis, Operation and Development of an RES Integrated URBAN ENERGY System	This paper investigates how renewable resources can be exploited to overcome the power shortage and produce a significant amount of the ENERGY DEMAND from the most feasible renewable sources in Bangladesh. USING two ENERGY system analysis softwares, HOMER which specializes in optimizing ENERGY systems and ENERGYPLAN which focUSES on larger regions, a strong smart CITY model has been presented whi…	Renewable Resources; HOMER; ENERGYPLAN; Smart CITY; ANN-based Forecaster	renewable ENERGY	Yes	Confirmed	demand response	CO2 emission/energy consumption prediction		2016 5th international conference on informatics, electronics and vision (iciev)	B	Proceedings Paper	1	Engineering, Electrical & Electronic; Optics	Choudhury, F; Ahmad, SY; Nawar, KA; Maruf, MNI; Majumder, R	[Choudhury, Farhana] AIUB, Fac Engn, Dept EEE, Dhaka, Bangladesh	10.1109/ICIEV.2016.7760004	Khulna	Bangladesh
	2016	Model estimation of ARMA USING genetic algorithms: A case study of forecasting natural gas CONSUMPTION	ENERGY is accepted as a vital strategic issue all over the world due to the important hesitations/concerns about ENERGY reliability, sUSTAINABILITY and affordability. The future of the any country's economy entirely depends on ENERGY becaUSE it is the major input and indispensable resource for all sectors. Particularly, natural gas is a common USED ENERGY source for electriCITY generation, heatin…	Natural gas CONSUMPTION; forecasting; genetic algorithms; ARMA	neural-networks; DEMAND; arima; turkey; system	Yes		CO2 emission/energy consumption prediction			12th international strategic management conference, ismc 2016	S	Proceedings Paper	13	Business; Management	Ervural, BC; Beyca, OF; Zaim, S	[Ervural, Beyzanur Cayir; Beyca, Omer Faruk; Zaim, Selim] Istanbul Tech Univ, TR-34357 Istanbul, Turkey	10.1016/j.sbspro.2016.11.066	Istanbul	Turkey
	2016	ON-LINE EARLY FAULT DETECTION OF A CENTRIFUGAL CHILLER BASED ON DATA DRIVEN APPROACH	A DISTRICT COOLING system (DCS) is a system that distributes thermal ENERGY through chilled water from a central source to RESIDENTIAL, commercial, or indUSTRIAL consumers, designated to air conditioning purposes. It is one of the most important part of a heating, ventilation, air conditioning and refrigeration systems (HVAC), becaUSE a DCS is composed of: Cooling TOWERS, central chiller plant, w…		principal-component analysis; BAYESIAN NETWORK classifiers; means clUSTERING-algorithm; k-means; quantitative model; diagnosis; systems; pca	Yes		district heating and cooling			Proceedings of the asme 10th international conference on energy sustainability, 2016, vol 1	B	Proceedings Paper	0	Green & Sustainable Science & Technology; Energy & Fuels; Engineering, Mechanical	Duran, CA; Sanjuan, ME	[Audivet Duran, Cinthia; Sanjuan, Marco E.] Univ Norte, Barranquilla, Colombia	10.1115/ES2016-59291
	2016	A Comparative Study of Centralized and Decentralized Active Power Control in RESIDENTIAL ENERGY DISTRICTS	In this paper, a decentralized voltage control service for the distribution system operator (DSO) is proposed and a comparison with a centralized strategy, such as the conservation voltage control (CVR) technique is presented. The service is designed to provide short term power reserve to the grid and it implements a local voltage-led DEMAND response. The proposed service manages RESIDENTIAL unit…	DEMAND response; voltage control; LV distribution grid		Yes		demand response			2016 ieee 16th international conference on environment and electrical engineering (eeeic)	B	Proceedings Paper	0	Green & Sustainable Science & Technology; Engineering, Electrical & Electronic	Santoro, P; Calderaro, V; Galdi, V; Piccolo, A	[Santoro, P.; Calderaro, V-; Galdi, V.; Piccolo, A.] Univ Salerno, Dept Ind Engn, I-84084 Fisciano, SA, Italy	10.1109/EEEIC.2016.7555672
	2016	Experimental Validation of the DEMAND Response Potential of RESIDENTIAL Heating Systems	To effectively exploit the potential of DEMAND response, knowledge regarding the availability of flexibility is crucial. In this paper, the flexibility of RESIDENTIAL heating systems is assessed USING the results of the Dutch smart grid pilot PowerMatching CITY. Within this pilot a multi-objective multi-agent system is USED to exploit the flexibility of RESIDENTIAL heat pumps and micro-CHPs. To v…	Artificial NEURAL NETWORKS; Data-Driven Flexibility Analysis; DEMAND Response; Multi-Agent Systems; Multiple Regression		Yes		demand response	district heating and cooling	CO2 emission/energy consumption prediction	2016 power systems computation conference (pscc)	B	Proceedings Paper	0	Energy & Fuels; Engineering, Electrical & Electronic	Klaassen, EAM; Frunt, J; Slootweg, JG	[Klaassen, E. A. M.; Frunt, J.; Slootweg, J. G.] Eindhoven Univ Technol, Elect Energy Syst Grp, Eindhoven, Netherlands; [Klaassen, E. A. M.; Slootweg, J. G.] Enexis BV, Shertogenbosch, Netherlands; [Frunt, J.] DNV GL Energy, Arnhem, Netherlands	10.1109/PSCC.2016.7540825
	2016	Dynamic type-cohort-time approach for the analysis of ENERGY REDUCTIONS strategies in the BUILDING stock	While many countries have set ambitious targets for REDUCING ENERGY USE and GHG (GREENHOUSE GAS) emissions, it remains highly uncertain whether the POLICIES introduced will be suitable to reach these targets at the specified times. Models USED to inform BUILDING POLICIES often do not account for the different boundary conditions related to socio-economic development, CLIMATE, composition and age …	Type-Cohort-Time TCT; Stock dynamics; Dynamic material flow analysis MFA; Nearly zero ENERGY BUILDINGS NZEB; Renovation; Vacancy; Germany; Czech Republic; RESIDENTIAL sector; BUILDING stock	material flow-analysis; long-term; RESIDENTIAL BUILDINGS; co2 emissions; heating ENERGY; DWELLING stock; neural-network; CONSUMPTION; model; sector	Yes		retrofit envelope	consumer behavior		Energy and buildings	J	Article	25	Construction & Building Technology; Energy & Fuels; Engineering, Civil	Vasquez, F; Lovik, AN; Sandberg, NH; Muller, DB	[Vasquez, Felipe; Lovik, Amund N.; Sandberg, Nina Holck; Muller, Daniel B.] Norwegian Univ Sci & Technol NTNU, Dept Energy & Proc Engn, Ind Ecol Programme, N-7491 Trondheim, Norway	10.1016/j.enbuild.2015.11.018		Germany, Czech Republic
	2016	Distribution Network Voltage Control for Peak Load Alleviation	This paper presents a methodology for alleviating peak DEMAND USING distribution network voltage control and tests the developed methodology USING a comprehensive high-resolution bottom-up low-voltage closed-loop RESIDENTIAL time-variant load modeling platform. The load model USED is capable of capturing the time-variant voltage dependency of the load and the voltage response of closed-loop loads…	DEMAND response; distribution networks; load modeling; load-flow; peak load; RESIDENTIAL load sector; smart grids; voltage strategies	DEMAND response	Yes		demand response			2016 ieee international conference on power system technology (powercon)	B	Proceedings Paper	0	Energy & Fuels; Engineering, Electrical & Electronic	McKenna, K; Keane, A	[McKenna, Killian; Keane, Andrew] Univ Coll Dublin, Elect Res Ctr, Sch Elect & Elect Engn, Dublin, Ireland
	2016	Load Forecasting at Distribution Transformer USING IoT based Smart Meter Data from 6000 Irish HOMES	ENERGY CONSUMPTION in a NEIGHBORHOOD depends upon its socioeconomic parameters. Demographical diversities in a NEIGHBORHOOD in India warrants load prediction at distribution transformer (DT) rather than at utility level. In this paper two interesting techniques of load forecasting have been proposed which have not be explored till date. In both these technique a unique pattern of CONSUMPTION has …			Yes		building-level			Proceedings of the 2016 2nd international conference on contemporary computing and informatics (ic3i)	B	Proceedings Paper	0	Computer Science, Information Systems; Computer Science, Theory & Methods	Singh, MJ; Agarwal, P; Padmanabh, K	[Singh, Mantinder Jit; Agarwal, Prakhar] Birla Inst Technol & Sci, Pilani 333031, Rajasthan, India; [Padmanabh, Kumar] Robert Bosch India, Res & Technol Ctr, Bangalore 560095, Karnataka, India			India
	2015	Development and application of a simple BEMS to measure ENERGY CONSUMPTION of BUILDINGS	This paper shows development of a simple, cheap "BUILDING ENERGY Management System" (BEMS) to monitor ENERGY CONSUMPTION, and an application to measure ENERGY CONSUMPTION, including electriCITY and gas CONSUMPTION in BUILDINGS. The system USES current transformers to measure electric CONSUMPTION at each distribution box. Web cameras monitor lighting in each room, as well as air conditioning statu…	BUILDINGS; Simple BEMS; ENERGY CONSUMPTION; Air conditioning; Lighting; Carbon dioxide emissions		Yes		building-level			Energy and buildings	J	Article	13	Construction & Building Technology; Energy & Fuels; Engineering, Civil	Yuan, J; Farnham, C; Emura, K	[Yuan, J.; Farnham, C.; Emura, K.] Osaka City Univ, Sumiyoshi Ku, Osaka 5588585, Japan	10.1016/j.enbuild.2015.10.012	Osaka City	Japan
	2015	Comparison of integrated clUSTERING methods for accurate and stable prediction of BUILDING ENERGY CONSUMPTION data	ClUSTERING methods are often USED to model ENERGY CONSUMPTION for two reasons. First, clUSTERING is often USED to process data and to improve the predictive accuracy of subsequent ENERGY models. Second, stable clUSTERS that are reproducible with respect to non-essential changes can be USED to group, target, and interpret observed subjects. However, it is well known that clUSTERING methods are hig…	ClUSTER-wise regression; BUILDINGS; ENERGY CONSUMPTION; Prediction accuracy; ClUSTER stability; Latent class regression	maximum-likelihood; variables; performance; algorithm; selection; systems; models	Yes		building-level	CO2 emission/energy consumption prediction		Applied energy	J	Article	57	Energy & Fuels; Engineering, Chemical	Hsu, D	[Hsu, David] MIT, Dept Urban Studies & Planning, Cambridge, MA 02139 USA	10.1016/j.apenergy.2015.08.126	New York City	USA
	2015	Analysis of HOUSEHOLD electriCITY CONSUMPTION behaviours: Impact of domestic electriCITY generation	Adoption of renewable electriCITY generation technologies such as photovoltaic (PV) systems is at the early majority stage in most developed countries. Depending on solar capaCITY, applied feed-in tariff, and other factors, HOUSEHOLDS exhibit different electriCITY CONSUMPTION behaviours which can potentially assist in DEMAND Side Management (DSM) of electriCITY USAGE. This article presents three …	DEMAND side management; Renewables; Rooftop solar electriCITY; Domestic electriCITY Generation; Rebound effect; Self-CONSUMPTION	PRINCIPAL COMPONENT ANALYSIS; ENERGY-CONSUMPTION; photovoltaic power; self-CONSUMPTION; DEMAND; patterns; time; DWELLINGS; system	Yes		consumer behavior			Applied mathematics and computation	J	Article	14	Mathematics, Applied	Motlagh, O; Paevere, P; Hong, TS; Grozev, G	[Motlagh, Omid; Paevere, Phillip; Grozev, George] CSIRO Land & Water, Highett, Vic 3190, Australia; [Hong, Tang Sai] Univ Putra Malaysia, Fac Engn, Mech & Mfg, Serdang 43400, Malaysia	10.1016/j.amc.2015.08.029		Australia
	2015	Forecasting Hot Water CONSUMPTION in RESIDENTIAL HOUSES	An increased number of intermittent renewables poses a threat to the system balance. As a result, new tools and concepts, like advanced DEMAND-side management and smart grid technologies, are required for the DEMAND to meet supply. There is a need for higher consumer awareness and automatic response to a shortage or surplus of electriCITY. The distributed water heater can be considered as one of …	hot water CONSUMPTION; forecasting techniques; smart grid; DEMAND-side management	DEMAND-side management; renewable ENERGY; neural-network; storage; generation; grids	Yes		building-level			Energies	J	Article	13	Energy & Fuels	Gelazanskas, L; Gamage, KAA	[Gelazanskas, Linas; Gamage, Kelum A. A.] Univ Lancaster, Dept Engn, Lancaster LA1 4YW, England	10.3390/en81112336
	2015	Intelligent forecasting of RESIDENTIAL heating DEMAND for the DISTRICT HEATING System based on the monthly overall natural gas CONSUMPTION	In this study, the RESIDENTIAL heating DEMAND of a case study (Baharestan TOWN, Karaj) in Iran was forecasted based on the monthly natural gas CONSUMPTION data and monthly average of the ambient temperature. Three various methods containing EXTREME LEARNING MACHINE (ELM), artificial NEURAL NETWORKS (ANNs) and genetic programming (GP) were employed to forecast RESIDENTIAL heating DEMAND of the cas…	RESIDENTIAL natural gas DEMAND; DISTRICT HEATING System (DHS); Estimation; Computational models; ENERGY CONSUMPTION	extreme learning-machine; artificial neural-networks; BUILDING ENERGY-CONSUMPTION; feedforward networks; prediction; optimization; algorithm	Yes		district heating and cooling	CO2 emission/energy consumption prediction		Energy and buildings	J	Article	19	Construction & Building Technology; Energy & Fuels; Engineering, Civil	Izadyar, N; Ong, HC; Shamshirband, S; Ghadamian, H; Tong, CW	[Izadyar, Nima; Ong, Hwai Chyuan; Tong, Chong Wen] Univ Malaya, Fac Engn, Dept Mech Engn, Kuala Lumpur 50603, Malaysia; [Shamshirband, Shahaboddin] Univ Malaya, Fac Comp Sci & Informat Technol, Dept Comp Syst & Informat Technol, Kuala Lumpur 50603, Malaysia; [Ghadamian, Hossein] Mat & Energy Res Ctr, Dept Energy, Tehran, Iran	10.1016/j.enbuild.2015.07.006	Karaj	Iran
	2015	Multivariate statistical monitoring of BUILDINGS. Case study: ENERGY monitoring of a social HOUSING BUILDING	A complete methodology for ENERGY BUILDING monitoring based on PRINCIPAL COMPONENT ANALYSIS (PCA) is proposed. The method extends the Unfolding or Multiway PRINCIPAL COMPONENT ANALYSIS (MPCA) USED in statistical batch process control in terms of BUILDING and NEIGHBOURHOOD monitoring. Relationships between ENERGY CONSUMPTION and independent variables such as weather, occupancy or any other variabl…	PRINCIPAL COMPONENT ANALYSIS; Unfold-PCA; MPCA; BEM; BUILDING ENERGY monitoring; Data mining		Yes		consumer behavior	building-level		Energy and buildings	J	Article	9	Construction & Building Technology; Energy & Fuels; Engineering, Civil	Burgas, L; Melendez, J; Colomer, J; Massana, J; Pous, C	[Burgas, Llorenc; Melendez, Joaquim; Colomer, Joan; Massana, Joaquim; Pous, Carles] Univ Girona, E-17071 Girona, Spain	10.1016/j.enbuild.2015.06.069
	2015	Data-Driven Baseline Estimation of RESIDENTIAL BUILDINGS for DEMAND Response	The advent of advanced metering infrastructure (AMI) generates a large volume of data related with ENERGY service. This paper exploits data mining approach for cUSTOMER baseline load (CBL) estimation in DEMAND response (DR) management. CBL plays a significant role in measurement and verification process, which quantifies the amount of DEMAND REDUCTION and authenticates the performance. The propos…	DEMAND response (DR) management; analytics for ENERGY data; data mining; RESIDENTIAL BUILDINGS; smart meters; cUSTOMER baseline load	electriCITY load; temperature	Yes		demand response			Energies	J	Article	16	Energy & Fuels	Park, S; Ryu, S; Choi, Y; Kim, J; Kim, H	[Park, Saehong; Ryu, Seunghyoung; Choi, Yohwan; Kim, Hongseok] Sogang Univ, Dept Elect Engn, Seoul 121742, South Korea; [Kim, Jihyo] Omni Syst Co Ltd, Seoul 133822, South Korea	10.3390/en80910239	Seoul, Daejon, Gwuang-ju	South Korea
	2015	Artificial NEURAL NETWORKING model for the prediction of high EFFICIENCY boiler steam generation and distribution	Development of artificial NEURAL NETWORK (ANN) models USING real plant data for the prediction of fresh steam properties from a brown coal-fired boiler of a Slovenian power plant. The power plant generates electrical and thermal ENERGY USED for the CITY-wide DISTRICT HEATING. The ENERGY is produced in three blocks. Each block consists of a coal-fired boiler and an extrACTION condensing steam turb…	Prediction of production; Boiler EFFICIENCY; Real plant data; Fuzzy logic controller; Matlab; IndUSTRIAL steam	optimization; ENERGY; DEMAND; system	Yes		district heating and cooling			Simulation modelling practice and theory	J	Review	8	Computer Science, Interdisciplinary Applications; Computer Science, Software Engineering	Strusnik, D; Golob, M; Avsec, J	[Strusnik, Dusan; Golob, Marjan; Avsec, Jurij] Energetika Ljubljana Doo, TE TOL Unit, SI-1000 Ljubljana, Slovenia	10.1016/j.simpat.2015.06.003
	2015	Benchmarking whole-BUILDING ENERGY performance with multi-criteria technique for order preference by similarity to ideal solution USING a selective objective-weighting approach	This paper develops a robUST multi-criteria Technique for Order Preference by Similarity to Ideal Solution (TOPSIS) based BUILDING ENERGY EFFICIENCY benchmarking approach. The approach is explicitly selective to address multicollinearity trap due to the subjectivity in selecting ENERGY variables by considering cost-accuracy trade-off. It objectively weights the relative importance of individual p…	Benchmarking; Whole-BUILDING ENERGY performance; Multi-criteria; TOPSIS; Objective-weighting	commercial BUILDINGS; RESIDENTIAL sector; EFFICIENCY; CONSUMPTION; sUSTAINABILITY; management; ranking	Yes		operational efficiency	building-level		Applied energy	J	Article	55	Energy & Fuels; Engineering, Chemical	Wang, ED	Univ Tennessee, Engn Management & Technol Dept, Chattanooga, TN 37403 USA	10.1016/j.apenergy.2015.02.048	Taipei	Taiwan
	2015	Pattern recognition as a tool to support decision making in the management of the electric sector. Part II: A new method based on clUSTERING of multivariate time series	This work presents a new method for the clUSTERING and pattern recognition of multivariate time series (CPT-M) based on multivariate statistics. The algorithm comprises four steps that extract essential features of multivariate time series of RESIDENTIAL USERS with emphasis on seasonal and temporal profile, among others. The method was successfully implemented and tested in the context of an ENER…	ClUSTERING; Pattern; ElectriCITY distribution; Multivariate time series	load profiles; neural-networks; cUSTOMER classification; ENERGY EFFICIENCY; esco indUSTRY; peak load; DEMAND; segmentation; validation; framework	Yes		appliance efficiency	building-level		International journal of electrical power & energy systems	J	Article	6	Engineering, Electrical & Electronic	Ferreira, AMS; Fontes, CHD; Cavalcante, CAMT; Marambio, JES	[Silva Ferreira, Adonias Magdiel; de Oliveira Fontes, Cristiano Hora; Mattos Teixeira Cavalcante, Carlos Arthur] Univ Fed Bahia, Polytech Sch, Program Ind Engn, Salvador, BA, Brazil; [Soto Marambio, Jorge Eduardo] Norsul LTD, Salvador, BA, Brazil	10.1016/j.ijepes.2014.12.001	Algoas	Brazil
	2015	Identifying key variables and interACTIONS in statistical models of BUILDING ENERGY CONSUMPTION USING regularization	Statistical models can only be as good as the data put into them. Data about ENERGY CONSUMPTION continues to grow, particularly its non-technical aspects, but these variables are often interpreted differently among disciplines, datasets, and contexts. Selecting key variables and interACTIONS is therefore an important step in achieving more accurate predictions, better interpretation, and identifi…	ENERGY CONSUMPTION; BUILDINGS; Variable selection; Statistical models	multivariate-analysis; regression shrinkage; simulation programs; RESIDENTIAL sector; stock models; selection; lasso; uncertainty; performance; calibration	Yes		Modeling method contribution	building-level		Energy	J	Article	37	Thermodynamics; Energy & Fuels	Hsu, D		10.1016/j.energy.2015.02.008	New York City	USA
	2015	Appraisal of soft computing methods for short term consumers' heat load prediction in DISTRICT HEATING systems	DISTRICT HEATING systems can play a significant role in achieving stringent targets for CO2 emissions with concurrent increase in FUEL EFFICIENCY. However, there are numerous possibilities for future improvement of their operation. One of the potential domains is control, where short-term prediction of heat load can play a significant role. With reliable prediction of consumers' heat CONSUMPTION,…	DISTRICT HEATING systems; Heat load; Prediction; SVR	SUPPORT VECTOR REGRESSION; time-series prediction; models	Yes		district heating and cooling	building-level		Energy	J	Article	19	Thermodynamics; Energy & Fuels	Protic, M; Shamshirband, S; Anisi, MH; Petkovic, D; Mitic, D; Raos, M; Arif, M; Alam, KA	[Protic, Milan; Mitic, Dragan; Raos, Miomir] Univ Nis, Fac Occupat Safety, Nish 18000, Serbia; [Petkovic, Dalibor] Univ Nis, Fac Mech Engn, Dept Mech & Control, Nish 18000, Serbia; [Shamshirband, Shahaboddin; Anisi, Mohammad Hossein; Arif, Muhammad] Univ Malaya, Fac Comp Sci & Informat Technol, Dept Comp Syst & Technol, Kuala Lumpur 50603, Malaysia; [Alam, Khubaib Amjad] Univ Malaya, Fac Comp Sci…	10.1016/j.energy.2015.01.079	Niš	Serbia
	2015	Forecasting Hot Water CONSUMPTION in DWELLINGS USING Artificial NEURAL NETWORKS	The electriCITY grid is currently transforming and becoming more and more decentralised. Green ENERGY generation has many incentives throughout the world thus small renewable generation units become popular. Intermittent generation units pose threat to system stability so new balancing techniques like DEMAND Side Management mUST be researched. RESIDENTIAL hot water heaters are perfect candidates …	Hot Water CONSUMPTION; Forecasting; Artificial NEURAL NETWORKS; Smart Grid; DEMAND Side Management	DEMAND-side management; storage	Yes		demand response	building-level		2015 ieee 5th international conference on power engineering, energy and electrical drives (powereng)	B	Proceedings Paper	3	Energy & Fuels; Engineering, Electrical & Electronic	Gelazanskas, L; Gamage, KAA	[Gelazanskas, Linas; Gamage, Kelum A. A.] Univ Lancaster, Dept Engn, Lancaster, England
	2015	A Context Vector Regression based Approach for DEMAND Forecasting in DISTRICT HEATING Networks	DISTRICT HEATING and cooling systems are becoming increasingly popular to serve the thermal DEMANDS of end consumers. In this paper, we investigate the problem of forecasting DEMAND in DISTRICT HEATING and cooling systems at the individual consumer level. We are driven by applications such as DEMAND response, where understanding baseline CONSUMPTION is required in order to set DEMAND curtailment …	DEMAND forecasting; MACHINE LEARNING algorithms; Smart HOMES		Yes		district heating and cooling	demand response	building-level	2015 ieee innovative smart grid technologies - asia (isgt asia)	B	Proceedings Paper	0	Energy & Fuels; Engineering, Electrical & Electronic	Rongali, S; Choudhury, AR; Chandan, V; Arya, V	[Rongali, Subendhu; Choudhury, Anamitra R.; Chandan, Vikas; Arya, Vijay] IBM Res India, Delhi, India
	2015	Semi-Supervised ENERGY Modeling (SSEM) for BUILDING clUSTERS USING MACHINE LEARNING techniques	There are many data mining and MACHINE LEARNING techniques to manage large sets of complex ENERGY supply and DEMAND data for BUILDING, organization and CITY. As the amount of data continues to grow, new data analysis methods are needed to address the increasing complexity. USING data from the ENERGY loss between the supply (ENERGY production sources) and DEMAND (BUILDINGS and CITIES CONSUMPTION),…	SEMI-SUPERVISED LEARNING; ENERGY Modeling; DEMAND- supply analysis; ENERGY losses; Labelled and Unlabelled factors		Yes		retrofit envelope	operational efficiency		Defining the future of sustainability and resilience in design, engineering and construction	S	Proceedings Paper	2	Green & Sustainable Science & Technology; Engineering, Multidisciplinary	Naganathan, H; Chong, WK; Chen, XW	[Naganathan, Hariharan; Chong, Wai K.] Arizona State Univ, Sch Sustainable Engn & Built Environm, Tempe, AZ 85281 USA; [Chen, Xue-wen] Wayne State Univ, Dept Comp Sci, Detroit, MI 48202 USA	10.1016/j.proeng.2015.08.462
	2015	Comparative Study on MACHINE LEARNING for URBAN BUILDING ENERGY Analysis	There has been an increasing interest in applying MACHINE LEARNING methods in URBAN ENERGY assessment. This research implemented six statistical learning methods in estimating domestic gas and electriCITY USING both physical and socio-economic explanatory variables in London. The input variables include DWELLING types, HOUSEHOLD tenure, HOUSEHOLD composition, council tax band, population age grou…	URBAN BUILDINGS; ENERGY USE; MACHINE LEARNING; Comparative learning; Cross validation		Yes		building-level	operational efficiency		9th international symposium on heating, ventilation and air conditioning (ishvac) joint with the 3rd international conference on building energy and environment (cobee)	S	Proceedings Paper	17	Construction & Building Technology; Engineering, Multidisciplinary	Wei, L; Tian, W; Silva, EA; Choudhary, R; Meng, QX; Yang, S	[Wei, Lai; Tian, Wei; Meng, QingXin; Yang, Song] Tianjin Univ Sci & Technol, Coll Mech Engn, Tianjin, Peoples R China; [Wei, Lai; Tian, Wei; Yang, Song] Tianjin Key Lab Integrated Design & On Line Monit, Tianjin 300222, Peoples R China; [Silva, Elisabete A.] Univ Cambridge, Dept Land Econ, Cambridge, England; [Choudhary, Ruchi] Univ Cambridge, Dept Engn, Cambridge, England	10.1016/j.proeng.2015.08.1070	London	United Kingdom
	2015	Fnergy SAVING in smart HOMES based on consumer behavior: A case study	This paper presents a case study of a recommender system that can be USED to save ENERGY in smart HOMES without lowering the comfort of the inhabitants. We present an algorithm that mines consumer behavior data only and applies MACHINE LEARNING to suggest ACTIONS for inhabitants to REDUCE the ENERGY CONSUMPTION of their HOMES. The system looks for frequent and periodic patterns in the event data …	smart CITIES; smart HOMES; ENERGY SAVING; recommender system; association rules; UNSUPERVISED LEARNING; internet of things; IoT		Yes		consumer behavior			2015 ieee first international smart cities conference (isc2)	B	Proceedings Paper	0	Green & Sustainable Science & Technology; Engineering, Multidisciplinary	Zehnder, M; Wache, H; Witschel, HF; Zanatta, D; Rodriguez, M	[Zehnder, Michael; Wache, Holger; Witschel, Hans-Friedrich] Univ Appl Sci & Arts Northwestern Switzerland, Inst Business Informat Syst, Olten, Switzerland; [Zanatta, Danilo; Rodriguez, Miguel] digitalSTROM AG, Res & Dev, Zurich, Switzerland
	2015	Knowledge-Mining the AUSTRALIAN Smart Grid Smart CITY Data: A Statistical-Neural Approach to DEMAND-Response Analysis	Large scale field trials of smart grid technologies provide important insights as they capture the complex interdependencies of all the key variables, including consumer behaviours, which are needed for their effective evaluation. We present the AUSTRALIAN Smart Grid Smart CITY program and describe its big data USING a narrative approach to hasten understanding and further analyses by others. The…		load	Yes		consumer behavior			Planning support systems and smart cities	S	Proceedings Paper	12	Computer Science, Information Systems; Urban Studies	Motlagh, O; Foliente, G; Grozev, G	[Motlagh, Omid; Foliente, Greg; Grozev, George] CSIRO Land & Water, 37 Graham Rd, Highett, Vic 3190, Australia; [Foliente, Greg] Univ Melbourne, Fac Architecture Bldg & Planning, Melbourne, Vic 3010, Australia	10.1007/978-3-319-18368-8_10	Sidney	Australia
	2015	The Forecasting of the Daily Heat DEMAND of the Public Sector BUILDINGS with DISTRICT HEATING	This study is devoted to the increasing of the heat ENERGY DEMAND forecasting accuracy for DISTRICT HEATING of the public sector BUILDINGS. The authors have analyzed forecasting techniques USED for the heat ENERGY DEMAND forecasting for BUILDINGS with DISTRICT HEATING. The system model for description the forecasting process as a part of the information support of the heat ENERGY management proce…	Forecasting; Heat ENERGY DEMAND; NEURAL NETWORK; Information system; ENERGY management		Yes		district heating and cooling			Information and software technologies, icist 2015	S	Proceedings Paper	2	Computer Science, Information Systems; Computer Science, Interdisciplinary Applications; Computer Science, Software Engineering; Computer Science, Theory & Methods	Parfenenko, Y; Shendryk, V; Vashchenko, S; Fedotova, N	[Parfenenko, Yuliia; Shendryk, Vira; Vashchenko, Svitlana; Fedotova, Natalya] Sumy State Univ, Sumy, Ukraine	10.1007/978-3-319-24770-0_17
	2015	USING consumer behavior data to REDUCE ENERGY CONSUMPTION in smart HOMES Applying MACHINE LEARNING to save ENERGY without lowering comfort of inhabitants	This paper discUSSES how USAGE patterns and preferences of inhabitants can be learned efficiently to allow smart HOMES to autonomoUSLY achieve ENERGY SAVINGS. We propose a frequent sequential pattern mining algorithm suitable for real-life smart HOME event data. The performance of the proposed algorithm is compared to existing algorithms regarding completeness/correctness of the results, run time…	smart CITIES; smart HOMES; ENERGY SAVING; recommender systems; association rules; UNSUPERVISED LEARNING; internet of things	pattern	Yes		operational efficiency	appliance efficiency		2015 ieee 14th international conference on machine learning and applications (icmla)	B	Proceedings Paper	14	Computer Science, Cybernetics	Schweizer, D; Zehnder, M; Wache, H; Witschel, HF; Zanatta, D; Rodriguez, M	[Schweizer, Daniel; Zehnder, Michael; Wache, Holger; Witschel, Hans-Friedrich] Univ Appl Sci & Arts Northwestern Switzerland, FHNW, Inst Business Informat Syst, Olten, Switzerland; [Zanatta, Danilo; Rodriguez, Miguel] DigitalSTROM AG, Res & Dev, Zurich, Switzerland	10.1109/ICMLA.2015.62
	2014	Revealing HOUSEHOLD characteristics from smart meter data	Utilities are currently deploying smart electriCITY meters in millions of HOUSEHOLDS worldwide to collect fine-grained electriCITY CONSUMPTION data. We present an approach to automatically analyzing this data to enable personalized and scalable ENERGY EFFICIENCY programs for private HOUSEHOLDS. In particular, we develop and evaluate a system that USES supervised MACHINE LEARNING techniques to aut…	Data-driven ENERGY EFFICIENCY; Domestic electriCITY CONSUMPTION; ElectriCITY load profiles; Automated cUSTOMER segmentation; Supervised MACHINE LEARNING	social norms; ENERGY; CONSUMPTION	Yes		consumer behavior	appliance efficiency		Energy	J	Article	80	Thermodynamics; Energy & Fuels	Beckel, C; Sadamori, L; Staake, T; Santini, S	[Beckel, Christian; Sadamori, Leyna] ETH, Inst Pervas Comp, Dept Comp Sci, CH-8092 Zurich, Switzerland; [Staake, Thorsten] Univ Bamberg, Energy Efficient Syst Grp, D-96047 Bamberg, Germany; [Santini, Silvia] Tech Univ Darmstadt, Wireless Sensor Networks Lab, D-64283 Darmstadt, Germany	10.1016/j.energy.2014.10.025		Ireland
	2014	Statistical analysis of ENERGY CONSUMPTION patterns on the heat DEMAND of BUILDINGS in DISTRICT HEATING systems	Precise prediction of heat DEMAND is crucial for optimising DISTRICT HEATING (DH) systems. ENERGY CONSUMPTION patterns (ECPs) represent a key parameter in developing a good mathematical model to predict heat DEMAND. This study quantitatively investigated the impacts of ECPs on heat CONSUMPTION. Two key factors, namely, time and type of BUILDINGS, were USED to reflect various ECPs in DH systems, a…	DISTRICT HEATING (DH); Heat DEMAND; GAUSSIAN MIXTURE model (GMM); ENERGY CONSUMPTION pattern (ECP)	simulation-model; cooling load; prediction; networks	Yes		district heating and cooling	building-level		Energy and buildings	J	Article	31	Construction & Building Technology; Energy & Fuels; Engineering, Civil	Ma, ZY; Li, HL; Sun, Q; Wang, C; Yan, AB; Starfelt, F	[Ma, Zhanyu] Beijing Univ Posts & Telecommun, Pattern Recognit & Intelligent Syst Lab, Beijing 100088, Peoples R China; [Li, Hailong; Starfelt, Fredrik] Malardalen Univ, Sch Business Soc & Energy, Eskilstuna, Sweden; [Sun, Qie] Shandong Univ, Inst Thermal Sci & Technol, Jinan 250100, Peoples R China; [Wang, Chao] Tongji Univ, Sch Elect & Informat Engn, Shanghai 200092, Peoples R China; [Yan, Aibi…	10.1016/j.enbuild.2014.09.048	Shandong	China
	2014	Application of NEURAL NETWORKS in predicting airtightness of RESIDENTIAL units	The paper describes the need to investigate airtightness of existing RESIDENTIAL units in order to achieve adequate ENERGY EFFICIENCY. There is a brief explanation of the blower door method USED in field testing of airtightness in RESIDENTIAL units. The mentioned method was USED to create a database of airtightness test results obtained in situ at 58 RESIDENTIAL units in the local area. The analy…	Airtightness; RESIDENTIAL units; NEURAL NETWORKS	ENERGY performance; air-tightness; HOUSES; DWELLINGS; leakage	Yes		building-level			Energy and buildings	J	Article	11	Construction & Building Technology; Energy & Fuels; Engineering, Civil	Krstic, H; Koski, Z; Otkovic, II; Spanic, M	[Krstic, Hrvoje; Koski, Zeljko; Otkovic, Irena Istoka; Spanic, Martina] Univ Osijek, Fac Civil Engn Osijek, HR-31000 Osijek, Croatia	10.1016/j.enbuild.2014.08.007	Osijek	Croatia
	2014	An augmented multi-objective particle swarm optimizer for BUILDING clUSTER operation decisions	It is envisioned that other than the grid-BUILDING communication, the smart BUILDINGS could potentially treat connected NEIGHBORHOOD BUILDINGS as a local buffer thus forming a local area ENERGY network through the smart grid. As the hardware technology is in place, what is needed is an intelligent algorithm that coordinates a clUSTER of BUILDINGS to obtain Pareto decisions on short time scale ope…	Particle swarm optimization; Multi-objective optimization; Pareto optimality; Smart grid; Smart BUILDING	REINFORCEMENT LEARNING control; multiple objectives; genetic algorithm; combined heat; search; convergence; variant	Yes		operational efficiency			Applied soft computing	J	Article	25	Computer Science, Artificial Intelligence; Computer Science, Interdisciplinary Applications	Hu, MQ; Weir, JD; Wu, T	[Hu, Mengqi] Mississippi State Univ, Dept Ind & Syst Engn, Mississippi State, MS 39762 USA; [Weir, Jeffery D.] US Air Force, Inst Technol, Grad Sch Engn & Management, Dept Operat Sci, Wright Patterson AFB, OH 45433 USA; [Wu, Teresa] Arizona State Univ, Sch Comp, Tempe, AZ 85287 USA	10.1016/j.asoc.2014.08.069
	2014	Multi-model prediction and simulation of RESIDENTIAL BUILDING ENERGY in URBAN areas of Chongqing, South West China	ENERGY simulation and prediction plays a vital role in ENERGY POLICY and decision making. This study has been conducted to predict the future ENERGY DEMAND in the URBAN RESIDENTIAL BUILDINGS of Chongqing a CITY in south west China. The comparative study adopts and compares the results of different DEMAND models to improve estimation EFFICIENCY for future projections. A structured questionnaire su…	RESIDENTIAL BUILDINGS; ENERGY simulation; Multi-model prediction	NEURAL NETWORKS; CONSUMPTION; DEMAND	Yes		CO2 emission/energy consumption prediction			Energy and buildings	J	Article	26	Construction & Building Technology; Energy & Fuels; Engineering, Civil	Farzana, S; Liu, M; Baldwin, A; Hossain, MU	[Farzana, Shazia; Liu, Meng; Baldwin, Andrew] Chongqing Univ, Fac Urban Construct & Environm Engn, Chongqing 400045, Peoples R China; [Farzana, Shazia; Liu, Meng] Chongqing Univ, Key Lab Three Gorges Reservoir Reg Ecoenvironm, Minist Educ, Chongqing 400045, Peoples R China; [Farzana, Shazia; Liu, Meng] Chongqing Univ, Natl Ctr Int Res Low Carbon & Green Bldg, Chongqing 400045, Peoples R China; [H…	10.1016/j.enbuild.2014.06.007	Chongqing	China
	2014	A modular optimisation model for REDUCING ENERGY CONSUMPTION in large scale BUILDING facilities	With the pressing regulatory requirement to increase ENERGY EFFICIENCY in our BUILT ENVIRONMENT, significant researching efforts have been recently directed TOWARDS ENERGY optimisation with the overall objective of REDUCING ENERGY CONSUMPTION. ENERGY simulation and optimisation identify a class of applications that DEMAND high performance processing power in order to be realised within a feasible…	ENERGY optimisation; BUILDING simulation; Genetic algorithm; Artificial NEURAL NETWORK; High performance computing	simulation	Yes		building-level	operational efficiency		Renewable & sustainable energy reviews	J	Review	18	Green & Sustainable Science & Technology; Energy & Fuels	Petri, I; Li, HJ; Rezgui, Y; Yang, CF; Yuce, B; Jayan, B	[Petri, Ioan; Li, Haijiang; Rezgui, Yacine; Yuce, Baris; Jayan, Bejay] Cardiff Univ, Sch Engn, BRE Inst Sustainable Engn, Cardiff CF10 3AX, S Glam, Wales; [Yang Chunfeng] Dalian Univ Technol, State Key Lab Struct Anal Ind Equipment, Dept Engn Mech, Fac Vehicle Engn & Mech, Dalian, Peoples R China	10.1016/j.rser.2014.07.044
	2014	Cold and warm air temperature spells during the winter and summer seasons and their impact on ENERGY CONSUMPTION in URBAN areas	The main objective of this study is to determine and analyze cold and warm air temperature spells in the last 6 years (2007-2012) and reveal their impact on electrical ENERGY CONSUMPTION in a small-sized CITY such as Sombor (Serbia) with less than 50,000 inhabitants. Hourly air temperature values and electrical ENERGY CONSUMPTION data have been USED as database for all methods. Warm and cold temp…	Air temperature; ENERGY CONSUMPTION; Cold waves; Heat waves; Forecasting analysis; Serbia	heat-island; CLIMATE	Yes		building-level	retrofit envelope		Natural hazards	J	Article	9	Geosciences, Multidisciplinary; Meteorology & Atmospheric Sciences; Water Resources	Savic, S; Selakov, A; Milosevic, D	[Savic, Stevan; Milosevic, Dragan] Univ Novi Sad, Climatol & Hydrol Res Ctr, Fac Sci, Novi Sad 21000, Serbia; [Selakov, Aleksandar] Schneider Elect DMS NS, Novi Sad 21000, Serbia	10.1007/s11069-014-1074-y	Sombor	Serbia
	2014	BUILDING Behavior Simulation by Means of Artificial NEURAL NETWORK in Summer Conditions	Many studies in Italy showed that BUILDINGS are responsible for about 40% of total ENERGY CONSUMPTION, due to worsening performance of BUILDING envelope; in fact, a great number of Italian BUILDINGS were built before the 1970s and 80s. In particular, the ENERGY CONSUMPTIONs for cooling are considerably increased with respect to the ones for heating. In order to REDUCE the cooling ENERGY DEMAND, e…	Artificial NEURAL NETWORK (ANN); BUILDING envelope behaviour; unsteady simulations; cooling conditions	ENERGY-CONSUMPTION; performance; optimization; prediction; envelope; models; system; roof	Yes		retrofit envelope			Sustainability	J	Article	8	Green & Sustainable Science & Technology; Environmental Sciences; Environmental Studies	Buratti, C; Lascaro, E; Palladino, D; Vergoni, M	[Buratti, Cinzia; Lascaro, Elisa; Palladino, Domenico; Vergoni, Marco] Univ Perugia, Dept Engn, I-06125 Perugia, Italy	10.3390/su6085339	Umbria	Italy
	2014	Forecasting ENERGY CONSUMPTION of multi-family RESIDENTIAL BUILDINGS USING SUPPORT VECTOR REGRESSION: Investigating the impact of temporal and spatial monitoring granularity on performance accuracy	BUILDINGS are the dominant source of ENERGY CONSUMPTION and environmental emissions in URBAN areas. Therefore, the ability to forecast and characterize BUILDING ENERGY CONSUMPTION is vital to implementing URBAN ENERGY management and EFFICIENCY initiatives required to curb emissions. Advances in smart metering technology have enabled researchers to develop ''sensor based'' approaches to forecast B…	Forecasting; MACHINE LEARNING; Monitoring; Prediction; RESIDENTIAL BUILDING; SUPPORT VECTOR REGRESSION	occupant behavior; neural-networks; prediction; machine; load; system	Yes		building-level			Applied energy	J	Article	187	Energy & Fuels; Engineering, Chemical	Jain, RK; Smith, KM; Culligan, PJ; Taylor, JE	[Jain, Rishee K.] NYU, Ctr Urban Sci & Progress, Brooklyn, NY 11201 USA; [Smith, Kevin M.] Columbia Univ, Dept Earth & Environm Engn, New York, NY 10027 USA; [Culligan, Patricia J.] Columbia Univ, Dept Civil Engn & Engn Mech, Inst Data Sci & Engn, New York, NY 10027 USA; [Taylor, John E.] Virginia Tech, Dept Civil & Environm Engn, Blacksburg, VA 24061 USA	10.1016/j.apenergy.2014.02.057	New York City	USA
	2014	Multi-objectives, multi-period optimization of DISTRICT ENERGY systems: I. Selection of typical operating periods	The long term optimization of a DISTRICT ENERGY system is a computationally DEMANDING task due to the large number of data points representing the ENERGY DEMAND profiles. In order to REDUCE the number of data points and therefore the computational load of the optimization model, this paper presents a systematic procedure to REDUCE a complete data set of the ENERGY DEMAND profiles into a limited n…	Typical periods; DISTRICT ENERGY systems; Mixed integer linear programming; Evolutionary algorithm; Multi-objective optimization; ClUSTER analysis; k-means algorithm	sector BUILDINGS; DEMAND; clUSTERS; number	Yes		district heating and cooling			Computers & chemical engineering	J	Article	59	Computer Science, Interdisciplinary Applications; Engineering, Chemical	Fazlollahi, S; Bungener, SL; Mandel, P; Becker, G; Marechal, F	[Fazlollahi, Samira; Becker, Gwenaelle] Veolia Environm Rech & Innovat, F-78520 Limay, France; [Fazlollahi, Samira; Bungener, Stephane Laurent; Marechal, Francois] Ecole Polytech Fed Lausanne, CH-1015 Lausanne, Switzerland; [Mandel, Pierre] Veolia Environm Rech & Innovat, F-78603 Maisons Laffitte, France	10.1016/j.compchemeng.2014.03.005
	2014	Development of surrogate models USING artificial NEURAL NETWORK for BUILDING shell ENERGY labelling	Surrogate models are an important part of BUILDING ENERGY labelling programs, but these models still present low accuracy, particularly in cooling-dominated CLIMATES. The objective of this study was to evaluate the feasibility of USING an artificial NEURAL NETWORK (ANN) to improve the accuracy of surrogate models for labelling purposes. An ANN was applied to model the BUILDING stock of a CITY in …	Artificial NEURAL NETWORK; BUILDING ENERGY simulation; Surrogate model	RESIDENTIAL BUILDINGS; cooling load; night ventilation; heat-pumps; design; performance; prediction; systems; EFFICIENCY; CONSUMPTION	Yes		retrofit envelope	building-level		Energy policy	J	Article	31	Economics; Energy & Fuels; Environmental Sciences; Environmental Studies	Melo, AP; Costola, D; Lamberts, R; Hensen, JLM	[Melo, A. P.; Lamberts, R.] Univ Fed Santa Catarina, Energy Efficiency Bldg Lab, BR-88040900 Florianopolis, SC, Brazil; [Costola, D.; Hensen, J. L. M.] Eindhoven Univ Technol, NL-5600 MB Eindhoven, Netherlands	10.1016/j.enpol.2014.02.001	Florianópolis	Brazil
	2014	PREDICTION OF SPACE HEATING CONSUMPTION IN DISTRICT HEATED APARTMENTS	Enhancing ENERGY EFFICIENCY from the producer to the end-USERS is a prioritized objective of European ENERGY POLICIES. The most difficult element to understand and to control is the last link, the consumer. Most simulation tools for the estimation of heat DEMAND in BUILDINGS are based on the input parameters according to environmental conditions and the features of the materials and equipments. S…		BUILDING ENERGY-CONSUMPTION; artificial neural-network; model; performance; simulation	Yes		district heating and cooling	building-level		Proceedings of the asme international mechanical engineering congress and exposition, 2013, vol 6b	B	Proceedings Paper	0	Energy & Fuels; Engineering, Mechanical; Nuclear Science & Technology	Popescu, D; Ungureanu, F	[Popescu, D.] Tech Univ Gheorghe Asachi Iasi, Fluid Mech Dept, Iasi 700050, Romania; [Ungureanu, F.] Tech Univ Gheorghe Asachi Iasi, Dept Comp Sci, Iasi 700050, Romania
	2014	Determinants of domestic electriCITY CONSUMPTION and ENERGY behavior: a Greek case study	HOUSEHOLDS constitute an important target group for ENERGY conservation. Understanding the occupant's behavior and defining the factors that considerable affect the electriCITY CONSUMPTION will contribute to improving the ENERGY performance of BUILDINGS. An online survey was therefore conducted and 221 questionnaires were completed to provide the necessary data. The present study links the demogr…	ENERGY EFFICIENCY; demographics; electriCITY CONSUMPTION; DWELLINGS; statistical analysis; K-means clUSTERING	economic-growth; EFFICIENCY gap; BUILDINGS; DEMAND	Yes		consumer behavior			5th international conference on information, intelligence, systems and applications, iisa 2014	B	Proceedings Paper	1	Computer Science, Artificial Intelligence; Computer Science, Information Systems	Desipri, K; Legaki, NZ; Assimakopoulos, V	[Desipri, Konstantina; Legaki, Nikoletta Zampeta; Assimakopoulos, Vassilis] NTUA Sch Elect & Comp Engn, Decis Support Syst Lab, Forecasting & Strategy Unit, Athens, Greece
	2014	FUEL Poverty and Indoor Temperature ClUSTERS of Low Income HOUSEHOLDS in Athens, Greece	FUEL poverty is a complex socioeconomic problem that affects low income HOUSEHOLDS hit by the global economic recession. This research employed k-means clUSTERING to group 50 low and very low income HOUSEHOLDS into three clUSTERS (Poorest, Average and Richest) based on mean indoor temperature, surface area of the DWELLING, number of rooms, family size, BUILDING age and income. The Poorest ClUSTER…	ENERGY poverty; FUEL poverty; ENERGY CONSUMPTION; low income HOUSEHOLDS	RESIDENTIAL sector; ENERGY	Yes		consumer behavior			5th international conference on information, intelligence, systems and applications, iisa 2014	B	Proceedings Paper	1	Computer Science, Artificial Intelligence; Computer Science, Information Systems	Paravantis, JA; Santamouris, M	[Paravantis, John A.] Univ Piraeus, Dept Int & European Studies, Piraeus, Greece; [Santamouris, Mathew] Univ Athens, Dept Phys, Athens, Greece
	2014	ClUSTERING URBAN Areas for Optimizing the Design and the Operation of DISTRICT ENERGY Systems	Solving the MILP model for optimizing the design and operating strategy of DISTRICT ENERGY systems (DES) is a computationally DEMANDING task due to the large number of subsystems (i.e. resources, conversion technologies, BUILDINGS and networks) and corresponding decision variables. In order to REDUCE the number of decision variables and therefore the computational load of the problem, this paper …	DISTRICT ENERGY systems (DES); Geographical information systems (GIS); CO2 MITIGATION; Mixed Integer Linear Programming (MILP); k-means clUSTERING	REDUCTION techniques	Yes		district heating and cooling			24th european symposium on computer aided process engineering, pts a and b	S	Proceedings Paper	12	Computer Science, Interdisciplinary Applications; Engineering, Chemical	Fazlollahi, S; Girardin, L; Marechal, F	[Fazlollahi, Samira] VERI, 291 Ave Dreyfous Ducas, F-78520 Limay, France; [Girardin, Luc; Marechal, Francois] Ecole Polytechn Fed Lausanne, Ind Proc & Energy Syst Engn Lab, CH-1015 Lausanne, Switzerland
	2014	Prediction of BUILDING ENERGY CONSUMPTION Based on PSO - RBF NEURAL NETWORK	At present, BUILDING ENERGY conservation is a hot topic in URBAN construction and ENERGY conservation research. Predicting the trend of ENERGY CONSUMPTION is very meaningful for a whole BUILDING ENERGY management. Compared with the other feed-forward NEURAL NETWORKS, RBF network learning faster and the ability of function approximation is stronger, but its performance still need to be improved. W…	ENERGY CONSUMPTION prediction; RBF NEURAL NETWORK; Particle swarm optimization algorithm		Yes		building-level			2014 ieee international conference on system science and engineering (icsse)	S	Proceedings Paper	7	Computer Science, Information Systems; Computer Science, Theory & Methods	Zhang, Y; Chen, QJ	[Zhang, Ying; Chen, Qijun] Tongji Univ, Sch Elect & Informat, Shanghai 200092, Peoples R China
	2013	Multi-objective optimization of a BUILDING envelope for thermal performance USING genetic algorithms and artificial NEURAL NETWORK	The objective of this paper is to present a method to optimize the equivalent thermophysical properties of the external walls (thermal conductivity k(wall) and volumetric specific heat (rho c)(wall)) of a DWELLING in order to improve its thermal EFFICIENCY. Classical optimization involves several dynamic yearly thermal simulations, which are commonly quite time consuming. To REDUCE the computatio…	Multi-objective optimization; BUILDING envelope; ENERGY performance; Comfort degree; ANN; Genetic algorithm	ENERGY; prediction; comfort; genopt; model	Yes		retrofit envelope			Energy and buildings	J	Article	51	Construction & Building Technology; Energy & Fuels; Engineering, Civil	Gossard, D; Lartigue, B; Thellier, F	[Gossard, D.; Lartigue, B.; Thellier, F.] Univ Toulouse 3, Lab PHASE, F-31062 Toulouse 9, France	10.1016/j.enbuild.2013.08.026	Nancy, Nice	France
	2013	Economic analysis of exergy EFFICIENCY based control strategy for geothermal DISTRICT HEATING system	In this study, the exergy EFFICIENCY based control strategy (ExEBCS) for exergy EFFICIENCY maximization in geothermal DISTRICT HEATING systems (GDHSs) is economically evaluated. As a real case study, the Afyon GDHS in the CITY of Afyonkarahisar/Turkey is considered. Its actual thermal data as of average weekly data are collected in heating seasons during the period 2006-2010 for artificial NEURAL…	DISTRICT HEATING; Geothermal; Exergy; Thermal control strategy; Economic impact	solar BUILDINGS; ENERGY; parameters	Yes		district heating and cooling			Energy conversion and management	J	Article	9	Thermodynamics; Energy & Fuels; Mechanics	Kecebas, A; Yabanova, I	[Kecebas, Ali] Mugla Sitki Kocman Univ, Fac Technol, Dept Energy Syst Engn, Mugla, Turkey; [Yabanova, Ismail] Afyon Kocatepe Univ, Fac Technol, Dept Elect & Elect, Afyon, Turkey	10.1016/j.enconman.2013.03.036	Afyonkarahisar	Turkey
	2013	Modeling of the ENERGY DEMAND of the RESIDENTIAL sector in the United States USING regression models and artificial NEURAL NETWORKS	This paper describes the development of ENERGY-DEMAND models which are able to predict the future ENERGY DEMAND in the RESIDENTIAL sector of the United States. One set of models USE an artificial NEURAL NETWORK (ANN) technique, and the other set of models USE a multiple linear regression (MLR) technique. The models are USED to forecast future HOUSEHOLD ENERGY DEMAND considering different scenario…	ENERGY DEMAND modeling; Regression analysis; Artificial NEURAL NETWORKS; RESIDENTIAL sector	CONSUMPTION	Yes		demand response	CO2 emission/energy consumption prediction		Applied energy	J	Article	67	Energy & Fuels; Engineering, Chemical	Kialashaki, A; Reisel, JR	[Kialashaki, Arash; Reisel, John R.] Univ Wisconsin Milwaukee, Dept Mech Engn, Milwaukee, WI USA	10.1016/j.apenergy.2013.03.034		USA
	2013	Energetic and economic evaluations of geothermal DISTRICT HEATING systems by USING ANN	This paper proposes an artificial NEURAL NETWORK (ANN) technique as a new approach to evaluate the ENERGY input, losses, output, EFFICIENCY, and economic optimization of a geothermal DISTRICT HEATING system (GDHS). By USING ANN, an energetic analysis is evaluated on the Afyon geothermal DISTRICT HEATING system (AGDHS) located in the CITY of Afyonkarahisar, Turkey. Promising results are obtained a…	Geothermal ENERGY; DISTRICT HEATING; Life cycle cost	artificial neural-networks; exergy analysis; power production; turkey; performance; assessments; insulation; prediction; BUILDINGS; impacts	Yes		district heating and cooling			Energy policy	J	Article	16	Economics; Energy & Fuels; Environmental Sciences; Environmental Studies	Kecebas, A; Alkan, MA; Yabanova, I; Yumurtaci, M	[Kecebas, Ali] Mugla Sitki Kocman Univ, Fac Technol, Dept Energy Syst Engn, Mugla, Turkey; [Alkan, Mehmet Ali] Mugla Sitki Kocman Univ, Dept Installat Technol, Ula Ali Kocman Vocat High Sch, Mugla, Turkey; [Yabanova, Ismail] Afyon Kocatepe Univ, Fac Technol, Dept Elect & Elect, Afyon, Turkey; [Yumurtaci, Mehmet] Afyon Kocatepe Univ, Tech Educ Fac, Dept Elect, Afyon, Turkey	10.1016/j.enpol.2013.01.039	Afyonkarahisar	Turkey
	2013	A component based bottom-up BUILDING stock model for comprehensive environmental impact assessment and target control	The BUILDING stock is one of the most important ENERGY consumers worldwide. Therefore, a number of ENERGY REDUCTION targets and regulations exist for the construction sector. Different BUILDING stock models have been developed in order to investigate the potentials of ENERGY-EFFICIENCY and changes in ENERGY source in the BUILDING stock. However, these models often have important shortcomings, sin…	BUILDING stock; Bottom-up model; ENERGY EFFICIENCY; GREENHOUSE GAS emissions; Life cycle assessment; SUSTAINABILITY targets	HOUSEHOLD ENERGY-CONSUMPTION; life-cycle assessment; technology diffUSION; neural-network; lca	Yes	Confirmed	retrofit envelope	CO2 emission/energy consumption prediction		Renewable & sustainable energy reviews	J	Review	47	Green & Sustainable Science & Technology; Energy & Fuels	Heeren, N; Jakob, M; Martius, G; Gross, N; Wallbaum, H	[Heeren, Niko] ETH, Inst Environm Engn, Chair Ecol Syst Design, CH-8093 Zurich, Switzerland; [Jakob, Martin; Martius, Gregor; Gross, Nadja] TEP Energy GmbH, CH-8037 Zurich, Switzerland; [Wallbaum, Holger] Chalmers Univ Technol, Chair Sustainable Bldg Civil & Environm Engn, SE-41296 Gothenburg, Sweden	10.1016/j.rser.2012.11.064	Zurich	Switzerland
	2013	Development of ANN model for geothermal DISTRICT HEATING system and a novel PID-based control strategy	This article refers to development of ANN modeling for geothermal DISTRICT HEATING systems, and the novel and optimal control strategy for exergy EFFICIENCY maximization by USING these systems. As a real case study, the geothermal DISTRICT HEATING system in Afyonkarahisar (AGDHS), Turkey is considered. Its actual thermal data as of average weekly data are collected in heating seasons during the p…	DISTRICT HEATING; Geothermal; Exergy; Artificial NEURAL NETWORK; Thermal control; Proportional integral derivative controller	predictive control; exergy analysis; performance; plant; BUILDINGS; ENERGY	Yes		district heating and cooling			Applied thermal engineering	J	Article	28	Thermodynamics; Energy & Fuels; Engineering, Mechanical; Mechanics	Yabanova, I; Kecebas, A	[Yabanova, Ismail] Afyon Kocatepe Univ, Fac Technol, Dept Elect & Elect, Afyon, Turkey; [Kecebas, Ali] Afyon Kocatepe Univ, Fac Technol, Dept Mech Engn, Afyon, Turkey	10.1016/j.applthermaleng.2012.10.044	Afyonkarahisar	Turkey
	2013	Evaluation of time series techniques to characterise domestic electriCITY DEMAND	This paper discUSSES time series approaches, often USED by Transmission System Operators (TSOs) to forecast system DEMAND, and applies them at an individual DWELLING level. In particular, two techniques, Fourier transforms and GAUSSIAN PROCESSES were evaluated and USED to characterise individual HOUSEHOLD electriCITY DEMAND. The performance of the characterisation approaches were evaluated based …	Domestic electriCITY CONSUMPTION; ElectriCITY DEMAND load profiles; Time series modelling	conditional DEMAND; ENERGY-CONSUMPTION; load profiles; appliance; space; model	Yes		building-level	consumer behavior		Energy	J	Article	53	Thermodynamics; Energy & Fuels	McLoughlin, F; Duffy, A; Conlon, M	[McLoughlin, Fintan; Duffy, Aidan] Dublin Inst Technol, Sch Civil & Bldg Serv, Dublin 1, Ireland; [McLoughlin, Fintan; Duffy, Aidan] Dublin Inst Technol, Dublin Energy Lab, Dublin 1, Ireland; [Conlon, Michael] Dublin Inst Technol, Sch Elect Engn Syst, Dublin 4, Ireland; [Conlon, Michael] Dublin Inst Technol, Dublin Energy Lab, Dublin 4, Ireland	10.1016/j.energy.2012.11.048		Ireland
	2013	Optimal chiller loading in a DISTRICT COOLING system with thermal ENERGY storage	A novel technique for solving a dynamic optimal chiller loading problem is presented. This method REDUCES the complexity of the dynamic problem by considering all chillers to be a single, optimal chiller, which significantly REDUCES the number of decision variables. A static optimal chiller loading problem is solved as a sub-problem to give the optimal total power required at each time interval. …	Optimal chiller loading; Dynamic optimization; Thermal ENERGY storage; DISTRICT ENERGY; ENERGY conservation; Dynamics	empirically-based models; neural-networks; water chillers; SAVING ENERGY; performance; BUILDINGS; plant	Yes		district heating and cooling			Energy	J	Article	57	Thermodynamics; Energy & Fuels	Powell, KM; Cole, WJ; Ekarika, UF; Edgar, TF	[Powell, Kody M.; Cole, Wesley J.; Ekarika, Udememfon F.; Edgar, Thomas F.] Univ Texas Austin, Dept Chem Engn, Austin, TX 78712 USA	10.1016/j.energy.2012.10.058
	2012	The impact of place-based affiliation networks on ENERGY conservation: An holistic model that integrates the influence of BUILDINGS, residents and the NEIGHBORHOOD context	Models that consider, separately, the ENERGY USE of networks of BUILDINGS and networks of BUILDING occupants have been explored in existing literature TOWARD the goal of understanding the role of BUILDING networks or occupant networks on BUILDING ENERGY conservation. Yet, the NEIGHBORHOOD surrounding BUILDINGS and their occupants can also have an influence on ENERGY CONSUMPTION patterns. Thus, th…	Affiliation network; Artificial NEURAL NETWORK; Behavior; ENERGY EFFICIENCY; Inter-BUILDING effect; NEIGHBORHOOD; Network; Peer network effect; Social network	electriCITY CONSUMPTION; environmental concern; social ties; attachment; behavior; participation; predictions; simulation; programs; design	Yes		building-level	consumer behavior		Energy and buildings	J	Article	41	Construction & Building Technology; Energy & Fuels; Engineering, Civil	Xu, XQ; Taylor, JE; Pisello, AL; Culligan, PJ	[Xu, Xiaoqi; Culligan, Patricia J.] Columbia Univ, Dept Civil Engn & Engn Mech, New York, NY 10027 USA; [Taylor, John E.] Virginia Tech, Charles E Via Jr Dept Civil & Environm Engn, Blacksburg, VA 24061 USA; [Pisello, Anna Laura] Univ Perugia, Dept Ind Engn, I-06125 Perugia, Italy	10.1016/j.enbuild.2012.09.013
	2012	A Randomized Response Model for Privacy Preserving Smart Metering	The adoption of smart meters may bring new privacy concerns to the general public. Given the fact that metering data of individual HOMES/factories is accumulated every 15 min, it is possible to infer the pattern of electriCITY CONSUMPTION of individual USERS. In order to protect the privacy of USERS in a completely de-centralized setting (i.e., individuals do not communicate with one another), we…	Data privacy; GAUSSIAN MIXTURE; smart metering	security	Yes	Confirmed	consumer behavior	district heating and cooling		Ieee transactions on smart grid	J	Article	40	Engineering, Electrical & Electronic	Wang, S; Cui, LJ; Que, JL; Choi, DH; Jiang, XQ; Cheng, S; Xie, L	[Wang, Shuang; Que, Jialan; Jiang, Xiaoqian] Univ Calif San Diego, Div Biomed Informat, San Diego, CA 92093 USA; [Cui, Lijuan; Cheng, Samuel] Univ Oklahoma, Sch Elect & Comp Engn, Tulsa, OK 74135 USA; [Choi, Dae-Hyun; Xie, Le] Texas A&M Univ, Dept Elect & Comp Engn, College Stn, TX 77843 USA	10.1109/TSG.2012.2192487
	2012	Predictive control and thermal ENERGY storage for optimizing a multi-ENERGY DISTRICT boiler	As part of the OptiEnR research project, the present paper deals with optimizing the multi-ENERGY DISTRICT boiler of La Rochelle (France) adding to the plant a controlled thermal storage tank. This plant supplies domestic hot water and heats RESIDENTIAL and public BUILDINGS, USING renewable and fossil resources. Due to the complexity of the DISTRICT boiler as a whole and the strong interACTIONS b…	Multi-ENERGY DISTRICT boiler; ENERGY resources management; Fossil FUELs; CO2 emissions; Model predictive control; Thermal ENERGY storage	pattern search algorithms; constrained minimization; optimization; CONSUMPTION; technology; systems	Yes		district heating and cooling			Journal of process control	J	Article	12	Automation & Control Systems; Engineering, Chemical	Eynard, J; Grieu, S; Polit, M	[Eynard, Julien; Grieu, Stephane; Polit, Monique] Tecnosud, PROMES CNRS, Rambla Thermodynam, F-66100 Perpignan, France; [Eynard, Julien; Grieu, Stephane; Polit, Monique] Univ Perpignan, F-66860 Perpignan, France	10.1016/j.jprocont.2012.05.011	La Rochelle	France
	2011	A new method to develop typical weather years in different CLIMATES for BUILDING ENERGY USE studies	PRINCIPAL COMPONENT ANALYSIS of 30-year long-term meteorological variables was conducted. Typical principal component years (TPCYs) were determined for Harbin, Beijing, Shanghai, Kunming and Hong Kong representing the five major architectural CLIMATES across China: severe cold, cold, hot summer and cold winter, mild, and hot summer and warm winter. In each CLIMATE zone, the TPCY was compared with…	PRINCIPAL COMPONENT ANALYSIS; Typical weather years; BUILDING ENERGY USE; CLIMATE change; General circulation models; China	BUILT ENVIRONMENT	Yes		Data provision/imputation			Energy	J	Article	35	Thermodynamics; Energy & Fuels	Yang, L; Wan, KKW; Li, DHW; Lam, JC	[Wan, Kevin K. W.; Li, Danny H. W.; Lam, Joseph C.] City Univ Hong Kong, Dept Civil & Architectural Engn, Bldg Energy Res Grp, Kowloon, Hong Kong, Peoples R China; [Yang, Liu] Xian Univ Architecture & Technol, Sch Architecture, Xian 710055, Shaanxi, Peoples R China	10.1016/j.energy.2011.07.053	Harbin, Beijing, Shanghai, Kunming	Hong Kong, China
	2011	PRINCIPAL COMPONENT ANALYSIS of the electriCITY CONSUMPTION in RESIDENTIAL DWELLINGS	Data gathered from ENERGY audits, phone surveys and smart meter readings are USED to derive regression models of the electriCITY CONSUMPTION of HOUSING units in Oshawa (Ontario, Canada). The database USED comprises 59 predictors, for 62 observations. To address the problem of multi-collinearities among the predictors and at the same time REDUCE the number of needed predictors, a methodology is de…	PRINCIPAL COMPONENT ANALYSIS; Latent root regression; Subset selection; ElectriCITY CONSUMPTION; RESIDENTIAL; Socio-economic factors	regression	Yes		building-level	consumer behavior		Energy and buildings	J	Article	51	Construction & Building Technology; Energy & Fuels; Engineering, Civil	Ndiaye, D; Gabriel, K	[Ndiaye, Demba] Setty & Associates, Fairfax, VA 22031 USA; [Gabriel, Kamiel] Univ Ontario, Inst Technol, Fac Engn & Appl Sci, Oshawa, ON, Canada	10.1016/j.enbuild.2010.10.008	Oshawa, Ontario	Canada
	2011	Future trends of BUILDING heating and cooling loads and ENERGY CONSUMPTION in different CLIMATES	PRINCIPAL COMPONENT ANALYSIS of dry-bulb temperature, wet-bulb temperature and global solar radiation was considered, and a new CLIMATIC index (principal component Z) determined for two emissions scenarios low and medium forcing. Multi-year BUILDING ENERGY simulations were conducted for generic air-conditioned office BUILDINGS in Harbin, Beijing, Shanghai, Kunming and Hong Kong, representing the …	PRINCIPAL COMPONENT ANALYSIS; Office BUILDINGS; ENERGY USE; General circulation models; CLIMATE change; China	commercial BUILDINGS; BUILT ENVIRONMENT; weather data; impact	Yes		building-level			Building and environment	J	Article	141	Construction & Building Technology; Engineering, Environmental; Engineering, Civil	Wan, KKW; Li, DHW; Liu, DL; Lam, JC	[Wan, Kevin K. W.; Li, Danny H. W.; Lam, Joseph C.] City Univ Hong Kong, Dept Bldg & Construct, Bldg Energy Res Grp, Kowloon, Hong Kong, Peoples R China; [Liu, Dalong] Xian Univ Architecture & Technol, Sch Architecture, Xian 710055, Shaanxi, Peoples R China	10.1016/j.buildenv.2010.07.016	Harbin, Beijing, Shanghai, Kunming	Hong Kong, China
	2010	ALGORITHMS USING NEURAL NETWORKS FOR HEAT DISTRIBUTION CENTERS CONTROL	Regulation and control of thermal processes in BUILDINGS has a large influence on the heat CONSUMPTION for heating purposes. Applied solution so far USES standard algorithms like proportional derivative or proportional integrating derivative. The disadvantage of these solutions is the need for constant supervision of qualified technical services. Character of thermal processes is the variation of…	DISTRICT HEATING; heating; automatic control engineering; NEURAL NETWORKS; computer science		Yes		district heating and cooling			Rynek energii	J	Article	1	Energy & Fuels; Engineering, Electrical & Electronic	Chmielnicki, WJ
	2010	DETECTION OF HEAT FLUX FAILURES IN BUILDING USING A SOFT COMPUTING DIAGNOSTIC SYSTEM	The detection of insulation failures in BUILDINGS could potentially conserve ENERGY supplies and improve future designs. Improvements to thermal insulation in BUILDINGS include the development of models to assess fabric gain -heat flux through exterior walls in the BUILDING- and heating processes. Thermal insulation standards are now contractual obligations in new BUILDINGS, and the ENERGY EFFICI…	Computational intelligence; soft computing; identification systems; artificial NEURAL NETWORKS; non-linear systems; energetic EFFICIENCY	thermal insulation; fault-diagnosis; identification; maximum; values; model	Yes		retrofit envelope			Neural network world	J	Article	5	Computer Science, Artificial Intelligence	Sedano, J; Corchado, E; Curiel, L; Villar, JR; de la Cal, E	[Sedano, Javier] Technol Inst Castilla & Leon, Dept Artificial Intelligence & Appl Elect, Burgos 09001, Spain; [Corchado, Emilio] Univ Salamanca, Dept Informat & Automat, E-37008 Salamanca, Spain; [Curiel, Leticia] Univ Burgos, EPS Politecn, Dept Civil Engn, Burgos 09001, Spain; [Ramon Villar, Jose; de la Cal, Enrique] Univ Oviedo, Dept Comp Sci, Gijon 33204, Spain
	2009	Optimization of DISTRICT HEATING systems based on the DEMAND forecast in the capital region	A DISTRICT HEATING system (DHS) consists of ENERGY suppliers and consumers, heat generation and storage facilities and power transmission lines in the region. DHS has taken charge of an increasingly important role as the ENERGY cost increases recently. In this work, a model for operational optimization of the DHS in the metroPOLITAN area is presented by incorporating forecast for DEMAND from cUST…	DISTRICT HEATING System; Optimal Operation; DEMAND Forecast; DISTRICT Network; Mixed Integer Linear Programming	short-term	Yes		district heating and cooling	building-level		Korean journal of chemical engineering	J	Article	2	Chemistry, Multidisciplinary; Engineering, Chemical	Park, TC; Kim, US; Kim, LH; Kim, WH; Yeo, YK	[Park, Tae Chang; Kim, Ui Sik; Yeo, Yeong Koo] Hanyang Univ, Dept Chem Engn, Seoul 133791, South Korea; [Kim, Lae-Hyun] Seoul Natl Univ Technol, Dept Chem Engn, Seoul 135743, South Korea; [Kim, Weon Ho] Infortrol Inc, Seoul 158735, South Korea	10.1007/s11814-009-0282-8	Seoul	Korea
	2009	Simulation models for the analysis of space heat CONSUMPTION of BUILDINGS	This study develops and analyzes an original methodology for the simulation and prediction of space heating ENERGY CONSUMPTION in BUILDINGS connected to a DISTRICT HEATING system, characterized by lack of individual control systems for end-USERS. The identification of the input parameters is based on both classical engineering equations and statistical analysis of collected data. Two main factors…	DISTRICT HEATING systems; Simulation model; Artificial NEURAL NETWORKS models; Prediction; ENERGY SAVINGS	electriCITY DEMAND; systems; loads	Yes		district heating and cooling	consumer behavior		Energy	J	Article	25	Thermodynamics; Energy & Fuels	Popescu, D; Ungureanu, F; Hernandez-Guerrero, A	[Popescu, Daniela] Tech Univ, Fluid Mech Dept, Iasi, Romania; [Ungureanu, Florina] Tech Univ, Dept Comp Sci, Iasi, Romania; [Hernandez-Guerrero, Abel] Univ Guanajuato, Dept Mech Engn, Guanajuato 36730, Mexico	10.1016/j.energy.2009.05.035	Iasi	Romania
	2009	Impact of modelled global solar radiation on simulated BUILDING heating and cooling loads	Two-parameter regression models were USED to predict global solar radiation (GSR) for the nine major thermal zones and sub-zones - severe cold (1, 11 and 111), cold (1, 11 and 111), hot summer and cold winter, mild, and hot summer and warm winter - across China. The impact of USING modelled GSR on BUILDING ENERGY simulation was investigated. A total of nine CITIES were selected, one for each ther…	Solar radiation models; Heating and cooling loads; Office BUILDINGS; ENERGY simulation; Thermal CLIMATE zones; China	different CLIMATES; neural-networks; china; validation	Yes		Multi-city study	building-level		Energy conversion and management	J	Article	12	Thermodynamics; Energy & Fuels; Mechanics	Wan, KKW; Cheung, KL; Liu, DL; Lam, JC	[Wan, Kevin K. W.; Cheung, K. L.; Lam, Joseph C.] City Univ Hong Kong, Bldg Energy Res Grp, Dept Bldg & Construct, Kowloon, Hong Kong, Peoples R China; [Liu, Dalong] Xian Univ Architecture & Technol, Sch Architecture, Xian 710055, Shaanxi, Peoples R China	10.1016/j.enconman.2008.10.004		China
	2008	Impact of solar model selection on BUILDING ENERGY analysis for Kuwait	This paper summarizes the results of a comparative analysis for four models utilized to predict solar radiation in Kuwait CITY Kuwait. The four models include the Kasten model, Zhang and Huang model, Muneer model, and NEURAL NETWORK based model. The analysis was based on hourly measured solar data for Kuwait CITY. The measured hourly solar radiation data are obtained for the year 1994 and include…	BUILDING ENERGY simulation; solar models; weather files		Yes		building-level			Journal of solar energy engineering-transactions of the asme	J	Article; Proceedings Paper	2	Energy & Fuels; Engineering, Mechanical	Al-Anzi, A; Seo, D; Krarti, M	[Al-Anzi, Adnan] Kuwait Univ, Dept Architecture, Safat 13060, Kuwait; [Seo, Donghyun; Krarti, Moncef] Univ Colorado, Dept Civil Environm & Architectural Engn, Boulder, CO 80309 USA	10.1115/1.2844410	Kuwait City	Kuwait
	2008	Development and validation of regression models to predict monthly heating DEMAND for RESIDENTIAL BUILDINGS	The present research work concerns development of regression models to predict the monthly heating DEMAND for single-family RESIDENTIAL sector in temperate CLIMATES, with the aim to be USED by architects or design engineers as support tools in the very first stage of their projects in finding efficiently energetic solutions. Another interest to USE such simplified models is to make it possible a …	BUILDING shape factor; window to floor area ratio; BUILDING time constant; heating DEMAND; sol-air temperature; multiple regression analysis	neural-networks; ENERGY USE; functional structure; shape; CONSUMPTION; optimization; design; space; well	Yes		building-level	Multi-city study		Energy and buildings	J	Article	152	Construction & Building Technology; Energy & Fuels; Engineering, Civil	Catalina, T; Virgone, J; Blanco, E	[Virgone, Joseph] Univ Lyon 1, DGCB Lab, CNRS, IUT A Genie Civil,URA 1652, F-69622 Villeurbanne, France; [Catalina, Tiberiu] Univ Lyon 1, Inst Natl Sci Appl Lyon, CNRS, CETHIL,UMR5008, F-69621 Villeurbanne, France; [Blanco, Eric] Ecole Cent Lyon, UMR 5005, AMPERE Lab, F-69134 Ecully, France	10.1016/j.enbuild.2008.04.001	Nice	France
	2006	Correcting aggregate ENERGY CONSUMPTION data to account for variability in local weather	There is a growing need in the atmospheric modeling community for CITY-scale ENERGY CONSUMPTION data to estimate the magnitude of waste heat emissions in URBAN areas. While ENERGY CONSUMPTION data are widely available at aggregate space and time scales they are often difficult to obtain at the finer scales needed in such applications. Simply assuming that local CONSUMPTION patterns mirror those a…	load modeling; degree days; anthropogenic heating; ENERGY models; atmospheric modeling; URBAN CLIMATE	artificial neural-network; URBAN CLIMATE; sensitivity; methodology; simulation; impacts; heat	Yes		CO2 emission/energy consumption prediction			Environmental modelling & software	J	Article	19	Computer Science, Interdisciplinary Applications; Engineering, Environmental; Environmental Sciences	Sailor, DJ; Vasireddy, C	Portland State Univ, Dept Mech & Mat Engn, Portland, OR 97207 USA	10.1016/j.envsoft.2005.08.001	Los Angeles, Seattle	USA
	2003	Modelling of RESIDENTIAL ENERGY CONSUMPTION at the national level	Three methods are currently USED to model RESIDENTIAL ENERGY CONSUMPTION at the national level: the engineering method (EM), the conditional DEMAND analysis (CDA) method, and the NEURAL NETWORK (NN) method. While the USE of the first two methods has been established over the past decade for RESIDENTIAL ENERGY modelling, the USE of NN method is still in the development and verification phase. The …	ENERGY; modelling; RESIDENTIAL ENERGY CONSUMPTION	artificial NEURAL NETWORKS; conditional-DEMAND; FUEL substitution; canada; EFFICIENCY; impact	Yes		building-level			International journal of energy research	J	Article; Proceedings Paper	29	Energy & Fuels; Nuclear Science & Technology	Aydinalp, M; Ugursal, VI; Fung, AS	Dalhousie Univ, Dept Mech Engn, CREEDAC, Halifax, NS B3J 2X4, Canada	10.1002/er.887
	1999	Artificial NEURAL NETWORK application to ENERGY system planning	An ENERGY system planning exercise involves solving a detailed optimization problem, in which the total cost (annuitized fixed and variable) incurred on new/existing ENERGY resources and devices is minimized taking into account the various constraints like the resource limitation, capaCITY of devices. This optimization exercise is often carried out USING Mixed Integer Linear Programming (MIP) Met…	artificial NEURAL NETWORK; ENERGY system planning		Yes		Utility infrastructure planning			Engineering intelligent systems for electrical engineering and communications	J	Article	1	Computer Science, Artificial Intelligence; Engineering, Electrical & Electronic	Tripathy, SC; Satsangi, PS; Balasubramanian, R; Malik, SB	Indian Inst Technol, Ctr Energy Studies, New Delhi 110016, India
	2021	Data-Driven Approach for Evaluating the Energy Efficiency in Multifamily Residential Buildings	Cities account for more than 70% of global fossil fuel use and greenhouse gas emissions. This number is likely to increase due to urban population growth. Much of the energy used in cities is consumed in buildings (e.g., for space conditioning and lighting). Better understanding of energy use patterns therefore is paramount. This paper leveraged advances in machine learning to model energy consum…	Energy modeling; Sustainability; Residential building; Machine learning; XGBoost; Shapley Additive Explanations (SHAP)	EMBODIED ENERGY; PREDICTION; CONSUMPTION	Yes	Confirmed	operational efficiency	building-level	retrofit envelope	PRACTICE PERIODICAL ON STRUCTURAL DESIGN AND CONSTRUCTION	J	Article	11	Engineering, Civil	Seyrfar, A; Ataei, H; Movahedi, A; Derrible, S	[Seyrfar, Abolfazl; Movahedi, Ali; Derrible, Sybil] Univ Illinois, Dept Civil Mat & Environm Engn, 842 West Taylor St,ERF 2095, Chicago, IL 60607 USA; [Ataei, Hossein] Univ Illinois, Dept Civil Mat & Environm Engn, Construct Engn & Management Program, 842 West Taylor St,ERF 2095, Chicago, IL 60607 USA	10.1061/(ASCE)SC.1943-5576.0000555	Chicago	USA
	2021	A Hybrid Simulation Model to Predict the Cooling Energy Consumption for Residential Housing in Hong Kong	In Hong Kong, buildings consume 90% of the electricity generated and over 60% of the city's carbon emissions are attributable to generating power for buildings. In 2018, Hong Kong residential sector consumed 41,965 TJ (26%) of total electricity generated, with private housing accounting for 52% and public housing taking in 26%, making them the two major contributors of greenhouse gas emissions. F…	climate change; hybrid EP-ANN model; residential buildings; annual cooling energy prediction	ARTIFICIAL NEURAL-NETWORKS; BAYESIAN REGULARIZATION; BUILDINGS; DESIGN; PERFORMANCE; DEMAND; SECTOR; OPTIMIZATION; INTELLIGENCE; ENVELOPE	Yes	Confirmed	building-level	consumer behavior		ENERGIES	J	Article	0	Energy & Fuels	Mui, KW; Wong, LT; Satheesan, MK; Balachandran, A	[Mui, Kwok Wai; Wong, Ling Tim; Satheesan, Manoj Kumar; Balachandran, Anjana] Hong Kong Polytech Univ, Dept Bldg Serv Engn, Hong Kong, Peoples R China	10.3390/en14164850	Hong Kong	Hong Kong
	2020	Comparative study of machine learning-based multi-objective prediction framework for multiple building energy loads	Buildings are one of the significant sources of energy consumption and greenhouse gas emission in urban areas all over the world. Lighting control and building integrated photovoltaic (BIPV) are two effective measures in reducing overall primary energy consumption and carbon emission during building operation. Due to the complex energy nature of the building, accurate day-ahead prediction of heat…	Prediction framework; Artificial neural network; Support vector machine; Long-short-term-memory; Multiple energy loads; Building integrated photovoltaic	SUPPORT VECTOR MACHINE; ARTIFICIAL NEURAL-NETWORK; DISTRICT-HEATING SYSTEMS; ELECTRICITY CONSUMPTION; SHORT-TERM; OFFICE BUILDINGS; DEMAND; PERFORMANCE; FORECAST; MODELS	Yes	Confirmed	building-level	fuel switch		SUSTAINABLE CITIES AND SOCIETY	J	Article	19	Construction & Building Technology; Green & Sustainable Science & Technology; Energy & Fuels	Luo, XJ; Oyedele, LO; Ajayi, AO; Akinade, OO	[Luo, X. J.; Oyedele, Lukumon O.; Ajayi, Anuoluwapo O.; Akinade, Olugbenga O.] Univ West England, Big Data Enterprise & Artificial Intelligence Lab, Frenchay Campus, Bristol, Avon, England	10.1016/j.scs.2020.102283
	2020	Evaluating the potential of adaptive comfort approach using historic data to reduce energy consumption in buildings in southern Spain	The application of adaptive comfort models is among the determinant factors to reduce greenhouse gas emissions in the building sector. This research studies the region of Andalusia (south of Spain). A cluster analysis is applied to 786 Andalusian municipalities, and 4 groups are established according to the potential of adaptive strategies. A town is chosen from each group, and an hourly specific…	Adaptive comfort; Energy saving; Adaptive setpoint temperature; Natural ventilation; Andalusia	MIXED-MODE VENTILATION; THERMAL COMFORT; OFFICE BUILDINGS; SYSTEMS; DEMAND; IMPACT	Yes	Confirmed	operational efficiency	building-level		BUILDING AND ENVIRONMENT	J	Article	1	Construction & Building Technology; Engineering, Environmental; Engineering, Civil	Bienvenido-Huertas, D; Rubio-Bellido, C; Farinha, F; Oliveira, MJ; Perez-Ordonez, JL	[Bienvenido-Huertas, David; Rubio-Bellido, Carlos] Univ Seville, Dept Graph Express & Bldg Engn, Av Reina Mercedes 4A, Seville 41012, Spain; [Farinha, Fatima; Oliveira, Miguel Jose] Univ Algarve, Inst Engn, Campus Penha, P-8005139 Faro, Portugal; [Luis Perez-Ordonez, Juan] Univ A Coruna, Dept Civil Engn, ETSI Caminos Canales & Puertos, Campus Elvina S-N, La Coruna 15071, Spain	10.1016/j.buildenv.2020.107313	Andalusia	Spain
	2020	AI-Based Campus Energy Use Prediction for Assessing the Effects of Climate Change	In developed countries, buildings are involved in almost 50% of total energy use and 30% of global annual greenhouse gas emissions. The operational energy needs of buildings are highly dependent on various building physical, operational, and functional characteristics, as well as meteorological and temporal properties. Besides physics-based energy modeling of buildings, Artificial Intelligence (A…	climate change; building energy performance forecasting; machine learning; urban buildings energy; scenario analysis	BUILDINGS; CONSUMPTION	Yes	Confirmed	operational efficiency	Modeling method contribution		SUSTAINABILITY	J	Article	4	Green & Sustainable Science & Technology; Environmental Sciences; Environmental Studies	Fathi, S; Srinivasan, RS; Kibert, CJ; Steiner, RL; Demirezen, E	[Fathi, Soheil; Srinivasan, Ravi S.] Univ Florida, Urban Bldg Energy Sensing Controls Big Data Anal, Gainesville, FL 32611 USA; [Kibert, Charles J.] Univ Florida, Powell Ctr Construct & Environm, Gainesville, FL 32611 USA; [Steiner, Ruth L.] Univ Florida, Ctr Hlth & Built Environm, Gainesville, FL 32611 USA; [Demirezen, Emre] Univ Florida, Warrington Coll Business, Gainesville, FL 32611 USA	10.3390/su12083223	Gainesville	USA
	2021	Optimization of Intelligent Heating Ventilation Air Conditioning System in Urban Building based on BIM and Artificial Intelligence Technology	The study aims to effectively reduce building energy consumption, improve the utilization efficiency of building resources, reduce the emission of pollutants and greenhouse gases, and protect the ecological environment. A prediction model of heating ventilation air conditioning (HVAC) energy consumption is established by using back propagation neural network (BPNN) and adapted boosting (Adaboost)…	building information modeling; Adaboost-BP algorithm; heating ventilation air conditioning system; energy consumption prediction; simulation	INFORMATION MODELING BIM; HVAC SYSTEMS; ENERGY; RECOGNITION; CONSUMPTION; FLOW	Yes	Confirmed	operational efficiency	building-level		COMPUTER SCIENCE AND INFORMATION SYSTEMS	J	Article	0	Computer Science, Information Systems; Computer Science, Software Engineering	Liu, ZH; Jiang, GY	[Liu, Zhonghui] Univ Kitakyushu, Sch Environm Engn, Kitakyushu, Fukuoka 8080135, Japan; [Jiang, Gongyi] Tourism Coll Zhejiang, Hangzhou 310000, Peoples R China	10.2298/CSIS200901027L
	2021	Deep Learning-Based Generation of Building Stock Data from Remote Sensing for Urban Heat Demand Modeling	Cities are responsible for a large share of the global energy consumption. A third of the total greenhouse gas emissions are related to the buildings sector, making it an important target for reducing urban energy consumption. Detailed data on the building stock, including the thermal characteristics of individual buildings, such as the construction type, construction period, and building geometr…	building stock model; building type; deep learning; heat demand modeling; digital surface model; aerial image	EARTH OBSERVATION; ENERGY USE; CLASSIFICATION; CITY; GIS; CONSUMPTION; FRAMEWORK; FEATURES; IMAGES; SCALE	Yes	Confirmed	retrofit envelope	consumer behavior		ISPRS INTERNATIONAL JOURNAL OF GEO-INFORMATION	J	Article	6	Computer Science, Information Systems; Geography, Physical; Remote Sensing	Wurm, M; Droin, A; Stark, T; Geiss, C; Sulzer, W; Taubenbock, H	[Wurm, Michael; Droin, Ariane; Geiss, Christian; Taubenboeck, Hannes] German Aerosp Ctr DLR, German Remote Sensing Data Ctr DFD, D-82234 Oberpfaffenhofen, Wessling, Germany; [Droin, Ariane; Sulzer, Wolfgang] Karl Franzens Univ Graz, Inst Geog & Reg Planning, Heinrichstr 36, A-8010 Graz, Austria; [Stark, Thomas] Tech Univ Munich, Signal Proc Earth Observat, D-80333 Munich, Germany	10.3390/ijgi10010023	Münster	Germany
	2020	Techno-economic analysis of air-source heat pump (ASHP) technology for single-detached home heating applications in Canada	The air-source heat pump (ASHP) is a popular system that does not see much use in cold-climates despite its high potential in low carbon footprint. This study was designed to evaluate the techno-economic feasibility of its application to single-detached homes in Canada. First, a set of support vector regression (SVR) models was developed by a housing database for prediction of the exposed surface…		BUILDING ENERGY-CONSUMPTION; SUPPORT VECTOR REGRESSION; PERFORMANCE ANALYSIS; OPTIMIZATION; SYSTEM; EXCHANGER; ONTARIO; UNIT	Yes	Confirmed	building-level	fuel switch		SCIENCE AND TECHNOLOGY FOR THE BUILT ENVIRONMENT	J	Article	2	Thermodynamics; Construction & Building Technology; Engineering, Mechanical	Udovichenko, A; Zhong, LX	[Udovichenko, Artur; Zhong, Lexuan] Univ Alberta, Dept Mech Engn, 9211-116 St NW, Edmonton, AB T6G 1H9, Canada	10.1080/23744731.2020.1787083	Vancouver, Toronto, Edmonton, Yellowknife, Vancouver, Toronto, Edmonton, Yellowknife	Canada
	2021	Downscaling Building Energy Consumption Carbon Emissions by Machine Learning	The rapid rate of urbanization is causing increasing annual urban energy usage, drastic energy shortages, and pollution. Building operational energy consumption carbon emissions (BECCE) account for a substantial proportion of greenhouse gas emissions, crucially influencing global warming and the sustainability of urban socioeconomic development. As a foundation of building energy conservation, de…	downscaling; Cubist; fine scale; building energy consumption; carbon emissions; partial least squares regression	LEAST-SQUARES REGRESSION; CHINA; URBANIZATION; METHODOLOGY; CLIMATE; IMPACT	Yes	Confirmed	operational efficiency	consumer behavior		REMOTE SENSING	J	Article	2	Environmental Sciences; Geosciences, Multidisciplinary; Remote Sensing; Imaging Science & Photographic Technology	Zhao, ZQ; Yang, XC; Yan, H; Huang, YY; Zhang, GQ; Lin, T; Ye, H	[Zhao, Zhuoqun; Yan, Han; Huang, Yiyi; Zhang, Guoqin; Lin, Tao; Ye, Hong] Chinese Acad Sci, Inst Urban Environm, Key Lab Urban Environm & Hlth, Xiamen 361021, Peoples R China; [Zhao, Zhuoqun; Yan, Han] Univ Chinese Acad Sci, Beijing 100049, Peoples R China; [Yang, Xuchao] Zhejiang Univ, Ocean Coll, Zhoushan 316021, Peoples R China; [Zhang, Guoqin; Lin, Tao; Ye, Hong] Xiamen Key Lab Urban Metab, X…	10.3390/rs13214346
	2021	A machine learning-based surrogate model to approximate optimal building retrofit solutions	The building sector has the highest share of operational energy consumption and greenhouse gas emissions among all sectors. Environmental targets set by many countries impose the need to improve the environmental footprint of the existing building stock. Building retrofit is considered one of the most promising solutions to-wards this direction. In this paper, a surrogate model for evaluating the…	Building retrofit; Energy efficiency; Surrogate model; Machine learning; Multi-objective optimization; Pareto-optimal	ARTIFICIAL NEURAL-NETWORKS; COST-OPTIMAL ANALYSIS; MULTIOBJECTIVE OPTIMIZATION; ENERGY RETROFIT; PERFORMANCE; SYSTEMS; METHODOLOGY; RENOVATION; SUPPORT; DESIGN	Yes	Confirmed	retrofit envelope			APPLIED ENERGY	J	Article	8	Energy & Fuels; Engineering, Chemical	Thrampoulidis, E; Mavromatidis, G; Lucchi, A; Orehounig, K	[Thrampoulidis, Emmanouil] Swiss Fed Inst Technol, EEH Power Syst Lab, Zurich, Switzerland; [Thrampoulidis, Emmanouil; Orehounig, Kristina] Empa Dubendorf, Lab Urban Energy Syst, Dubendorf, Switzerland; [Mavromatidis, Georgios] Swiss Fed Inst Technol, Grp Sustainabil & Technol, Zurich, Switzerland; [Lucchi, Aurelien] Swiss Fed Inst Technol, Inst Machine Learning, Data Analyt Lab, Zurich, Switzerl…	10.1016/j.apenergy.2020.116024		China
	2021	Suggesting a Stochastic Fractal Search Paradigm in Combination with Artificial Neural Network for Early Prediction of Cooling Load in Residential Buildings	Early prediction of thermal loads plays an essential role in analyzing energy-efficient buildings' energy performance. On the other hand, stochastic algorithms have recently shown high proficiency in dealing with this issue. These are the reasons that this study is dedicated to evaluating an innovative hybrid method for predicting the cooling load (CL) in buildings with residential usage. The pro…	energy-efficiency; HVAC; machine learning; cooling load; deep learning; big data; artificial intelligence; nature-inspired metaheuristic; building energy; zero energy; smart city; smart buildings	GRASSHOPPER OPTIMIZATION ALGORITHM; GREENHOUSE-GAS EMISSIONS; FEATURE-SELECTION; ENERGY OPTIMIZATION; HEATING LOAD; FUZZY-LOGIC; SYSTEM; PERFORMANCE; INTELLIGENCE; CONSUMPTION	Yes	Confirmed	building-level	operational efficiency		ENERGIES	J	Article	12	Energy & Fuels	Moayedi, H; Mosavi, A	[Moayedi, Hossein] Duy Tan Univ, Inst Res & Dev, Da Nang 550000, Vietnam; [Moayedi, Hossein] Duy Tan Univ, Fac Civil, Da Nang 550000, Vietnam; [Mosavi, Amir] Tech Univ Dresden, Fac Civil Engn, D-01069 Dresden, Germany; [Mosavi, Amir] Bauhaus Univ Weimar, Inst Struct Mech, D-99423 Weimar, Germany; [Mosavi, Amir] Obuda Univ, John von Neumann Fac Informat, H-1034 Budapest, Hungary	10.3390/en14061649
	2021	Probability estimation of the city's energy efficiency improvement as a result of using the phase change materials in heating networks	One of the problems in cities is improving energy efficiency. Energy consumption and the efficient use of district heating networks affect the environment, society, and economy. Modern materials to increase buildings' energy efficiency become necessary. The use of phase change materials (PCM) is a current issue and many researchers' interest. PCM reduces energy consumption in buildings due to the…	Energy efficiency improvements; Energy policy-making; Urban analysis; Phase change materials; Multi-criteria analysis; Bayesian network	THERMAL PERFORMANCE; BAYESIAN NETWORKS; URBAN AREAS; BUILDINGS; PCM; GIS; MODEL; BIPV; RETROFIT; SYSTEMS	Yes	Confirmed	district heating and cooling	operational efficiency		ENERGY	J	Article	1	Thermodynamics; Energy & Fuels	Skiba, M; Mrowczynska, M; Sztubecka, M; Bazan-Krzywoszanska, A; Kazak, JK; Lesniak, A; Janowiec, F	[Skiba, Marta; Mrowczynska, Maria; Bazan-Krzywoszanska, Anna] Univ Zielona Gora, Fac Civil Engn Architecture & Environm Engn, Ul Szafrna 1, PL-65516 Zielona Gora, Poland; [Sztubecka, Malgorzata] UTP Univ Sci & Technol Bydgoszcz, Fac Civil & Environm Engn & Architecture, Al Prof S Kaliskiego 7, PL-85796 Bydgoszcz, Poland; [Kazak, Jan K.] Wroclaw Univ Environm & Life Sci, Inst Spatial Management, U…	10.1016/j.energy.2021.120549	Zielona Góra	Poland
	2020	Energy-saving behavior of urban residents in China: A multi-agent simulation	With recent improvements in residents' quality of life and the implementation of the two-child policy, guiding the energy-saving behavior of urban residents has become a focus for achieving the national goals of the sustainable development strategy in China. Considering the subjective initiatives of individuals in a realistic environment is the key to studying energy-saving behavior and guiding p…	Urban residents; Energy-saving behavior; Policy situation; Multi-agent simulation	PRO-ENVIRONMENTAL BEHAVIOR; CONSUMPTION BEHAVIOR; DETERMINANTS; CONSERVATION; HOUSEHOLDS; INTENTION; CONSUMERS; PROVINCE; IMPACT	Yes	Confirmed	consumer behavior			JOURNAL OF CLEANER PRODUCTION	J	Article	11	Green & Sustainable Science & Technology; Engineering, Environmental; Environmental Sciences	Yue, T; Long, RY; Chen, H; Liu, JL; Liu, HW; Gu, Y	[Yue, Ting; Long, Ruyin; Chen, Hong; Liu, Junli; Liu, Haiwen] China Univ Min & Technol, Sch Management, Xuzhou 221116, Jiangsu, Peoples R China; [Gu, Yu] Univ Calif Los Angeles, Joint Inst Reg Earth Syst Sci & Engn, Los Angeles, CA 90095 USA; [Gu, Yu] Univ Calif Los Angeles, Dept Atmospher & Ocean Sci, Los Angeles, CA 90095 USA	10.1016/j.jclepro.2019.119623		China
	2021	Data-driven optimization of building layouts for energy efficiency	One of the primary driving factors in building energy performance is occupant behavioral dynamics. As a result, the layout of building occupant workstations is likely to influence energy consumption. In this paper, we introduce methods for relating lighting zone energy to zone-level occupant dynamics, simulating energy consumption of a lighting system based on this relationship, and optimizing th…	Occupant dynamics; Design optimization; Data-driven simulation; Energy efficiency; Machine learning	OCCUPANT BEHAVIOR; RANDOM FOREST; SIMULATION; PERFORMANCE; CONSUMPTION; SPACE; PREDICTION; COMFORT; DESIGN; IMPACT	Yes	Confirmed	operational efficiency	consumer behavior		ENERGY AND BUILDINGS	J	Article	1	Construction & Building Technology; Energy & Fuels; Engineering, Civil	Sonta, A; Dougherty, TR; Jain, RK	[Sonta, Andrew; Dougherty, Thomas R.; Jain, Rishee K.] Stanford Univ, Dept Civil & Environm Engn, Urban Informat Lab, 473 Via Ortega Rm 269B, Stanford, CA 94305 USA	10.1016/j.enbuild.2021.110815
	2021	Forecasting peak energy demand for smart buildings	Predicting energy consumption in buildings plays an important part in the process of digital transformation of the built environment, and for understanding the potential for energy savings. This also contributes to reducing the impact of climate change, where buildings need to increase their adaptability and resilience while reducing energy consumption and maintain user comfort. The use of Intern…	Energy forecasting; Time series; ARIMA; Peak demand; ANN; Smart buildings	TIME-SERIES; ELECTRICITY CONSUMPTION; NEURAL-NETWORK; PREDICTION; MODEL	Yes	Confirmed	building-level	demand response		JOURNAL OF SUPERCOMPUTING	J	Article	6	Computer Science, Hardware & Architecture; Computer Science, Theory & Methods; Engineering, Electrical & Electronic	Alduailij, MA; Petri, I; Rana, O; Alduailij, MA; Aldawood, AS	[Alduailij, Mona A.; Alduailij, Mai A.] Princess Nourah Bint Abdulrahman Univ, Coll Comp & Informat Sci, Riyadh, Saudi Arabia; [Petri, Ioan] Cardiff Univ, Sch Engn, Cardiff, Wales; [Rana, Omer] Cardiff Univ, Sch Comp Sci & Informat, Cardiff, Wales; [Aldawood, Abdulrahman S.] King Saud Univ, Coll Food & Agr Sci, Riyadh, Saudi Arabia	10.1007/s11227-020-03540-3
	2021	Modelling heating and cooling energy demand for building stock using a hybrid approach	The building sector accounts for 30% of final energy consumption and 28% of global energy-related carbon dioxide emissions, with space heating and cooling consuming a large share of total buildings' energy consumption. Building stock modelling for space heating and cooling energy prediction provides critical insights on the stock energy consumption and aid the building retrofit policy-making proc…	Building energy consumption; Heating and cooling; Building Stock modelling; Hybrid approach; Machine learning	DATA-DRIVEN; CONSUMPTION PREDICTION; USE INTENSITY; MACHINE; SCALE; REGRESSION; SELECTION; LOAD	Yes	Confirmed	consumer behavior	operational efficiency	retrofit envelope	ENERGY AND BUILDINGS	J	Article	18	Construction & Building Technology; Energy & Fuels; Engineering, Civil	Li, XY; Yao, RM	[Li, Xinyi] Univ Sheffield, Dept Civil & Struct Engn, Sheffield S1 3JD, S Yorkshire, England; [Li, Xinyi; Yao, Runming] Chongqing Univ, Joint Int Lab Green Bldg & Built Environment, Minist Educ, Chongqing 400045, Peoples R China; [Yao, Runming] Univ Reading, Sch Built Environm, Whiteknights POB 219, Reading RG6 6AW, Berks, England	10.1016/j.enbuild.2021.110740	Chongqing	China
	2021	Online Unsupervised Occupancy Anticipation System Applied to Residential Heat Load Management	Human preferences and lifestyles significantly impact buildings' energy consumption. Consequently, a better understanding of occupants' behavior is crucial to decrease energy consumption and maintain occupants' comfort. Occupant-centric control (OCC) strategies are effective approaches to fulfil such a purpose. As such, occupancy detection and prediction are of prime importance, particularly to m…	Hidden Markov models; Buildings; Energy consumption; Predictive models; Hazards; Space heating; Prediction algorithms; Occupant behavior; occupant-centric control; hidden markov models; survival analysis	PERFORMANCE ANALYSIS; HOUSEHOLD OCCUPANCY; BUILDINGS; BEHAVIOR; MODEL; HOME; OPTIMIZATION; PREDICTION; DESIGN	Yes	Confirmed	building-level	consumer behavior		IEEE ACCESS	J	Article	0	Computer Science, Information Systems; Engineering, Electrical & Electronic; Telecommunications	Rueda, L; Agbossou, K; Henao, N; Kelouwani, S; Oviedo-Cepeda, JC; Le Lostec, B; Sansregret, S; Fournier, M	[Rueda, Luis; Agbossou, Kodjo; Henao, Nilson] Univ Quebec Trois Rivieres, Hydrogen Res Inst, Dept Elect & Comp Engn, Trois Rivieres, PQ G8Z 4M3, Canada; [Kelouwani, Sousso] Univ Quebec Trois Rivieres, Hydrogen Res Inst, Dept Mech Engn, Trois Rivieres, PQ G8Z 4M3, Canada; [Oviedo-Cepeda, Juan C.; Le Lostec, Brice; Sansregret, Simon; Fournier, Michael] Inst Rech Hydroquebec, Lab Technol Energie, Sh…	10.1109/ACCESS.2021.3098631	Quebec	Canada
	2021	Effective factors for residential building energy modeling using feature engineering	Given the improved understanding of sustainability, hundreds of factors are identified to have relevance to building energy efficiency. However, there is still a lack of knowledge about what factors play a significant role in energy consumption prediction for residential buildings. In the absence of this information, building energy consumption prediction would not be efficient. To tackle this pr…	Residential energy use; Residential building; Machine learning; Feature selection; Energy use prediction; Census region	CONSUMPTION; PERFORMANCE; BEHAVIOR; OCCUPANCY	Yes	Confirmed	CO2 emission/energy consumption prediction			JOURNAL OF BUILDING ENGINEERING	J	Article	1	Construction & Building Technology; Engineering, Civil	Mo, Y; Zhao, D	[Mo, Yunjeong] Univ North Florida, Construct Management Dept, 1 UNF Dr, Jacksonville, FL 32224 USA; [Zhao, Dong] Michigan State Univ, Sch Planning Design & Construct, Dept Civil & Environm Engn, 552 W Circle Dr, E Lansing, MI 48824 USA	10.1016/j.jobe.2021.102891		USA
	2022	Developing a Deep Neural Network with Fuzzy Wavelets and Integrating an Inline PSO to Predict Energy Consumption Patterns in Urban Buildings	Energy has been one of the most important topics of political and social discussion in recent decades. A significant proportion of the country's revenues is derived from energy resources, making it one of the most important and strategic macro policy and sustainable development areas. Energy demand modeling is one of the essential strategies for better managing the energy sector and developing ap…	energy consumption; urban building; fuzzy logic; wavelet; inline PSO; machine learning	OCCUPANCY; DEMAND	Yes	Confirmed	consumer behavior			MATHEMATICS	J	Article	0	Mathematics	Ahmadi, M; Soofiabadi, M; Nikpour, M; Naderi, H; Abdullah, L; Arandian, B	[Ahmadi, Mohsen] Urmia Univ Technol, Dept Ind Engn, Orumiyeh 5716693188, Iran; [Soofiabadi, Mahsa] Polytech Univ Milan, Sch Architecture Urban Planning Construct Engn, I-29121 Piacenza, Italy; [Nikpour, Maryam] Islamic Azad Univ, Dept Architecture, Ahvaz Branch, Ahvaz 6134937333, Iran; [Naderi, Hossein] Pars Univ, Dept Construct Engn & Management, Tehran 1413915361, Iran; [Abdullah, Lazim] Univ M…	10.3390/math10081270	Mashhad, Ahvaz	Iran
	2021	The energy performance of dwellings of Dutch non-profit housing associations: Modelling actual energy consumption	In Europe, the energy performance of dwellings is measured using theoretical building energy models based on the Energy Performance of Buildings Directive (EPBD), which estimates the energy consumption of dwellings. However, literature shows large performance gaps between the theoretically predicted energy consumption and the actual energy consumption of dwellings. The goal of this paper is to in…	Energy performance; Non-profit housing; Empirical prediction models; Actual energy consumption	PREDICTION; MACHINE	Yes	Confirmed	consumer behavior	building-level		ENERGY AND BUILDINGS	J	Article	1	Construction & Building Technology; Energy & Fuels; Engineering, Civil	van der Bent, HS; van den Brom, PI; Visscher, HJ; Meijer, A; Mouter, N	[van der Bent, H. S.; van den Brom, P., I; Visscher, H. J.; Meijer, A.] Delft Univ Technol, Architecture & Built Environm, Delft, Netherlands; [Mouter, N.] Delft Univ Technol, Technol Policy & Management, Delft, Netherlands	10.1016/j.enbuild.2021.111486		Netherlands
	2020	Machine learning-based energy consumption clustering and forecasting for mixed-use buildings	Mixed-use buildings contribute to the sustainable development of cities by providing economic, environmental, and social benefits. Energy management of these buildings still remains a challenge due to their unpredictable energy consumption characteristics and the lack of design guidelines for energy efficiency and sustainability solutions. Energy consumption forecasting models have been crucial t…	energy conservation in buildings; energy consumption forecasting; energy modeling; machine learning; mixed-use buildings; urban energy systems	SOLAR; OPTIMIZATION; REGRESSION; MODELS	Yes	Confirmed	consumer behavior	building-level		INTERNATIONAL JOURNAL OF ENERGY RESEARCH	J	Article	10	Energy & Fuels; Nuclear Science & Technology	Culaba, AB; Del Rosario, AJR; Ubando, AT; Chang, JS	[Culaba, Alvin B.; Del Rosario, Aaron Jules R.; Ubando, Aristotle T.] De La Salle Univ, Mech Engn Dept, 2401 Taft Ave, Manila 0922, Philippines; [Culaba, Alvin B.; Ubando, Aristotle T.] De La Salle Univ, Ctr Engn & Sustainable Dev Res, Manila, Philippines; [Chang, Jo-Shu] Tunghai Univ, Coll Engn, Dept Chem & Mat Engn, Taichung, Taiwan; [Chang, Jo-Shu] Natl Cheng Kung Univ, Res Ctr Energy Technol …	10.1002/er.5523
[truncated: 869 more rows]
